# Supplementary material for: Plant Trans-Golgi Network/Early Endosome pH regulation requires Cation Chloride Cotransporter (CCC1)
Source: eLife. 2022 Jan 6;11:e70701. doi: 10.7554/eLife.70701 (PMC8791640; doi:10.7554/eLife.70701)
Supplement: Figure 2—source data 1. [file elife-70701-fig2-data1.xlsx]

## Sheet: Fig2B
Line	Cell	Length
Wt	Trichoblast	125.406
Wt	Trichoblast	140.393
Wt	Trichoblast	133.214
Wt	Trichoblast	123.734
Wt	Trichoblast	155.714
Wt	Trichoblast	165.743
Wt	Trichoblast	131.543
Wt	Trichoblast	104.251
Wt	Trichoblast	144.039
Wt	Trichoblast	107.882
Wt	Trichoblast	114.629
Wt	Trichoblast	151.478
Wt	Trichoblast	143.393
Wt	Trichoblast	115.876
Wt	Trichoblast	146.788
Wt	Trichoblast	219.891
Wt	Trichoblast	155.224
Wt	Trichoblast	240.922
Wt	Trichoblast	188.108
Wt	Trichoblast	165.774
Wt	Trichoblast	166.492
Wt	Trichoblast	107.262
Wt	Trichoblast	158.508
Wt	Trichoblast	131.207
Wt	Trichoblast	123.709
Wt	Trichoblast	111.595
Wt	Trichoblast	123.713
Wt	Trichoblast	144.643
Wt	Trichoblast	129.568
Wt	Trichoblast	149.335
Wt	Trichoblast	112.828
Wt	Trichoblast	124.35
Wt	Trichoblast	116.562
Wt	Trichoblast	89.392
Wt	Trichoblast	99.148
Wt	Trichoblast	107.278
Wt	Trichoblast	119.704
Wt	Trichoblast	119.337
Wt	Trichoblast	132.03
Wt	Trichoblast	60.637
Wt	Trichoblast	101.15
Wt	Trichoblast	110.856
Wt	Trichoblast	38.491
Wt	Trichoblast	84.479
Wt	Trichoblast	111.263
Wt	Trichoblast	136.562
Wt	Trichoblast	119.014
Wt	Trichoblast	104.647
Wt	Trichoblast	100.058
Wt	Trichoblast	142.311
Wt	Trichoblast	165.068
Wt	Trichoblast	153.655
Wt	Trichoblast	194.228
Wt	Trichoblast	146.197
Wt	Trichoblast	134.484
Wt	Trichoblast	177.976
Wt	Trichoblast	158.148
Wt	Trichoblast	124.438
Wt	Trichoblast	72.198
Wt	Trichoblast	202.211
Wt	Trichoblast	184.242
Wt	Trichoblast	225.435
Wt	Trichoblast	151.043
Wt	Trichoblast	189.534
Wt	Trichoblast	241.123
Wt	Trichoblast	144.673
Wt	Trichoblast	135.589
Wt	Trichoblast	148.048
Wt	Trichoblast	163.41
Wt	Trichoblast	159.268
Wt	Trichoblast	102.08
Wt	Trichoblast	171.474
Wt	Trichoblast	194.491
Wt	Trichoblast	153.741
Wt	Trichoblast	133.96
Wt	Trichoblast	132.949
Wt	Trichoblast	124.591
Wt	Trichoblast	110.063
Wt	Trichoblast	134.502
Wt	Trichoblast	147.38
Wt	Trichoblast	87.082
Wt	Trichoblast	89.643
Wt	Trichoblast	126.964
Wt	Trichoblast	148.643
Wt	Trichoblast	110.877
Wt	Trichoblast	107.914
Wt	Trichoblast	86.839
Wt	Trichoblast	128.266
Wt	Trichoblast	87.892
Wt	Trichoblast	40.007
Wt	Trichoblast	102.678
Wt	Trichoblast	111.432
Wt	Trichoblast	178.239
Wt	Trichoblast	145.473
Wt	Trichoblast	165.847
Wt	Trichoblast	83.061
Wt	Trichoblast	99.363
Wt	Trichoblast	69.087
Wt	Trichoblast	143.476
Wt	Trichoblast	102.249
Wt	Trichoblast	73.419
Wt	Trichoblast	154.368
Wt	Trichoblast	122.022
Wt	Trichoblast	132.76
Wt	Trichoblast	102.943
Wt	Trichoblast	162.784
Wt	Trichoblast	120.918
Wt	Trichoblast	131.266
Wt	Trichoblast	155.231
Wt	Trichoblast	188.077
Wt	Trichoblast	190.776
Wt	Trichoblast	99.209
Wt	Trichoblast	102.629
Wt	Trichoblast	114.42
Wt	Trichoblast	224.889
Wt	Trichoblast	159.394
Wt	Trichoblast	178.966
Wt	Trichoblast	182.918
Wt	Trichoblast	182.328
Wt	Trichoblast	174.624
Wt	Trichoblast	192.697
Wt	Trichoblast	232.192
Wt	Trichoblast	255.916
Wt	Trichoblast	110.701
Wt	Trichoblast	136.081
Wt	Trichoblast	214.082
Wt	Trichoblast	208.193
Wt	Trichoblast	161.758
Wt	Trichoblast	97.775
Wt	Trichoblast	86.199
Wt	Trichoblast	162.561
Wt	Trichoblast	177.447
Wt	Trichoblast	179.5
Wt	Trichoblast	103.209
Wt	Trichoblast	94.684
Wt	Trichoblast	108.571
Wt	Trichoblast	114.81
Wt	Trichoblast	133.568
Wt	Trichoblast	123.764
Wt	Trichoblast	160.125
Wt	Trichoblast	124.919
Wt	Trichoblast	125.725
Wt	Trichoblast	143.289
Wt	Trichoblast	152.101
Wt	Trichoblast	195.943
Wt	Trichoblast	180.561
Wt	Trichoblast	240.907
Wt	Trichoblast	140.598
Wt	Trichoblast	156.297
Wt	Trichoblast	143.115
Wt	Trichoblast	171.036
Wt	Trichoblast	125.884
Wt	Trichoblast	95.763
Wt	Trichoblast	111.158
Wt	Trichoblast	104.647
Wt	Trichoblast	103.963
Wt	Trichoblast	89.53
Wt	Trichoblast	117.376
Wt	Trichoblast	94.421
Wt	Trichoblast	86.3
Wt	Trichoblast	107.872
Wt	Trichoblast	124.791
Wt	Trichoblast	123.86
Wt	Trichoblast	131.478
Wt	Trichoblast	118.855
Wt	Trichoblast	113.142
Wt	Trichoblast	124.947
Wt	Trichoblast	149.263
Wt	Trichoblast	136.804
Wt	Trichoblast	153.938
Wt	Trichoblast	132.788
Wt	Trichoblast	102.737
Wt	Trichoblast	117.31
Wt	Trichoblast	171.156
Wt	Trichoblast	207.194
Wt	Trichoblast	87.078
Wt	Trichoblast	96.483
Wt	Trichoblast	98.561
Wt	Trichoblast	99.444
Wt	Trichoblast	114.047
Wt	Trichoblast	125.862
Wt	Trichoblast	102.857
Wt	Trichoblast	127.812
Wt	Trichoblast	116.935
Wt	Trichoblast	152.987
Wt	Trichoblast	168.57
Wt	Trichoblast	156.231
Wt	Trichoblast	100.28
Wt	Trichoblast	116.777
Wt	Trichoblast	95.156
Wt	Trichoblast	118.914
Wt	Trichoblast	124.244
Wt	Trichoblast	96.016
Wt	Trichoblast	92.126
Wt	Trichoblast	89.653
Wt	Trichoblast	131.306
Wt	Trichoblast	109.127
Wt	Trichoblast	89.109
Wt	Trichoblast	115.848
Wt	Trichoblast	171.341
Wt	Trichoblast	115.436
Wt	Trichoblast	178.824
Wt	Trichoblast	188.917
Wt	Trichoblast	94.017
Wt	Trichoblast	160.783
Wt	Trichoblast	128.752
Wt	Trichoblast	129.118
Wt	Trichoblast	114.376
Wt	Trichoblast	123.755
Wt	Trichoblast	141.333
Wt	Trichoblast	148.346
Wt	Trichoblast	179.06
Wt	Trichoblast	149.981
Wt	Trichoblast	151.394
Wt	Trichoblast	241.82
Wt	Trichoblast	249.453
Wt	Trichoblast	197.483
Wt	Trichoblast	203.148
Wt	Trichoblast	218.712
Wt	Trichoblast	204.989
Wt	Trichoblast	218.693
Wt	Trichoblast	203.818
Wt	Trichoblast	130.271
Wt	Trichoblast	134.651
Wt	Trichoblast	133.188
Wt	Trichoblast	164.519
Wt	Trichoblast	175.332
Wt	Trichoblast	182.226
Wt	Trichoblast	165.51
Wt	Trichoblast	95.058
Wt	Trichoblast	171.145
Wt	Trichoblast	163.705
Wt	Trichoblast	132.565
Wt	Trichoblast	117.199
Wt	Trichoblast	128.949
Wt	Trichoblast	103.239
ccc1	Trichoblast	47.578
ccc1	Trichoblast	54.625
ccc1	Trichoblast	58.536
ccc1	Trichoblast	57.22
ccc1	Trichoblast	52.162
ccc1	Trichoblast	22.478
ccc1	Trichoblast	17.867
ccc1	Trichoblast	53.29
ccc1	Trichoblast	74.874
ccc1	Trichoblast	62.204
ccc1	Trichoblast	69.297
ccc1	Trichoblast	37.857
ccc1	Trichoblast	25.684
ccc1	Trichoblast	15.785
ccc1	Trichoblast	52.616
ccc1	Trichoblast	56.002
ccc1	Trichoblast	33.304
ccc1	Trichoblast	34.784
ccc1	Trichoblast	64.364
ccc1	Trichoblast	90.975
ccc1	Trichoblast	77.732
ccc1	Trichoblast	49.542
ccc1	Trichoblast	43.533
ccc1	Trichoblast	37.696
ccc1	Trichoblast	26.998
ccc1	Trichoblast	46.739
ccc1	Trichoblast	39.55
ccc1	Trichoblast	57.657
ccc1	Trichoblast	47.254
ccc1	Trichoblast	48.514
ccc1	Trichoblast	48.657
ccc1	Trichoblast	65.074
ccc1	Trichoblast	78.203
ccc1	Trichoblast	99.316
ccc1	Trichoblast	119.206
ccc1	Trichoblast	118.854
ccc1	Trichoblast	103
ccc1	Trichoblast	105.713
ccc1	Trichoblast	118.593
ccc1	Trichoblast	89.74
ccc1	Trichoblast	121.677
ccc1	Trichoblast	84.895
ccc1	Trichoblast	111.543
ccc1	Trichoblast	89.682
ccc1	Trichoblast	93.26
ccc1	Trichoblast	96.703
ccc1	Trichoblast	146.186
ccc1	Trichoblast	112.792
ccc1	Trichoblast	115.271
ccc1	Trichoblast	129.078
ccc1	Trichoblast	150.331
ccc1	Trichoblast	154.414
ccc1	Trichoblast	195.319
ccc1	Trichoblast	168.682
ccc1	Trichoblast	179.345
ccc1	Trichoblast	120.518
ccc1	Trichoblast	123.307
ccc1	Trichoblast	120.338
ccc1	Trichoblast	99.854
ccc1	Trichoblast	89.911
ccc1	Trichoblast	185.842
ccc1	Trichoblast	87.452
ccc1	Trichoblast	87.068
ccc1	Trichoblast	182.69
ccc1	Trichoblast	193.219
ccc1	Trichoblast	171.227
ccc1	Trichoblast	139.771
ccc1	Trichoblast	85.827
ccc1	Trichoblast	104.658
ccc1	Trichoblast	197.536
ccc1	Trichoblast	154.427
ccc1	Trichoblast	129.583
ccc1	Trichoblast	147.728
ccc1	Trichoblast	142.42
ccc1	Trichoblast	90.908
ccc1	Trichoblast	163.025
ccc1	Trichoblast	175.922
ccc1	Trichoblast	209.379
ccc1	Trichoblast	155.043
ccc1	Trichoblast	106.111
ccc1	Trichoblast	113.463
ccc1	Trichoblast	92.102
ccc1	Trichoblast	87.633
ccc1	Trichoblast	100.741
ccc1	Trichoblast	102.612
ccc1	Trichoblast	107.369
ccc1	Trichoblast	108.092
ccc1	Trichoblast	117.76
ccc1	Trichoblast	110.856
ccc1	Trichoblast	47.189
ccc1	Trichoblast	57.205
ccc1	Trichoblast	82.965
ccc1	Trichoblast	89.643
ccc1	Trichoblast	76.305
ccc1	Trichoblast	78.27
ccc1	Trichoblast	102.773
ccc1	Trichoblast	86.857
ccc1	Trichoblast	77.089
ccc1	Trichoblast	111.16
ccc1	Trichoblast	54.331
ccc1	Trichoblast	53.307
ccc1	Trichoblast	103.794
ccc1	Trichoblast	82.803
ccc1	Trichoblast	65.166
ccc1	Trichoblast	65.325
ccc1	Trichoblast	74.321
ccc1	Trichoblast	53.014
ccc1	Trichoblast	51.57
ccc1	Trichoblast	63.882
ccc1	Trichoblast	65.784
ccc1	Trichoblast	118.453
ccc1	Trichoblast	138.245
ccc1	Trichoblast	101.363
ccc1	Trichoblast	76.123
ccc1	Trichoblast	52.108
ccc1	Trichoblast	52.649
ccc1	Trichoblast	53.936
ccc1	Trichoblast	167.154
ccc1	Trichoblast	116.605
ccc1	Trichoblast	95.946
ccc1	Trichoblast	104.511
ccc1	Trichoblast	153.122
ccc1	Trichoblast	150.534
ccc1	Trichoblast	152.135
ccc1	Trichoblast	187.048
ccc1	Trichoblast	172.145
ccc1	Trichoblast	157.801
ccc1	Trichoblast	109.236
ccc1	Trichoblast	158.421
ccc1	Trichoblast	135.778
ccc1	Trichoblast	150.101
ccc1	Trichoblast	157.849
ccc1	Trichoblast	224.325
ccc1	Trichoblast	199.529
ccc1	Trichoblast	150.65
ccc1	Trichoblast	127.703
ccc1	Trichoblast	122.679
ccc1	Trichoblast	162.181
ccc1	Trichoblast	206.966
ccc1	Trichoblast	74.332
ccc1	Trichoblast	120.448
ccc1	Trichoblast	153.359
ccc1	Trichoblast	116.777
ccc1	Trichoblast	113.743
ccc1	Trichoblast	82.308
ccc1	Trichoblast	94.767
ccc1	Trichoblast	98.833
ccc1	Trichoblast	159.512
ccc1	Trichoblast	157.797
ccc1	Trichoblast	146.705
ccc1	Trichoblast	208.028
ccc1	Trichoblast	209.523
ccc1	Trichoblast	63.939
ccc1	Trichoblast	33.18
ccc1	Trichoblast	52.801
ccc1	Trichoblast	61.011
ccc1	Trichoblast	28.005
ccc1	Trichoblast	38.062
ccc1	Trichoblast	56.769
ccc1	Trichoblast	52.887
ccc1	Trichoblast	21.544
ccc1	Trichoblast	93.902
ccc1	Trichoblast	98.792
ccc1	Trichoblast	91.43
ccc1	Trichoblast	87.603
ccc1	Trichoblast	71.145
ccc1	Trichoblast	66.059
ccc1	Trichoblast	45.305
ccc1	Trichoblast	37.811
ccc1	Trichoblast	16.652
ccc1	Trichoblast	97.536
ccc1	Trichoblast	86.317
ccc1	Trichoblast	68.224
ccc1	Trichoblast	64.324
ccc1	Trichoblast	66.049
ccc1	Trichoblast	52.038
ccc1	Trichoblast	44.515
ccc1	Trichoblast	63.719
ccc1	Trichoblast	33.672
ccc1	Trichoblast	36.531
ccc1	Trichoblast	71.907
ccc1	Trichoblast	74.507
ccc1	Trichoblast	83.298
ccc1	Trichoblast	34.459
ccc1	Trichoblast	57.747
ccc1	Trichoblast	74.608
ccc1	Trichoblast	61.575
ccc1	Trichoblast	35.741
ccc1	Trichoblast	48.242
ccc1	Trichoblast	52.854
ccc1	Trichoblast	72.458
ccc1	Trichoblast	28.396
ccc1	Trichoblast	36.767
ccc1	Trichoblast	62.534
ccc1	Trichoblast	81.399
ccc1	Trichoblast	54.18
ccc1	Trichoblast	29.036
ccc1	Trichoblast	38.13
ccc1	Trichoblast	57.956
ccc1	Trichoblast	89.466
ccc1	Trichoblast	98.691
ccc1	Trichoblast	96.034
ccc1	Trichoblast	112.949
ccc1	Trichoblast	116.518
ccc1	Trichoblast	95.122
ccc1	Trichoblast	157.114
ccc1	Trichoblast	183.202
ccc1	Trichoblast	167.957
ccc1	Trichoblast	113.226
ccc1	Trichoblast	93.812
ccc1	Trichoblast	124.447
ccc1	Trichoblast	109.11
ccc1	Trichoblast	125.468
ccc1	Trichoblast	93.192
ccc1	Trichoblast	112.485
ccc1	Trichoblast	111.496
ccc1	Trichoblast	126.785
ccc1	Trichoblast	121.943
ccc1	Trichoblast	137.159
ccc1	Trichoblast	133.642
ccc1	Trichoblast	96.144
ccc1	Trichoblast	98.971
ccc1	Trichoblast	116.295
ccc1	Trichoblast	185.044
ccc1	Trichoblast	181.003
ccc1	Trichoblast	191.062
ccc1	Trichoblast	97.165
ccc1	Trichoblast	115.64
ccc1	Trichoblast	151.063
ccc1	Trichoblast	93.157
ccc1	Trichoblast	91.298
ccc1	Trichoblast	59.285
ccc1	Trichoblast	21.863
ccc1	Trichoblast	24.767
ccc1	Trichoblast	59.941
ccc1	Trichoblast	77.134
ccc1	Trichoblast	15.633
ccc1	Trichoblast	29.362
ccc1	Trichoblast	66.223
ccc1	Trichoblast	44.888
ccc1	Trichoblast	21.413
ccc1	Trichoblast	47.809
ccc1	Trichoblast	48.554
ccc1	Trichoblast	69.212
ccc1	Trichoblast	78.234
ccc1	Trichoblast	58.506
ccc1	Trichoblast	60.865
ccc1	Trichoblast	81.42
ccc1	Trichoblast	63.417
ccc1	Trichoblast	64.726
ccc1	Trichoblast	58.606
ccc1	Trichoblast	72.455
ccc1	Trichoblast	96.625
ccc1	Trichoblast	89.237
ccc1	Trichoblast	82.002
ccc1	Trichoblast	85.757
ccc1	Trichoblast	85.754
ccc1	Trichoblast	100.276
ccc1	Trichoblast	125.637
ccc1	Trichoblast	139.143
ccc1	Trichoblast	99.424
ccc1	Trichoblast	96.779
ccc1	Trichoblast	185.893
ccc1	Trichoblast	88.478
ccc1	Trichoblast	83.944
ccc1	Trichoblast	65.645
ccc1	Trichoblast	67.823
ccc1	Trichoblast	106.143
ccc1	Trichoblast	109.252
ccc1	Trichoblast	177.646
ccc1	Trichoblast	154.484
ccc1	Trichoblast	166.524
ccc1	Trichoblast	180.321
ccc1	Trichoblast	229.387
ccc1	Trichoblast	116.163
ccc1	Trichoblast	127.153
ccc1	Trichoblast	112.13
ccc1	Trichoblast	95.431
ccc1	Trichoblast	98.579
ccc1	Trichoblast	156.887
ccc1	Trichoblast	157.389
ccc1	Trichoblast	101.306
ccc1	Trichoblast	85.86
ccc1	Trichoblast	83.404
ccc1	Trichoblast	133.78
ccc1	Trichoblast	112.951
ccc1	Trichoblast	114.13
ccc1	Trichoblast	130.617
ccc1	Trichoblast	95.53
ccc1	Trichoblast	144.363
ccc1	Trichoblast	90.259
ccc1	Trichoblast	93.542
ccc1	Trichoblast	94.419
ccc1	Trichoblast	98.077
ccc1	Trichoblast	91.234
ccc1	Trichoblast	122.92
ccc1	Trichoblast	108.05
ccc1	Trichoblast	117.363
ccc1	Trichoblast	111.926
ccc1	Trichoblast	84.869
ccc2	Trichoblast	91.177
ccc2	Trichoblast	80.458
ccc2	Trichoblast	97.795
ccc2	Trichoblast	70.901
ccc2	Trichoblast	41.021
ccc2	Trichoblast	131.015
ccc2	Trichoblast	126.691
ccc2	Trichoblast	128.092
ccc2	Trichoblast	145.65
ccc2	Trichoblast	119.834
ccc2	Trichoblast	121.853
ccc2	Trichoblast	146.012
ccc2	Trichoblast	119.074
ccc2	Trichoblast	115.764
ccc2	Trichoblast	124.6
ccc2	Trichoblast	64.576
ccc2	Trichoblast	71.19
ccc2	Trichoblast	78.84
ccc2	Trichoblast	72.422
ccc2	Trichoblast	118.391
ccc2	Trichoblast	105.006
ccc2	Trichoblast	119.675
ccc2	Trichoblast	94.751
ccc2	Trichoblast	89.237
ccc2	Trichoblast	87.021
ccc2	Trichoblast	98.809
ccc2	Trichoblast	142.104
ccc2	Trichoblast	124.048
ccc2	Trichoblast	126.122
ccc2	Trichoblast	108.034
ccc2	Trichoblast	134.805
ccc2	Trichoblast	126.896
ccc2	Trichoblast	140.689
ccc2	Trichoblast	77.534
ccc2	Trichoblast	74.192
ccc2	Trichoblast	114.874
ccc2	Trichoblast	127.835
ccc2	Trichoblast	79.07
ccc2	Trichoblast	85.416
ccc2	Trichoblast	175.129
ccc2	Trichoblast	150.515
ccc2	Trichoblast	139.598
ccc2	Trichoblast	92.416
ccc2	Trichoblast	154.596
ccc2	Trichoblast	119.913
ccc2	Trichoblast	149.045
ccc2	Trichoblast	148.627
ccc2	Trichoblast	171.269
ccc2	Trichoblast	191.17
ccc2	Trichoblast	177.205
ccc2	Trichoblast	195.462
ccc2	Trichoblast	195.997
ccc2	Trichoblast	125.862
ccc2	Trichoblast	141.559
ccc2	Trichoblast	153.014
ccc2	Trichoblast	152.093
ccc2	Trichoblast	156.535
ccc2	Trichoblast	119.711
ccc2	Trichoblast	69.817
ccc2	Trichoblast	69.884
ccc2	Trichoblast	55.454
ccc2	Trichoblast	56.624
ccc2	Trichoblast	83.539
ccc2	Trichoblast	66.48
ccc2	Trichoblast	57.526
ccc2	Trichoblast	60.211
ccc2	Trichoblast	76.594
ccc2	Trichoblast	92.606
ccc2	Trichoblast	93.396
ccc2	Trichoblast	66.036
ccc2	Trichoblast	62.492
ccc2	Trichoblast	71.19
ccc2	Trichoblast	72.362
ccc2	Trichoblast	126.488
ccc2	Trichoblast	139.412
ccc2	Trichoblast	146.243
ccc2	Trichoblast	111.026
ccc2	Trichoblast	99.609
ccc2	Trichoblast	88.253
ccc2	Trichoblast	63.882
ccc2	Trichoblast	64.509
ccc2	Trichoblast	123.79
ccc2	Trichoblast	170.838
ccc2	Trichoblast	140.855
ccc2	Trichoblast	127.779
ccc2	Trichoblast	96.324
ccc2	Trichoblast	109.412
ccc2	Trichoblast	107.852
ccc2	Trichoblast	108.919
ccc2	Trichoblast	111.682
ccc2	Trichoblast	99.159
ccc2	Trichoblast	102.382
ccc2	Trichoblast	97.952
ccc2	Trichoblast	120.222
ccc2	Trichoblast	223.067
ccc2	Trichoblast	139.042
ccc2	Trichoblast	175.883
ccc2	Trichoblast	105.794
ccc2	Trichoblast	101.111
ccc2	Trichoblast	122.961
ccc2	Trichoblast	115.779
ccc2	Trichoblast	105.284
ccc2	Trichoblast	108.32
ccc2	Trichoblast	140.278
ccc2	Trichoblast	178.443
ccc2	Trichoblast	167.272
ccc2	Trichoblast	104.511
ccc2	Trichoblast	114.76
ccc2	Trichoblast	172.47
ccc2	Trichoblast	128.766
ccc2	Trichoblast	154.673
ccc2	Trichoblast	137.334
ccc2	Trichoblast	150.124
ccc2	Trichoblast	128.259
ccc2	Trichoblast	179.718
ccc2	Trichoblast	180.324
ccc2	Trichoblast	181.779
ccc2	Trichoblast	213.607
ccc2	Trichoblast	201.88
ccc2	Trichoblast	93.31
ccc2	Trichoblast	78.153
ccc2	Trichoblast	95.53
ccc2	Trichoblast	104.229
ccc2	Trichoblast	94.458
ccc2	Trichoblast	99.444
ccc2	Trichoblast	95.619
ccc2	Trichoblast	102.629
ccc2	Trichoblast	103.067
ccc2	Trichoblast	111.323
ccc2	Trichoblast	103.209
ccc2	Trichoblast	101.111
ccc2	Trichoblast	82.15
ccc2	Trichoblast	95.261
ccc2	Trichoblast	86.142
ccc2	Trichoblast	91.975
ccc2	Trichoblast	74.7
ccc2	Trichoblast	102.678
ccc2	Trichoblast	62.568
ccc2	Trichoblast	80.94
ccc2	Trichoblast	90.127
ccc2	Trichoblast	102.249
ccc2	Trichoblast	69.794
ccc2	Trichoblast	80.24
ccc2	Trichoblast	134.844
ccc2	Trichoblast	117.118
ccc2	Trichoblast	103.268
Wt	Atrichoblast	191.181
Wt	Atrichoblast	170.357
Wt	Atrichoblast	158.292
Wt	Atrichoblast	159.213
Wt	Atrichoblast	148.036
Wt	Atrichoblast	174.336
Wt	Atrichoblast	135.041
Wt	Atrichoblast	179.555
Wt	Atrichoblast	142.736
Wt	Atrichoblast	130.227
Wt	Atrichoblast	272.369
Wt	Atrichoblast	238.104
Wt	Atrichoblast	195.525
Wt	Atrichoblast	197.473
Wt	Atrichoblast	220.723
Wt	Atrichoblast	156.11
Wt	Atrichoblast	135.097
Wt	Atrichoblast	227.503
Wt	Atrichoblast	198.239
Wt	Atrichoblast	193.488
Wt	Atrichoblast	257.022
Wt	Atrichoblast	243.639
Wt	Atrichoblast	155.898
Wt	Atrichoblast	159.246
Wt	Atrichoblast	178.518
Wt	Atrichoblast	162.161
Wt	Atrichoblast	179.414
Wt	Atrichoblast	147.954
Wt	Atrichoblast	60.24
Wt	Atrichoblast	233.026
Wt	Atrichoblast	114.699
Wt	Atrichoblast	75.301
Wt	Atrichoblast	262.674
Wt	Atrichoblast	288.571
Wt	Atrichoblast	179.202
Wt	Atrichoblast	167.551
Wt	Atrichoblast	184.421
Wt	Atrichoblast	189.639
Wt	Atrichoblast	257.331
Wt	Atrichoblast	277.811
Wt	Atrichoblast	153.775
Wt	Atrichoblast	168.62
Wt	Atrichoblast	259.726
Wt	Atrichoblast	172.74
Wt	Atrichoblast	261.037
Wt	Atrichoblast	162.395
Wt	Atrichoblast	211.16
Wt	Atrichoblast	192.06
Wt	Atrichoblast	109.933
Wt	Atrichoblast	127.637
Wt	Atrichoblast	80.756
Wt	Atrichoblast	156.487
Wt	Atrichoblast	140.393
Wt	Atrichoblast	108.529
Wt	Atrichoblast	113.743
Wt	Atrichoblast	148.23
Wt	Atrichoblast	90.916
Wt	Atrichoblast	118.416
Wt	Atrichoblast	279.87
Wt	Atrichoblast	188.329
Wt	Atrichoblast	209.617
Wt	Atrichoblast	213.734
Wt	Atrichoblast	204.487
Wt	Atrichoblast	172.14
Wt	Atrichoblast	240.552
Wt	Atrichoblast	219.978
Wt	Atrichoblast	231.883
Wt	Atrichoblast	221.342
Wt	Atrichoblast	240.602
Wt	Atrichoblast	138.667
Wt	Atrichoblast	108.232
Wt	Atrichoblast	155.988
Wt	Atrichoblast	205.496
Wt	Atrichoblast	240.916
Wt	Atrichoblast	111.773
Wt	Atrichoblast	124.23
Wt	Atrichoblast	163.271
Wt	Atrichoblast	236.691
Wt	Atrichoblast	125.427
Wt	Atrichoblast	185.357
Wt	Atrichoblast	171.518
Wt	Atrichoblast	213.207
Wt	Atrichoblast	157.176
Wt	Atrichoblast	175.775
Wt	Atrichoblast	153.403
Wt	Atrichoblast	230.51
Wt	Atrichoblast	235.105
Wt	Atrichoblast	202.661
Wt	Atrichoblast	150.189
Wt	Atrichoblast	119.395
Wt	Atrichoblast	97.901
Wt	Atrichoblast	120.491
Wt	Atrichoblast	212.479
Wt	Atrichoblast	251.584
Wt	Atrichoblast	189.643
Wt	Atrichoblast	165.085
Wt	Atrichoblast	156.85
Wt	Atrichoblast	206.935
Wt	Atrichoblast	115.494
Wt	Atrichoblast	119.188
Wt	Atrichoblast	132.133
Wt	Atrichoblast	102.789
Wt	Atrichoblast	95.447
Wt	Atrichoblast	102.813
Wt	Atrichoblast	219.071
Wt	Atrichoblast	120.944
Wt	Atrichoblast	125.539
Wt	Atrichoblast	159.573
Wt	Atrichoblast	158.529
Wt	Atrichoblast	218.225
Wt	Atrichoblast	170.628
Wt	Atrichoblast	185.441
Wt	Atrichoblast	90.889
Wt	Atrichoblast	105.401
Wt	Atrichoblast	196.945
Wt	Atrichoblast	246.738
Wt	Atrichoblast	143.195
Wt	Atrichoblast	143.634
Wt	Atrichoblast	103.844
Wt	Atrichoblast	107.968
Wt	Atrichoblast	110.653
Wt	Atrichoblast	108.848
Wt	Atrichoblast	107.721
Wt	Atrichoblast	99.635
Wt	Atrichoblast	110.543
Wt	Atrichoblast	198.148
Wt	Atrichoblast	140.103
Wt	Atrichoblast	238.027
Wt	Atrichoblast	175.141
Wt	Atrichoblast	178.419
Wt	Atrichoblast	162.834
Wt	Atrichoblast	190.026
Wt	Atrichoblast	194.956
Wt	Atrichoblast	233.66
Wt	Atrichoblast	179.707
Wt	Atrichoblast	197.806
Wt	Atrichoblast	269.811
Wt	Atrichoblast	297.701
Wt	Atrichoblast	193.829
Wt	Atrichoblast	197.017
Wt	Atrichoblast	180.579
Wt	Atrichoblast	162.792
Wt	Atrichoblast	185.58
Wt	Atrichoblast	173.966
Wt	Atrichoblast	158.882
Wt	Atrichoblast	131.093
Wt	Atrichoblast	126.965
Wt	Atrichoblast	129.493
Wt	Atrichoblast	121.4
Wt	Atrichoblast	120.573
Wt	Atrichoblast	88.828
Wt	Atrichoblast	103.19
Wt	Atrichoblast	111.109
Wt	Atrichoblast	93.34
Wt	Atrichoblast	128.587
Wt	Atrichoblast	143.309
Wt	Atrichoblast	138.314
Wt	Atrichoblast	162.774
Wt	Atrichoblast	119.115
Wt	Atrichoblast	102.602
Wt	Atrichoblast	109.679
Wt	Atrichoblast	123.89
Wt	Atrichoblast	115.391
Wt	Atrichoblast	113.122
Wt	Atrichoblast	125.799
Wt	Atrichoblast	127.08
Wt	Atrichoblast	241.918
Wt	Atrichoblast	137.215
Wt	Atrichoblast	122.51
ccc1	Atrichoblast	67.491
ccc1	Atrichoblast	79.607
ccc1	Atrichoblast	45.382
ccc1	Atrichoblast	110.543
ccc1	Atrichoblast	108.01
ccc1	Atrichoblast	81.833
ccc1	Atrichoblast	95.594
ccc1	Atrichoblast	87.576
ccc1	Atrichoblast	89.651
ccc1	Atrichoblast	100.741
ccc1	Atrichoblast	211.494
ccc1	Atrichoblast	196.614
ccc1	Atrichoblast	140.855
ccc1	Atrichoblast	138.525
ccc1	Atrichoblast	106.235
ccc1	Atrichoblast	132.858
ccc1	Atrichoblast	150.591
ccc1	Atrichoblast	143.096
ccc1	Atrichoblast	134.959
ccc1	Atrichoblast	136.395
ccc1	Atrichoblast	137.215
ccc1	Atrichoblast	171.413
ccc1	Atrichoblast	147
ccc1	Atrichoblast	135.257
ccc1	Atrichoblast	128.858
ccc1	Atrichoblast	121.554
ccc1	Atrichoblast	165.41
ccc1	Atrichoblast	145.399
ccc1	Atrichoblast	151.246
ccc1	Atrichoblast	134.146
ccc1	Atrichoblast	220.696
ccc1	Atrichoblast	94.492
ccc1	Atrichoblast	113.297
ccc1	Atrichoblast	225.534
ccc1	Atrichoblast	182.369
ccc1	Atrichoblast	157.131
ccc1	Atrichoblast	188.238
ccc1	Atrichoblast	186.966
ccc1	Atrichoblast	88.434
ccc1	Atrichoblast	95.551
ccc1	Atrichoblast	83.381
ccc1	Atrichoblast	86.182
ccc1	Atrichoblast	85.152
ccc1	Atrichoblast	87.564
ccc1	Atrichoblast	167.747
ccc1	Atrichoblast	78.336
ccc1	Atrichoblast	66.457
ccc1	Atrichoblast	58.981
ccc1	Atrichoblast	62.302
ccc1	Atrichoblast	71.181
ccc1	Atrichoblast	73.431
ccc1	Atrichoblast	89.266
ccc1	Atrichoblast	96.297
ccc1	Atrichoblast	67.475
ccc1	Atrichoblast	72.362
ccc1	Atrichoblast	69.018
ccc1	Atrichoblast	77.709
ccc1	Atrichoblast	178.613
ccc1	Atrichoblast	145.553
ccc1	Atrichoblast	129.152
ccc1	Atrichoblast	121.234
ccc1	Atrichoblast	128.084
ccc1	Atrichoblast	153.588
ccc1	Atrichoblast	108.87
ccc1	Atrichoblast	106.891
ccc1	Atrichoblast	220.669
ccc1	Atrichoblast	172.895
ccc1	Atrichoblast	200.627
ccc1	Atrichoblast	240.293
ccc1	Atrichoblast	165.825
ccc1	Atrichoblast	156.148
ccc1	Atrichoblast	204.948
ccc1	Atrichoblast	187.779
ccc1	Atrichoblast	134.99
ccc1	Atrichoblast	150.2
ccc1	Atrichoblast	131.162
ccc1	Atrichoblast	120.223
ccc1	Atrichoblast	113.316
ccc1	Atrichoblast	138.518
ccc1	Atrichoblast	142.285
ccc1	Atrichoblast	136.373
ccc1	Atrichoblast	193.456
ccc1	Atrichoblast	202.098
ccc1	Atrichoblast	42.024
ccc1	Atrichoblast	32.654
ccc1	Atrichoblast	66.847
ccc1	Atrichoblast	95.966
ccc1	Atrichoblast	103.544
ccc1	Atrichoblast	99.919
ccc1	Atrichoblast	103.794
ccc1	Atrichoblast	66.685
ccc1	Atrichoblast	67.343
ccc1	Atrichoblast	51.524
ccc1	Atrichoblast	76.771
ccc1	Atrichoblast	105.45
ccc1	Atrichoblast	100.974
ccc1	Atrichoblast	63.631
ccc1	Atrichoblast	77.207
ccc1	Atrichoblast	182.377
ccc1	Atrichoblast	153.662
ccc1	Atrichoblast	125.353
ccc1	Atrichoblast	105.631
ccc1	Atrichoblast	145.751
ccc1	Atrichoblast	97.109
ccc1	Atrichoblast	89.672
ccc1	Atrichoblast	87.692
ccc1	Atrichoblast	114.712
ccc1	Atrichoblast	117.847
ccc1	Atrichoblast	100.276
ccc1	Atrichoblast	96.799
ccc1	Atrichoblast	113.783
ccc1	Atrichoblast	126.433
ccc1	Atrichoblast	152.778
ccc1	Atrichoblast	181.586
ccc1	Atrichoblast	171.357
ccc1	Atrichoblast	119.006
ccc1	Atrichoblast	121.943
ccc1	Atrichoblast	207.978
ccc1	Atrichoblast	101.15
ccc1	Atrichoblast	205.815
ccc1	Atrichoblast	176.034
ccc1	Atrichoblast	180.275
ccc1	Atrichoblast	163.577
ccc1	Atrichoblast	144.246
ccc1	Atrichoblast	164.222
ccc1	Atrichoblast	165.304
ccc1	Atrichoblast	132.882
ccc2	Atrichoblast	187.821
ccc2	Atrichoblast	172.477
ccc2	Atrichoblast	154.325
ccc2	Atrichoblast	159.249
ccc2	Atrichoblast	88.926
ccc2	Atrichoblast	120.505
ccc2	Atrichoblast	114.844
ccc2	Atrichoblast	112.084
ccc2	Atrichoblast	176.348
ccc2	Atrichoblast	188.636
ccc2	Atrichoblast	155.287
ccc2	Atrichoblast	139.782
ccc2	Atrichoblast	175.483
ccc2	Atrichoblast	167.988
ccc2	Atrichoblast	213.1
ccc2	Atrichoblast	159.109
ccc2	Atrichoblast	127.372
ccc2	Atrichoblast	127.143
ccc2	Atrichoblast	135.535
ccc2	Atrichoblast	137.969
ccc2	Atrichoblast	181.486
ccc2	Atrichoblast	215.422
ccc2	Atrichoblast	101.9
ccc2	Atrichoblast	198.597
ccc2	Atrichoblast	187.17
ccc2	Atrichoblast	197.69
ccc2	Atrichoblast	150.275
ccc2	Atrichoblast	172.467
ccc2	Atrichoblast	169.112
ccc2	Atrichoblast	321.986
ccc2	Atrichoblast	185.284
ccc2	Atrichoblast	104.822
ccc2	Atrichoblast	84.497
ccc2	Atrichoblast	68.291
ccc2	Atrichoblast	71.484
ccc2	Atrichoblast	81.539
ccc2	Atrichoblast	90.51
ccc2	Atrichoblast	122.63
ccc2	Atrichoblast	130.647
ccc2	Atrichoblast	143.567
ccc2	Atrichoblast	126.978
ccc2	Atrichoblast	114.215
ccc2	Atrichoblast	100.678
ccc2	Atrichoblast	109.44
ccc2	Atrichoblast	138.328
ccc2	Atrichoblast	113.006
ccc2	Atrichoblast	103.377
ccc2	Atrichoblast	171.349
ccc2	Atrichoblast	180.947
ccc2	Atrichoblast	180.288
ccc2	Atrichoblast	238.166
ccc2	Atrichoblast	181.15
ccc2	Atrichoblast	150.696
ccc2	Atrichoblast	139.058
ccc2	Atrichoblast	151.508
ccc2	Atrichoblast	280.105
ccc2	Atrichoblast	164.774
ccc2	Atrichoblast	206.025
ccc2	Atrichoblast	143.244
ccc2	Atrichoblast	159.768
ccc2	Atrichoblast	177.659
ccc2	Atrichoblast	196.538
ccc2	Atrichoblast	80.444
ccc2	Atrichoblast	97.907
ccc2	Atrichoblast	114.965
ccc2	Atrichoblast	109.44
ccc2	Atrichoblast	100.768
ccc2	Atrichoblast	127.915
ccc2	Atrichoblast	115.37
ccc2	Atrichoblast	111.275
ccc2	Atrichoblast	104.666
ccc2	Atrichoblast	156.728
ccc2	Atrichoblast	165.115
ccc2	Atrichoblast	152.67
ccc2	Atrichoblast	99.739
ccc2	Atrichoblast	127.162
ccc2	Atrichoblast	171.168
ccc2	Atrichoblast	171.454
ccc2	Atrichoblast	154.596
ccc2	Atrichoblast	149.322
ccc2	Atrichoblast	175.01
ccc2	Atrichoblast	154.105
ccc2	Atrichoblast	159.932
ccc2	Atrichoblast	191.583
ccc2	Atrichoblast	146.674
ccc2	Atrichoblast	129.61
ccc2	Atrichoblast	127.02
ccc2	Atrichoblast	108.459
ccc2	Atrichoblast	123.188
ccc2	Atrichoblast	119.442
ccc2	Atrichoblast	116.267
ccc2	Atrichoblast	146.619
ccc2	Atrichoblast	149.866
ccc2	Atrichoblast	138.037
ccc2	Atrichoblast	211.823
ccc2	Atrichoblast	206.231
ccc2	Atrichoblast	163.064
ccc2	Atrichoblast	183.518

## Sheet: Fig2D
Line	Treatment	Length
Wt	Untreated	59.197
Wt	Untreated	61.672
Wt	Untreated	83.58
Wt	Untreated	80.962
Wt	Untreated	94.872
Wt	Untreated	62.017
Wt	Untreated	81.911
Wt	Untreated	74.37
Wt	Untreated	101.832
Wt	Untreated	62.017
Wt	Untreated	80.729
Wt	Untreated	64.218
Wt	Untreated	105.253
Wt	Untreated	39.764
Wt	Untreated	25.928
Wt	Untreated	186.432
Wt	Untreated	125.038
Wt	Untreated	69.527
Wt	Untreated	149.38
Wt	Untreated	109.629
Wt	Untreated	140.166
Wt	Untreated	94.846
Wt	Untreated	177.591
Wt	Untreated	86.05
Wt	Untreated	52.814
Wt	Untreated	157.671
Wt	Untreated	109.163
Wt	Untreated	99.91
Wt	Untreated	91.467
Wt	Untreated	65.435
Wt	Untreated	110.859
Wt	Untreated	88.527
Wt	Untreated	84.742
Wt	Untreated	24.893
Wt	Untreated	60.379
Wt	Untreated	84.897
Wt	Untreated	87.377
Wt	Untreated	86.849
Wt	Untreated	87.518
Wt	Untreated	55.351
Wt	Untreated	55.366
Wt	Untreated	120.574
Wt	Untreated	155.715
Wt	Untreated	171.551
Wt	Untreated	131.027
Wt	Untreated	113.901
Wt	Untreated	78.446
Wt	Untreated	80.729
Wt	Untreated	13.808
Wt	Untreated	82.62
Wt	Untreated	53.571
Wt	Untreated	85.706
Wt	Untreated	75.641
Wt	Untreated	65.498
Wt	Untreated	44.263
Wt	Untreated	60.948
Wt	Untreated	43.609
Wt	Untreated	50.523
Wt	Untreated	51.426
Wt	Untreated	47.453
Wt	Untreated	39.764
Wt	Untreated	28.811
Wt	Untreated	77.455
Wt	Untreated	100.402
Wt	Untreated	87.264
Wt	Untreated	114.304
Wt	Untreated	113.648
Wt	Untreated	155.043
Wt	Untreated	124.068
Wt	Untreated	79.487
Wt	Untreated	124.775
Wt	Untreated	194.306
Wt	Untreated	171.967
Wt	Untreated	173.698
Wt	Untreated	116.695
Wt	Untreated	152.046
Wt	Untreated	127.852
Wt	Untreated	195.823
Wt	Untreated	175.28
Wt	Untreated	174.439
Wt	Untreated	156.746
Wt	Untreated	222.627
Wt	Untreated	104.351
Wt	Untreated	106.441
Wt	Untreated	153.659
Wt	Untreated	64.422
Wt	Untreated	48.819
Wt	Untreated	69.385
Wt	Untreated	29.235
Wt	Untreated	70.804
Wt	Untreated	65.498
Wt	Untreated	46.79
Wt	Untreated	138.805
Wt	Untreated	75.118
Wt	Untreated	120.048
Wt	Untreated	122.286
Wt	Untreated	139.62
Wt	Untreated	91.026
Wt	Untreated	30.876
Wt	Untreated	213.39
Wt	Untreated	126.531
Wt	Untreated	110.223
Wt	Untreated	122.873
Wt	Untreated	85.714
Wt	Untreated	68.116
Wt	Untreated	73.724
Wt	Untreated	34.754
Wt	Untreated	20.408
Wt	Untreated	71.545
Wt	Untreated	112.56
Wt	Untreated	108.624
Wt	Untreated	144.25
Wt	Untreated	48.98
Wt	Untreated	102.631
Wt	Untreated	47.774
Wt	Untreated	60.678
Wt	Untreated	27.758
Wt	Untreated	44.944
Wt	Untreated	56.704
Wt	Untreated	60.883
Wt	Untreated	95.657
Wt	Untreated	118.103
Wt	Untreated	84.565
Wt	Untreated	94.232
Wt	Untreated	136.902
Wt	Untreated	176.327
Wt	Untreated	145.128
Wt	Untreated	166.11
Wt	Untreated	180.989
Wt	Untreated	168.587
Wt	Untreated	113.15
Wt	Untreated	96.005
Wt	Untreated	26.135
Wt	Untreated	43.818
Wt	Untreated	77.658
Wt	Untreated	59.5
Wt	Untreated	100.187
Wt	Untreated	100.083
Wt	Untreated	103.036
Wt	Untreated	106.436
Wt	Untreated	64.439
Wt	Untreated	83.274
Wt	Untreated	98.489
Wt	Untreated	67.347
Wt	Untreated	81.684
Wt	Untreated	94.232
Wt	Untreated	131.391
Wt	Untreated	106.475
Wt	Untreated	59.5
Wt	Untreated	78.829
Wt	Untreated	100.519
Wt	Untreated	76.497
Wt	Untreated	85.251
Wt	Untreated	102.041
Wt	Untreated	97.469
Wt	Untreated	136.139
Wt	Untreated	112.319
Wt	Untreated	80.528
ccc1	Untreated	41.106
ccc1	Untreated	31.43
ccc1	Untreated	76.333
ccc1	Untreated	30.796
ccc1	Untreated	45.526
ccc1	Untreated	60.596
ccc1	Untreated	47.505
ccc1	Untreated	162.269
ccc1	Untreated	38.547
ccc1	Untreated	33.944
ccc1	Untreated	55.854
ccc1	Untreated	118.394
ccc1	Untreated	120.103
ccc1	Untreated	104.044
ccc1	Untreated	94.019
ccc1	Untreated	24.893
ccc1	Untreated	34.71
ccc1	Untreated	76.204
ccc1	Untreated	65.923
ccc1	Untreated	19.401
ccc1	Untreated	78.247
ccc1	Untreated	33.554
ccc1	Untreated	96.521
ccc1	Untreated	34.71
ccc1	Untreated	107.791
ccc1	Untreated	87.217
ccc1	Untreated	62.873
ccc1	Untreated	27.196
ccc1	Untreated	46.79
ccc1	Untreated	21.222
ccc1	Untreated	31.43
ccc1	Untreated	109.726
ccc1	Untreated	134.67
ccc1	Untreated	78.583
ccc1	Untreated	19.903
ccc1	Untreated	59.1
ccc1	Untreated	23.113
ccc1	Untreated	47.436
ccc1	Untreated	52.061
ccc1	Untreated	87.64
ccc1	Untreated	207.756
ccc1	Untreated	116.674
ccc1	Untreated	62.821
ccc1	Untreated	99.39
ccc1	Untreated	96.162
ccc1	Untreated	163.982
ccc1	Untreated	105.627
ccc1	Untreated	100.5
ccc1	Untreated	72.524
ccc1	Untreated	69.243
ccc1	Untreated	50.507
ccc1	Untreated	65.998
ccc1	Untreated	25.545
ccc1	Untreated	83.688
ccc1	Untreated	108.21
ccc1	Untreated	151.743
ccc1	Untreated	183.835
ccc1	Untreated	142.608
ccc1	Untreated	34.137
ccc1	Untreated	162.841
ccc1	Untreated	89.972
ccc1	Untreated	127.569
ccc1	Untreated	87.217
ccc1	Untreated	125.281
ccc1	Untreated	95.811
ccc1	Untreated	78.047
ccc1	Untreated	121.491
ccc1	Untreated	60.637
ccc1	Untreated	134.713
ccc1	Untreated	48.056
ccc1	Untreated	40.481
ccc1	Untreated	98.726
ccc1	Untreated	25.928
ccc1	Untreated	87.781
ccc1	Untreated	26.149
ccc1	Untreated	52.58
ccc1	Untreated	29.487
ccc1	Untreated	56.932
ccc1	Untreated	79.529
ccc1	Untreated	107.708
ccc1	Untreated	125.471
ccc1	Untreated	136.193
ccc1	Untreated	146.429
ccc1	Untreated	61.871
ccc1	Untreated	94.15
ccc1	Untreated	96.367
ccc1	Untreated	7.798
ccc1	Untreated	46.172
ccc1	Untreated	39.764
ccc1	Untreated	46.225
ccc1	Untreated	128.372
ccc1	Untreated	114.045
ccc1	Untreated	51.681
ccc1	Untreated	65.385
ccc1	Untreated	73.122
ccc1	Untreated	65.133
ccc1	Untreated	40.073
ccc1	Untreated	81.78
ccc1	Untreated	40.481
ccc1	Untreated	71.428
ccc1	Untreated	70.618
ccc1	Untreated	67.305
ccc1	Untreated	34.065
ccc1	Untreated	15.438
ccc1	Untreated	54.226
ccc1	Untreated	47.712
ccc1	Untreated	84.625
ccc1	Untreated	10.336
ccc1	Untreated	9.333
ccc1	Untreated	103.878
ccc1	Untreated	97.571
ccc1	Untreated	89.753
ccc1	Untreated	101.315
ccc1	Untreated	41.046
ccc1	Untreated	63.029
ccc1	Untreated	71.669
ccc1	Untreated	55.128
ccc1	Untreated	64.115
ccc1	Untreated	126.293
ccc1	Untreated	31.716
ccc1	Untreated	55.262
ccc1	Untreated	14.618
ccc1	Untreated	95.01
ccc1	Untreated	66.184
ccc1	Untreated	89.78
ccc1	Untreated	33.284
ccc1	Untreated	42.617
ccc1	Untreated	22.39
ccc1	Untreated	122.038
ccc1	Untreated	66.667
ccc1	Untreated	104.131
ccc1	Untreated	106.441
ccc1	Untreated	50.148
ccc1	Untreated	95.295
ccc1	Untreated	112.148
ccc1	Untreated	61.672
ccc1	Untreated	125.648
ccc1	Untreated	46.314
ccc1	Untreated	127.743
ccc1	Untreated	46.438
ccc1	Untreated	34.828
ccc1	Untreated	34.615
ccc1	Untreated	64.218
ccc1	Untreated	34.828
ccc1	Untreated	30.796
ccc1	Untreated	20.87
ccc1	Untreated	72.524
ccc1	Untreated	33.726
ccc1	Untreated	92.743
ccc1	Untreated	106.649
ccc1	Untreated	97.436
ccc1	Untreated	60.637
ccc1	Untreated	58.146
ccc1	Untreated	73.804
ccc1	Untreated	70.186
ccc1	Untreated	68.718
ccc1	Untreated	36.262
ccc1	Untreated	74.359
ccc1	Untreated	132.802
ccc1	Untreated	46.172
ccc1	Untreated	49.538
ccc1	Untreated	49.538
ccc1	Untreated	38.802
ccc1	Untreated	83.481
ccc1	Untreated	112.273
ccc1	Untreated	51.856
ccc1	Untreated	57.335
ccc1	Untreated	82.061
ccc1	Untreated	29.737
ccc1	Untreated	52.954
ccc1	Untreated	210.772
ccc1	Untreated	180.514
ccc1	Untreated	45.814
ccc1	Untreated	36.712
ccc1	Untreated	90.191
ccc1	Untreated	60.093
ccc1	Untreated	119.918
ccc1	Untreated	71.451
ccc1	Untreated	62.834
ccc1	Untreated	62.611
ccc1	Untreated	99.249
ccc1	Untreated	88.499
ccc1	Untreated	61.752
ccc1	Untreated	62.86
ccc1	Untreated	63.251
ccc1	Untreated	59.1
ccc1	Untreated	28.234
ccc1	Untreated	118.178
ccc1	Untreated	65.284
ccc1	Untreated	27.045
ccc1	Untreated	47.592
ccc1	Untreated	143.039
ccc1	Untreated	49.022
ccc1	Untreated	67.84
ccc1	Untreated	40.199
ccc1	Untreated	76.251
ccc1	Untreated	23.269
ccc1	Untreated	87.85
ccc1	Untreated	29.22
ccc1	Untreated	75.51
ccc1	Untreated	74.175
ccc1	Untreated	61.224
ccc1	Untreated	90.627
ccc1	Untreated	71.429
ccc1	Untreated	75.538
ccc1	Untreated	96.005
ccc1	Untreated	118.385
ccc1	Untreated	49.655
ccc1	Untreated	30.68
ccc1	Untreated	22.449
ccc1	Untreated	72.471
ccc1	Untreated	71.458
ccc1	Untreated	140.949
ccc1	Untreated	21.98
ccc1	Untreated	70.46
ccc1	Untreated	67.471
ccc1	Untreated	40.663
ccc1	Untreated	43.628
ccc1	Untreated	55.703
ccc1	Untreated	42.857
ccc1	Untreated	20.812
ccc1	Untreated	63.397
ccc1	Untreated	87.968
ccc1	Untreated	77.658
ccc1	Untreated	94.232
ccc1	Untreated	61.36
ccc1	Untreated	64.439
ccc1	Untreated	87.755
ccc1	Untreated	73.498
ccc1	Untreated	80.243
ccc1	Untreated	122.517
ccc1	Untreated	61.258
ccc1	Untreated	69.418
ccc1	Untreated	119.226
ccc1	Untreated	109.617
ccc1	Untreated	87.779
ccc1	Untreated	55.14
ccc1	Untreated	127.335
ccc1	Untreated	146.939
ccc1	Untreated	179.696
ccc1	Untreated	165.092
ccc1	Untreated	96.46
ccc1	Untreated	44.944
ccc1	Untreated	34.694
ccc1	Untreated	74.845
ccc1	Untreated	57.143
ccc1	Untreated	115.446
ccc1	Untreated	93.633
ccc1	Untreated	50.487
ccc1	Untreated	90.004
ccc1	Untreated	132.166
ccc1	Untreated	32.907
ccc1	Untreated	49.022
ccc1	Untreated	45.634
ccc1	Untreated	80.191
ccc1	Untreated	59.184
ccc1	Untreated	59.184
ccc1	Untreated	40.867
ccc1	Untreated	95.94
ccc1	Untreated	112.078
ccc1	Untreated	67.625
ccc1	Untreated	102.122
ccc2	Untreated	71.978
ccc2	Untreated	56.425
ccc2	Untreated	17.994
ccc2	Untreated	62.873
ccc2	Untreated	69.81
ccc2	Untreated	61.552
ccc2	Untreated	70.653
ccc2	Untreated	68.539
ccc2	Untreated	52.954
ccc2	Untreated	33.726
ccc2	Untreated	41.741
ccc2	Untreated	56.235
ccc2	Untreated	70.139
ccc2	Untreated	86.593
ccc2	Untreated	79.373
ccc2	Untreated	55.618
ccc2	Untreated	38.247
ccc2	Untreated	63.134
ccc2	Untreated	23.951
ccc2	Untreated	33.847
ccc2	Untreated	19.401
ccc2	Untreated	105.853
ccc2	Untreated	87.64
ccc2	Untreated	43.853
ccc2	Untreated	24.393
ccc2	Untreated	33.284
ccc2	Untreated	51.951
ccc2	Untreated	64.218
ccc2	Untreated	26.923
ccc2	Untreated	79.529
ccc2	Untreated	57.707
ccc2	Untreated	118.394
ccc2	Untreated	134.218
ccc2	Untreated	117.194
ccc2	Untreated	139.337
ccc2	Untreated	138.61
ccc2	Untreated	132.449
ccc2	Untreated	107.761
ccc2	Untreated	62.873
ccc2	Untreated	87.264
ccc2	Untreated	98.276
ccc2	Untreated	44.872
ccc2	Untreated	31.194
ccc2	Untreated	97.039
ccc2	Untreated	59.1
ccc2	Untreated	59.322
ccc2	Untreated	59.474
ccc2	Untreated	37.002
ccc2	Untreated	45.036
ccc2	Untreated	33.944
ccc2	Untreated	22.39
ccc2	Untreated	16.064
ccc2	Untreated	37.967
ccc2	Untreated	32.154
ccc2	Untreated	25.188
ccc2	Untreated	45.164
ccc2	Untreated	64.103
ccc2	Untreated	39.929
ccc2	Untreated	61.123
ccc2	Untreated	47.505
ccc2	Untreated	72.58
ccc2	Untreated	54.769
ccc2	Untreated	94.089
ccc2	Untreated	56.773
ccc2	Untreated	46.667
ccc2	Untreated	79.827
ccc2	Untreated	48.51
ccc2	Untreated	79.592
ccc2	Untreated	137.963
ccc2	Untreated	133.045
ccc2	Untreated	54.033
ccc2	Untreated	49.361
ccc2	Untreated	167.658
ccc2	Untreated	146.953
ccc2	Untreated	77.551
ccc2	Untreated	115.608
ccc2	Untreated	81.658
ccc2	Untreated	122.449
ccc2	Untreated	161.341
ccc2	Untreated	80.009
ccc2	Untreated	106.064
ccc2	Untreated	69.418
ccc2	Untreated	56.924
ccc2	Untreated	93.878
ccc2	Untreated	103.036
ccc2	Untreated	85.933
ccc2	Untreated	53.685
ccc2	Untreated	130.517
ccc2	Untreated	114.577
ccc2	Untreated	91.859
ccc2	Untreated	112.319
ccc2	Untreated	150.537
ccc2	Untreated	52.469
ccc2	Untreated	55.703
ccc2	Untreated	52.667
ccc2	Untreated	51.183
ccc2	Untreated	53.218
ccc2	Untreated	134.152
ccc2	Untreated	117.484
ccc2	Untreated	147.843
ccc2	Untreated	61.394
ccc2	Untreated	148.349
ccc2	Untreated	112.412
ccc2	Untreated	136.796
ccc2	Untreated	101.673
ccc2	Untreated	55.441
ccc2	Untreated	65.21
ccc2	Untreated	73.469
ccc2	Untreated	44.944
ccc2	Untreated	40.816
ccc2	Untreated	100.333
ccc2	Untreated	131.897
ccc2	Untreated	64.083
ccc2	Untreated	73.498
ccc2	Untreated	59.324
ccc2	Untreated	93.9
ccc2	Untreated	55.14
ccc2	Untreated	55.14
ccc2	Untreated	68.451
ccc2	Untreated	57.288
ccc2	Untreated	171.671
ccc2	Untreated	53.218
ccc2	Untreated	126.531
ccc2	Untreated	80.864
ccc2	Untreated	100.519
ccc2	Untreated	73.583
ccc2	Untreated	67.471
ccc2	Untreated	86.32
ccc2	Untreated	75.262
ccc2	Untreated	93.254
ccc2	Untreated	61.258
ccc2	Untreated	74.287
ccc2	Untreated	63.034
ccc2	Untreated	100.747
ccc2	Untreated	168.846
ccc2	Untreated	153.333
ccc2	Untreated	102.041
ccc2	Untreated	77.658
ccc2	Untreated	111.032
ccc2	Untreated	72.327
ccc2	Untreated	31.218
ccc2	Untreated	79.618
ccc2	Untreated	26.531
ccc2	Untreated	44.572
Wt	Mannitol	47.574
Wt	Mannitol	81.911
Wt	Mannitol	56.643
Wt	Mannitol	67.451
Wt	Mannitol	96.35
Wt	Mannitol	65.923
Wt	Mannitol	37.531
Wt	Mannitol	16.716
Wt	Mannitol	23.395
Wt	Mannitol	17.994
Wt	Mannitol	62.873
Wt	Mannitol	157.739
Wt	Mannitol	183.297
Wt	Mannitol	216.682
Wt	Mannitol	113.648
Wt	Mannitol	122.125
Wt	Mannitol	25.673
Wt	Mannitol	57.749
Wt	Mannitol	46.172
Wt	Mannitol	31.194
Wt	Mannitol	51.282
Wt	Mannitol	70.931
Wt	Mannitol	62.938
Wt	Mannitol	116.772
Wt	Mannitol	32.281
Wt	Mannitol	82.421
Wt	Mannitol	71.116
Wt	Mannitol	87.33
Wt	Mannitol	105.323
Wt	Mannitol	115.242
Wt	Mannitol	85.523
Wt	Mannitol	66.519
Wt	Mannitol	124.775
Wt	Mannitol	23.57
Wt	Mannitol	47.643
Wt	Mannitol	12.821
Wt	Mannitol	19.273
Wt	Mannitol	20.712
Wt	Mannitol	19.57
Wt	Mannitol	22.39
Wt	Mannitol	54.589
Wt	Mannitol	17.994
Wt	Mannitol	33.944
Wt	Mannitol	74.756
Wt	Mannitol	48.277
Wt	Mannitol	20.553
Wt	Mannitol	54.589
Wt	Mannitol	68.25
Wt	Mannitol	37.728
Wt	Mannitol	31.22
Wt	Mannitol	77.19
Wt	Mannitol	137.09
Wt	Mannitol	23.64
Wt	Mannitol	93.905
Wt	Mannitol	95.295
Wt	Mannitol	55.971
Wt	Mannitol	48.26
Wt	Mannitol	103.973
Wt	Mannitol	89.753
Wt	Mannitol	51.426
Wt	Mannitol	52.061
Wt	Mannitol	49.786
Wt	Mannitol	15.597
Wt	Mannitol	12.627
Wt	Mannitol	54.226
Wt	Mannitol	122.763
Wt	Mannitol	39.328
Wt	Mannitol	57.749
Wt	Mannitol	73.077
Wt	Mannitol	65.585
Wt	Mannitol	16.716
Wt	Mannitol	56.541
Wt	Mannitol	52.58
Wt	Mannitol	46.225
Wt	Mannitol	56.643
Wt	Mannitol	26.954
Wt	Mannitol	44.263
Wt	Mannitol	85.821
Wt	Mannitol	63.364
Wt	Mannitol	102.631
Wt	Mannitol	49.361
Wt	Mannitol	82.04
Wt	Mannitol	8.415
Wt	Mannitol	10.204
Wt	Mannitol	29.715
Wt	Mannitol	57.47
Wt	Mannitol	125.44
Wt	Mannitol	221.257
Wt	Mannitol	176.94
Wt	Mannitol	75.538
Wt	Mannitol	59.744
Wt	Mannitol	48.98
Wt	Mannitol	41.02
Wt	Mannitol	26.531
Wt	Mannitol	26.531
Wt	Mannitol	26.609
Wt	Mannitol	30.339
Wt	Mannitol	12.907
Wt	Mannitol	33.222
Wt	Mannitol	6.122
Wt	Mannitol	10.99
Wt	Mannitol	42.906
Wt	Mannitol	56.039
Wt	Mannitol	43.628
Wt	Mannitol	68.451
Wt	Mannitol	12.245
Wt	Mannitol	89.796
Wt	Mannitol	198.631
Wt	Mannitol	177.739
Wt	Mannitol	260.69
Wt	Mannitol	140.713
Wt	Mannitol	16.327
Wt	Mannitol	10.406
Wt	Mannitol	36.735
Wt	Mannitol	18.48
Wt	Mannitol	15.542
Wt	Mannitol	49.361
Wt	Mannitol	25.815
Wt	Mannitol	78.113
Wt	Mannitol	15.542
Wt	Mannitol	14.857
Wt	Mannitol	62.069
Wt	Mannitol	46.627
Wt	Mannitol	24.659
Wt	Mannitol	66.85
Wt	Mannitol	83.773
Wt	Mannitol	66.444
Wt	Mannitol	99.31
Wt	Mannitol	104.581
Wt	Mannitol	26.843
Wt	Mannitol	117.484
Wt	Mannitol	95.657
Wt	Mannitol	159.236
Wt	Mannitol	92.041
Wt	Mannitol	29.22
Wt	Mannitol	30.883
Wt	Mannitol	12.245
Wt	Mannitol	12.414
Wt	Mannitol	17.437
Wt	Mannitol	15.542
Wt	Mannitol	25.815
Wt	Mannitol	47.643
Wt	Mannitol	39.625
Wt	Mannitol	29.22
Wt	Mannitol	18.254
Wt	Mannitol	20.1
Wt	Mannitol	18.254
Wt	Mannitol	33.222
Wt	Mannitol	63.79
Wt	Mannitol	32.717
ccc1	Mannitol	19.528
ccc1	Mannitol	38.483
ccc1	Mannitol	70.233
ccc1	Mannitol	50.409
ccc1	Mannitol	51.089
ccc1	Mannitol	55.069
ccc1	Mannitol	83.136
ccc1	Mannitol	59.64
ccc1	Mannitol	81.216
ccc1	Mannitol	133.727
ccc1	Mannitol	31.716
ccc1	Mannitol	14.161
ccc1	Mannitol	177.322
ccc1	Mannitol	145.861
ccc1	Mannitol	172.43
ccc1	Mannitol	68.539
ccc1	Mannitol	76.516
ccc1	Mannitol	110.465
ccc1	Mannitol	67.961
ccc1	Mannitol	73.257
ccc1	Mannitol	66.925
ccc1	Mannitol	65.998
ccc1	Mannitol	79.611
ccc1	Mannitol	23.219
ccc1	Mannitol	54.105
ccc1	Mannitol	158.498
ccc1	Mannitol	138.063
ccc1	Mannitol	39.764
ccc1	Mannitol	186.18
ccc1	Mannitol	23.951
ccc1	Mannitol	11.609
ccc1	Mannitol	87.217
ccc1	Mannitol	81.023
ccc1	Mannitol	99.075
ccc1	Mannitol	33.358
ccc1	Mannitol	83.991
ccc1	Mannitol	71.841
ccc1	Mannitol	133.555
ccc1	Mannitol	116.674
ccc1	Mannitol	189.314
ccc1	Mannitol	140.166
ccc1	Mannitol	181.296
ccc1	Mannitol	173.082
ccc1	Mannitol	182.056
ccc1	Mannitol	200.497
ccc1	Mannitol	137.843
ccc1	Mannitol	80.962
ccc1	Mannitol	57.235
ccc1	Mannitol	202.601
ccc1	Mannitol	183.203
ccc1	Mannitol	169.352
ccc1	Mannitol	148.988
ccc1	Mannitol	70.977
ccc1	Mannitol	73.178
ccc1	Mannitol	51.298
ccc1	Mannitol	62.873
ccc1	Mannitol	94.872
ccc1	Mannitol	64.918
ccc1	Mannitol	157.296
ccc1	Mannitol	133.61
ccc1	Mannitol	84.518
ccc1	Mannitol	177.614
ccc1	Mannitol	155.208
ccc1	Mannitol	42.617
ccc1	Mannitol	93.625
ccc1	Mannitol	207.094
ccc1	Mannitol	170.903
ccc1	Mannitol	107.455
ccc1	Mannitol	155.319
ccc1	Mannitol	25.673
ccc1	Mannitol	22.427
ccc1	Mannitol	42.791
ccc1	Mannitol	92.876
ccc1	Mannitol	135.498
ccc1	Mannitol	130.599
ccc1	Mannitol	49.868
ccc1	Mannitol	90.655
ccc1	Mannitol	80.535
ccc1	Mannitol	109.883
ccc1	Mannitol	47.712
ccc1	Mannitol	16.064
ccc1	Mannitol	92.53
ccc1	Mannitol	40.257
ccc1	Mannitol	145.596
ccc1	Mannitol	81.135
ccc1	Mannitol	96.555
ccc1	Mannitol	157.322
ccc1	Mannitol	134.279
ccc1	Mannitol	164.103
ccc1	Mannitol	139.891
ccc1	Mannitol	184.687
ccc1	Mannitol	91.251
ccc1	Mannitol	88.61
ccc1	Mannitol	104.799
ccc1	Mannitol	107.111
ccc1	Mannitol	26.954
ccc1	Mannitol	86.764
ccc1	Mannitol	144.332
ccc1	Mannitol	66.888
ccc1	Mannitol	85.783
ccc1	Mannitol	73.122
ccc1	Mannitol	167.714
ccc1	Mannitol	145.438
ccc1	Mannitol	76.634
ccc1	Mannitol	120.185
ccc1	Mannitol	160.507
ccc1	Mannitol	171.532
ccc1	Mannitol	130.669
ccc1	Mannitol	130
ccc1	Mannitol	60.352
ccc1	Mannitol	84.654
ccc1	Mannitol	71.909
ccc1	Mannitol	107.341
ccc1	Mannitol	117.516
ccc1	Mannitol	150.912
ccc1	Mannitol	106.48
ccc1	Mannitol	86.669
ccc1	Mannitol	74.591
ccc1	Mannitol	78.512
ccc1	Mannitol	73.271
ccc1	Mannitol	18.815
ccc1	Mannitol	75.758
ccc1	Mannitol	86.897
ccc1	Mannitol	115.446
ccc1	Mannitol	69.866
ccc1	Mannitol	101.488
ccc1	Mannitol	119.784
ccc1	Mannitol	79.618
ccc1	Mannitol	47.116
ccc1	Mannitol	19.361
ccc1	Mannitol	14.431
ccc1	Mannitol	12.907
ccc1	Mannitol	54.951
ccc1	Mannitol	65.814
ccc1	Mannitol	56.924
ccc1	Mannitol	95.94
ccc1	Mannitol	114.904
ccc1	Mannitol	81.479
ccc1	Mannitol	21.011
ccc1	Mannitol	49.697
ccc1	Mannitol	93.633
ccc1	Mannitol	136.139
ccc1	Mannitol	68.451
ccc1	Mannitol	119.593
ccc1	Mannitol	227.402
ccc1	Mannitol	174.236
ccc1	Mannitol	25.244
ccc1	Mannitol	29.22
ccc1	Mannitol	23.269
ccc1	Mannitol	61.36
ccc1	Mannitol	77.578
ccc1	Mannitol	83.773
ccc1	Mannitol	85.714
ccc1	Mannitol	45.083
ccc1	Mannitol	128.717
ccc1	Mannitol	154.47
ccc1	Mannitol	77.255
ccc1	Mannitol	32.907
ccc1	Mannitol	54.913
ccc1	Mannitol	38.506
ccc1	Mannitol	23.8
ccc1	Mannitol	37.464
ccc1	Mannitol	69.057
ccc1	Mannitol	133.045
ccc1	Mannitol	29.715
ccc1	Mannitol	53.685
ccc1	Mannitol	25.571
ccc1	Mannitol	157.619
ccc1	Mannitol	19.361
ccc1	Mannitol	36.507
ccc1	Mannitol	192.584
ccc1	Mannitol	195.034
ccc1	Mannitol	183.276
ccc1	Mannitol	51.02
ccc1	Mannitol	24.49
ccc1	Mannitol	59.219
ccc1	Mannitol	61.36
ccc1	Mannitol	20.812
ccc1	Mannitol	150.661
ccc1	Mannitol	155.102
ccc1	Mannitol	158.935
ccc1	Mannitol	271.429
ccc1	Mannitol	211.153
ccc1	Mannitol	65.719
ccc1	Mannitol	173.169
ccc1	Mannitol	139.509
ccc1	Mannitol	114.94
ccc1	Mannitol	161.431
ccc1	Mannitol	63.397
ccc1	Mannitol	57.288
ccc1	Mannitol	166.823
ccc1	Mannitol	224.833
ccc1	Mannitol	85.666
ccc1	Mannitol	184.081
ccc1	Mannitol	82.04
ccc1	Mannitol	191.674
ccc1	Mannitol	156.092
ccc1	Mannitol	152.502
ccc1	Mannitol	81.964
ccc1	Mannitol	182.639
ccc1	Mannitol	193.716
ccc1	Mannitol	71.661
ccc1	Mannitol	111.032
ccc1	Mannitol	111.407
ccc1	Mannitol	93.076
ccc1	Mannitol	61.258
ccc2	Mannitol	35.204
ccc2	Mannitol	106.903
ccc2	Mannitol	101.095
ccc2	Mannitol	61.538
ccc2	Mannitol	20.672
ccc2	Mannitol	114.218
ccc2	Mannitol	84.703
ccc2	Mannitol	52.58
ccc2	Mannitol	32.154
ccc2	Mannitol	32.077
ccc2	Mannitol	37.967
ccc2	Mannitol	68.13
ccc2	Mannitol	21.833
ccc2	Mannitol	193.42
ccc2	Mannitol	147.992
ccc2	Mannitol	174.872
ccc2	Mannitol	11.609
ccc2	Mannitol	12.095
ccc2	Mannitol	41.424
ccc2	Mannitol	14.103
ccc2	Mannitol	141.107
ccc2	Mannitol	46.172
ccc2	Mannitol	180.696
ccc2	Mannitol	21.795
ccc2	Mannitol	25.673
ccc2	Mannitol	74.425
ccc2	Mannitol	107.111
ccc2	Mannitol	69.986
ccc2	Mannitol	53.983
ccc2	Mannitol	115.135
ccc2	Mannitol	93.625
ccc2	Mannitol	95.183
ccc2	Mannitol	83.047
ccc2	Mannitol	159.227
ccc2	Mannitol	42.791
ccc2	Mannitol	23.219
ccc2	Mannitol	113.199
ccc2	Mannitol	86.241
ccc2	Mannitol	123.104
ccc2	Mannitol	82.091
ccc2	Mannitol	81.488
ccc2	Mannitol	98.851
ccc2	Mannitol	49.149
ccc2	Mannitol	14.431
ccc2	Mannitol	30.612
ccc2	Mannitol	40.663
ccc2	Mannitol	32.97
ccc2	Mannitol	63.397
ccc2	Mannitol	20.408
ccc2	Mannitol	110.374
ccc2	Mannitol	123.819
ccc2	Mannitol	106.142
ccc2	Mannitol	119.488
ccc2	Mannitol	94.871
ccc2	Mannitol	114.94
ccc2	Mannitol	109.103
ccc2	Mannitol	109.617
ccc2	Mannitol	142.872
ccc2	Mannitol	127.808
ccc2	Mannitol	70.371
ccc2	Mannitol	166.549
ccc2	Mannitol	182.559
ccc2	Mannitol	169.695
ccc2	Mannitol	173.793
ccc2	Mannitol	185.994
ccc2	Mannitol	84.663
ccc2	Mannitol	72.471
ccc2	Mannitol	22.449
ccc2	Mannitol	20.408
ccc2	Mannitol	33.222
ccc2	Mannitol	25.815
ccc2	Mannitol	16.327
ccc2	Mannitol	147.688
ccc2	Mannitol	92.041
ccc2	Mannitol	149.872
ccc2	Mannitol	257.45
ccc2	Mannitol	249.815
ccc2	Mannitol	121.51
ccc2	Mannitol	236.77
ccc2	Mannitol	65.338
ccc2	Mannitol	38.829
ccc2	Mannitol	126.876
ccc2	Mannitol	138.791
ccc2	Mannitol	128.717
ccc2	Mannitol	167.359
ccc2	Mannitol	108.24
ccc2	Mannitol	157.262
ccc2	Mannitol	228.608
ccc2	Mannitol	147.066
ccc2	Mannitol	244.932
ccc2	Mannitol	100.083
ccc2	Mannitol	148.966
ccc2	Mannitol	121.801
ccc2	Mannitol	53.685
ccc2	Mannitol	57.179
Wt	NaCl	35.204
Wt	NaCl	24.393
Wt	NaCl	139.178
Wt	NaCl	6.41
Wt	NaCl	18.356
Wt	NaCl	60.27
Wt	NaCl	106.418
Wt	NaCl	128.436
Wt	NaCl	32.434
Wt	NaCl	87.575
Wt	NaCl	69.751
Wt	NaCl	58.597
Wt	NaCl	12.884
Wt	NaCl	31.534
Wt	NaCl	72.897
Wt	NaCl	11.609
Wt	NaCl	58.723
Wt	NaCl	76.172
Wt	NaCl	131.559
Wt	NaCl	41.603
Wt	NaCl	96.085
Wt	NaCl	90.018
Wt	NaCl	112.134
Wt	NaCl	15.385
Wt	NaCl	46.225
Wt	NaCl	34.71
Wt	NaCl	72.354
Wt	NaCl	72.761
Wt	NaCl	61.659
Wt	NaCl	64.218
Wt	NaCl	20.87
Wt	NaCl	29.235
Wt	NaCl	39.599
Wt	NaCl	78.11
Wt	NaCl	69.751
Wt	NaCl	17.949
Wt	NaCl	22.132
Wt	NaCl	17.105
Wt	NaCl	49.885
Wt	NaCl	75.858
Wt	NaCl	108.46
Wt	NaCl	69.81
Wt	NaCl	100.008
Wt	NaCl	42.327
Wt	NaCl	51.681
Wt	NaCl	54.814
Wt	NaCl	24.494
Wt	NaCl	62.663
Wt	NaCl	87.302
Wt	NaCl	116.392
Wt	NaCl	97.208
Wt	NaCl	80.779
Wt	NaCl	201.494
Wt	NaCl	144.741
Wt	NaCl	45.327
Wt	NaCl	63.768
Wt	NaCl	124.141
Wt	NaCl	75.478
Wt	NaCl	38.053
Wt	NaCl	28.234
Wt	NaCl	24.325
Wt	NaCl	43.853
Wt	NaCl	56.932
Wt	NaCl	31.035
Wt	NaCl	40.885
Wt	NaCl	41.385
Wt	NaCl	26.399
Wt	NaCl	131.995
Wt	NaCl	112.973
Wt	NaCl	37.464
Wt	NaCl	38.506
Wt	NaCl	45.313
Wt	NaCl	46.627
Wt	NaCl	60.678
Wt	NaCl	32.97
Wt	NaCl	43.051
Wt	NaCl	63.298
Wt	NaCl	20.203
Wt	NaCl	47.6
Wt	NaCl	70.489
Wt	NaCl	23.887
Wt	NaCl	60.437
Wt	NaCl	72.154
Wt	NaCl	64.954
Wt	NaCl	48.381
Wt	NaCl	92.402
Wt	NaCl	18.815
Wt	NaCl	92.537
Wt	NaCl	79.487
Wt	NaCl	63.364
Wt	NaCl	37.961
Wt	NaCl	101.324
Wt	NaCl	104.958
Wt	NaCl	110.976
Wt	NaCl	38.99
Wt	NaCl	72.471
Wt	NaCl	35.112
Wt	NaCl	27.758
Wt	NaCl	58.011
Wt	NaCl	19.253
Wt	NaCl	23.887
Wt	NaCl	52.151
Wt	NaCl	24.575
Wt	NaCl	47.336
Wt	NaCl	40.663
Wt	NaCl	19.253
Wt	NaCl	16.454
ccc1	NaCl	184.21
ccc1	NaCl	105.159
ccc1	NaCl	141.171
ccc1	NaCl	157.296
ccc1	NaCl	92.539
ccc1	NaCl	103.973
ccc1	NaCl	220.293
ccc1	NaCl	60.311
ccc1	NaCl	232.811
ccc1	NaCl	41.741
ccc1	NaCl	67.475
ccc1	NaCl	173.551
ccc1	NaCl	218.043
ccc1	NaCl	130.995
ccc1	NaCl	196.66
ccc1	NaCl	67.182
ccc1	NaCl	57.407
ccc1	NaCl	169.308
ccc1	NaCl	78.467
ccc1	NaCl	108.974
ccc1	NaCl	125.876
ccc1	NaCl	131.758
ccc1	NaCl	214.413
ccc1	NaCl	50.377
ccc1	NaCl	157.671
ccc1	NaCl	42.385
ccc1	NaCl	186.388
ccc1	NaCl	162.901
ccc1	NaCl	235.887
ccc1	NaCl	117.677
ccc1	NaCl	141.061
ccc1	NaCl	26.399
ccc1	NaCl	57.849
ccc1	NaCl	47.505
ccc1	NaCl	54.874
ccc1	NaCl	66.184
ccc1	NaCl	16.667
ccc1	NaCl	75.739
ccc1	NaCl	83.422
ccc1	NaCl	57.621
ccc1	NaCl	189.813
ccc1	NaCl	236.999
ccc1	NaCl	283.345
ccc1	NaCl	93.335
ccc1	NaCl	123.41
ccc1	NaCl	100.008
ccc1	NaCl	125.386
ccc1	NaCl	89.505
ccc1	NaCl	214.44
ccc1	NaCl	89.008
ccc1	NaCl	51.919
ccc1	NaCl	92.885
ccc1	NaCl	149.385
ccc1	NaCl	99.15
ccc1	NaCl	80.729
ccc1	NaCl	138.681
ccc1	NaCl	127.537
ccc1	NaCl	94.603
ccc1	NaCl	67.219
ccc1	NaCl	59.86
ccc1	NaCl	73.088
ccc1	NaCl	65.923
ccc1	NaCl	111.332
ccc1	NaCl	111.95
ccc1	NaCl	94.071
ccc1	NaCl	82.421
ccc1	NaCl	140.681
ccc1	NaCl	172.863
ccc1	NaCl	80.861
ccc1	NaCl	75.945
ccc1	NaCl	134.42
ccc1	NaCl	202.211
ccc1	NaCl	125.569
ccc1	NaCl	225.597
ccc1	NaCl	139.844
ccc1	NaCl	161.406
ccc1	NaCl	57.849
ccc1	NaCl	175.585
ccc1	NaCl	151.369
ccc1	NaCl	203.249
ccc1	NaCl	165.901
ccc1	NaCl	194.103
ccc1	NaCl	96.162
ccc1	NaCl	134.224
ccc1	NaCl	92.138
ccc1	NaCl	59.474
ccc1	NaCl	162.431
ccc1	NaCl	54.226
ccc1	NaCl	261.516
ccc1	NaCl	42.171
ccc1	NaCl	203.721
ccc1	NaCl	76.204
ccc1	NaCl	79.859
ccc1	NaCl	114.455
ccc1	NaCl	62.017
ccc1	NaCl	90.036
ccc1	NaCl	53.571
ccc1	NaCl	84.001
ccc1	NaCl	78.331
ccc1	NaCl	124.366
ccc1	NaCl	156.479
ccc1	NaCl	110.443
ccc1	NaCl	126.865
ccc1	NaCl	129.798
ccc1	NaCl	85.964
ccc1	NaCl	57.977
ccc1	NaCl	74.953
ccc1	NaCl	77.307
ccc1	NaCl	148.723
ccc1	NaCl	208.47
ccc1	NaCl	204.603
ccc1	NaCl	202.973
ccc1	NaCl	92.388
ccc1	NaCl	124.702
ccc1	NaCl	135.352
ccc1	NaCl	83.658
ccc1	NaCl	158.275
ccc1	NaCl	41.345
ccc1	NaCl	106.719
ccc1	NaCl	195.923
ccc1	NaCl	191.387
ccc1	NaCl	183.495
ccc1	NaCl	81.418
ccc1	NaCl	158.855
ccc1	NaCl	73.96
ccc1	NaCl	99.833
ccc1	NaCl	34.21
ccc1	NaCl	101.673
ccc1	NaCl	132.794
ccc1	NaCl	112.708
ccc1	NaCl	128.701
ccc1	NaCl	16.829
ccc1	NaCl	134.632
ccc1	NaCl	83.673
ccc1	NaCl	58.76
ccc1	NaCl	18.254
ccc1	NaCl	21.98
ccc1	NaCl	27.758
ccc1	NaCl	20.51
ccc1	NaCl	105.354
ccc1	NaCl	82.167
ccc1	NaCl	87.66
ccc1	NaCl	104.481
ccc1	NaCl	92.086
ccc1	NaCl	119.784
ccc1	NaCl	59.5
ccc1	NaCl	42.906
ccc1	NaCl	70.46
ccc1	NaCl	54.456
ccc1	NaCl	83.698
ccc1	NaCl	78.219
ccc1	NaCl	189.18
ccc1	NaCl	68.845
ccc1	NaCl	55.516
ccc1	NaCl	71.283
ccc1	NaCl	17.437
ccc1	NaCl	52.983
ccc1	NaCl	39.256
ccc1	NaCl	72.154
ccc1	NaCl	72.929
ccc1	NaCl	151.213
ccc1	NaCl	44.805
ccc1	NaCl	70.282
ccc1	NaCl	34.933
ccc1	NaCl	74.873
ccc1	NaCl	183.14
ccc1	NaCl	139.613
ccc1	NaCl	21.011
ccc1	NaCl	39.203
ccc1	NaCl	100.499
ccc1	NaCl	76.415
ccc1	NaCl	65.878
ccc1	NaCl	61.394
ccc1	NaCl	21.011
ccc1	NaCl	58.369
ccc1	NaCl	63.034
ccc1	NaCl	59.324
ccc1	NaCl	67.316
ccc1	NaCl	131.01
ccc1	NaCl	168.352
ccc1	NaCl	187.322
ccc1	NaCl	81.735
ccc1	NaCl	252.419
ccc1	NaCl	73.724
ccc1	NaCl	47.336
ccc1	NaCl	42.073
ccc1	NaCl	126.679
ccc1	NaCl	147.843
ccc1	NaCl	73.724
ccc1	NaCl	81.684
ccc1	NaCl	63.397
ccc1	NaCl	80.243
ccc1	NaCl	90.166
ccc1	NaCl	106.436
ccc1	NaCl	122.873
ccc1	NaCl	51.061
ccc1	NaCl	67.13
ccc1	NaCl	65.941
ccc2	NaCl	51.856
ccc2	NaCl	65.698
ccc2	NaCl	52.564
ccc2	NaCl	129.791
ccc2	NaCl	157.713
ccc2	NaCl	122.763
ccc2	NaCl	173.21
ccc2	NaCl	60.379
ccc2	NaCl	42.617
ccc2	NaCl	74.326
ccc2	NaCl	50.718
ccc2	NaCl	155.149
ccc2	NaCl	215.861
ccc2	NaCl	122.95
ccc2	NaCl	15.491
ccc2	NaCl	21.222
ccc2	NaCl	184.031
ccc2	NaCl	155.467
ccc2	NaCl	133.266
ccc2	NaCl	121.694
ccc2	NaCl	161.544
ccc2	NaCl	81.418
ccc2	NaCl	80.769
ccc2	NaCl	55.143
ccc2	NaCl	158.607
ccc2	NaCl	192.922
ccc2	NaCl	237.543
ccc2	NaCl	29.22
ccc2	NaCl	42.906
ccc2	NaCl	44.15
ccc2	NaCl	162.203
ccc2	NaCl	89.261
ccc2	NaCl	128.507
ccc2	NaCl	83.673
ccc2	NaCl	128.507
ccc2	NaCl	126.596
ccc2	NaCl	270.375
ccc2	NaCl	70.371
ccc2	NaCl	102.224
ccc2	NaCl	239.342
ccc2	NaCl	28.571
ccc2	NaCl	318.812
ccc2	NaCl	187.6
ccc2	NaCl	98.722
ccc2	NaCl	88.417
ccc2	NaCl	88.417
ccc2	NaCl	187.722
ccc2	NaCl	109.712
ccc2	NaCl	72.471
ccc2	NaCl	131.961
ccc2	NaCl	79.487
ccc2	NaCl	79.251
ccc2	NaCl	91.473
ccc2	NaCl	73.014
ccc2	NaCl	16.454
ccc2	NaCl	32.97
ccc2	NaCl	67.316
ccc2	NaCl	101.324
ccc2	NaCl	50.031
ccc2	NaCl	33.222
ccc2	NaCl	111.873
ccc2	NaCl	36.791
ccc2	NaCl	192.065
ccc2	NaCl	159.184
ccc2	NaCl	91.382
ccc2	NaCl	115.175
ccc2	NaCl	109.901
ccc2	NaCl	100.083
ccc2	NaCl	76.197
ccc2	NaCl	18.815
ccc2	NaCl	22.817
ccc2	NaCl	51.02
ccc2	NaCl	116.344
ccc2	NaCl	102.631
ccc2	NaCl	176.15
ccc2	NaCl	70.134
ccc2	NaCl	37.241
ccc2	NaCl	19.253
ccc2	NaCl	30.132
ccc2	NaCl	66.444
ccc2	NaCl	104.541
ccc2	NaCl	51.629
ccc2	NaCl	55.516
ccc2	NaCl	44.055
ccc2	NaCl	103.137
ccc2	NaCl	81.479
ccc2	NaCl	26.609
