# Supplementary material for: Plant Trans-Golgi Network/Early Endosome pH regulation requires Cation Chloride Cotransporter (CCC1)
Source: eLife. 2022 Jan 6;11:e70701. doi: 10.7554/eLife.70701 (PMC8791640; doi:10.7554/eLife.70701)
Supplement: Figure 3—source data 1. [file elife-70701-fig3-data1.xlsx]

## Sheet: Fig3A
Image	Total coloc objects	% GFP coloc with RFP	% RFP coloc with GFP	% Total coloc		Peasons Coefficient
1	158	0.6183	0.7333	0.6695		0.843
2	87	0.5357	0.6364	0.58		0.872
3	306	0.683	0.7116	0.697		0.882
4	503	0.6605	0.5381	0.5925		0.905
5	337	0.6204	0.5799	0.5996		0.879
6	253	0.535	0.6649	0.5911		0.909
7	547	0.5667	0.9003	0.6942		0.9
8	155	0.4731	0.7379	0.5741		0.793
9	451	0.4045	0.879	0.5473		0.804
10	696	0.6511	0.8301	0.7296		0.899
11	507	0.5059	0.6757	0.5768		0.86
12	487	0.4815	0.5701	0.5214		0.709
13	797	0.7239	0.7712	0.747		0.916
14	633	0.6324	0.8575	0.7268		0.879
15	350	0.6318	0.7955	0.7042		0.859

## Sheet: Fig3C
Line	Length
Wt	178.327
Wt	277.068
Wt	97.595
Wt	320.645
Wt	167.876
Wt	161.406
Wt	207.838
Wt	167.868
Wt	148.873
Wt	244.102
Wt	180.776
Wt	209.7
Wt	140.629
Wt	88.843
Wt	83.344
Wt	111.604
Wt	195.081
Wt	141.259
Wt	168.914
Wt	150.146
Wt	181.398
Wt	188.042
Wt	64.863
Wt	91.222
Wt	89.79
Wt	70.465
Wt	92.19
Wt	124.777
Wt	79.768
Wt	105.703
Wt	140.016
Wt	58.754
Wt	27.12
Wt	57.957
Wt	70.465
Wt	26.542
Wt	32.29
Wt	62.473
Wt	61.013
Wt	98.529
Wt	52.147
Wt	69.01
Wt	36.969
Wt	124.777
Wt	125.092
Wt	154.082
Wt	173.034
Wt	33.616
Wt	89.538
Wt	133.547
Wt	144.951
Wt	107.553
Wt	85.596
Wt	110.666
Wt	98.743
Wt	126.124
Wt	97.03
Wt	49.571
Wt	52.685
Wt	26.542
Wt	106.341
Wt	60.804
Wt	51.713
Wt	42.268
Wt	45.2
Wt	39.902
Wt	39.297
Wt	29.317
Wt	26.06
Wt	67.147
Wt	43.678
Wt	52.685
Wt	106.606
Wt	49.713
Wt	43.159
Wt	144.366
Wt	21.887
Wt	39.189
Wt	49.911
Wt	28.538
Wt	57.1
Wt	23.74
Wt	32.981
Wt	45.665
Wt	74.564
Wt	64.252
Wt	46.187
Wt	83.934
Wt	77.037
Wt	82.682
Wt	106.302
Wt	49.599
Wt	63.812
Wt	54.369
Wt	62.111
Wt	39.189
Wt	114.937
Wt	61.907
Wt	61.266
Wt	64.863
Wt	64.58
Wt	36.931
Wt	47.776
Wt	35.292
Wt	57.1
Wt	51.358
Wt	118.534
Wt	109.629
Wt	86.056
Wt	52.039
Wt	126.214
Wt	176.637
Wt	114.199
Wt	152.103
Wt	142.776
Wt	138.935
Wt	67.021
Wt	55.422
Wt	125.351
Wt	47.123
Wt	72.882
Wt	30.263
Wt	80.646
Wt	27.685
Wt	109.32
Wt	91.206
Wt	96.33
Wt	119.292
Wt	45.355
Wt	33.574
Wt	31.939
Wt	27.327
Wt	131.345
Wt	132.711
Wt	125.811
Wt	126.426
Wt	138.02
Wt	106.712
Wt	63.878
Wt	95.02
Wt	106.169
Wt	70.144
Wt	213.212
Wt	94.514
Wt	219.676
Wt	188.984
Wt	117.291
Wt	74.356
Wt	60.526
Wt	144.034
Wt	127.502
Wt	73.881
Wt	133.294
Wt	142.846
Wt	77.873
Wt	134.011
Wt	99.821
Wt	67.67
Wt	82.324
Wt	117.867
Wt	84.486
Wt	154.885
Wt	273.192
Wt	180.565
Wt	230.15
Wt	235.285
Wt	134.964
Wt	192.61
Wt	124.777
Wt	115.768
Wt	204.289
Wt	164.724
Wt	105.129
Wt	47.033
Wt	113.606
Wt	54.24
Wt	137.385
Wt	131.087
Wt	92.022
Wt	160.356
Wt	58.778
Wt	52.066
Wt	31.36
Wt	124.946
Wt	170.442
Wt	67.147
Wt	143.397
Wt	121.33
Wt	104.416
Wt	49.143
Wt	49.371
Wt	66.004
Wt	50.388
Wt	157.876
Wt	46.823
Wt	83.951
Wt	126.693
Wt	48.45
Wt	99.779
Wt	60.526
Wt	83.951
Wt	52.039
Wt	56.305
Wt	70.284
Wt	81.013
Wt	129.878
Wt	156.801
Wt	132.233
Wt	149.327
Wt	74.337
Wt	132.019
Wt	13.429
Wt	91.638
Wt	97.595
Wt	96.87
Wt	70.843
Wt	35.61
Wt	30.263
Wt	29.317
Wt	54.136
Wt	49.371
Wt	45.2
Wt	48.941
Wt	37.536
Wt	40.602
Wt	52.282
Wt	121.481
Wt	87.065
Wt	47.272
Wt	35.571
Wt	31.939
Wt	165.16
Wt	226.049
Wt	196.348
Wt	227.614
Wt	177.059
Wt	271.199
Wt	257.106
Wt	253.569
Wt	242.713
Wt	142.776
Wt	208.007
Wt	149.741
Wt	175.259
Wt	242.713
Wt	331.223
Wt	397.652
Wt	330.021
Wt	324.94
Wt	333.5
Wt	279.861
Wt	248.818
Wt	98.743
Wt	73.938
Wt	85.101
Wt	75.838
Wt	116.217
Wt	110.155
Wt	97.32
Wt	123.825
Wt	64.58
Wt	143.24
Wt	129.127
Wt	63.878
Wt	16.787
Wt	30.633
Wt	147.666
Wt	72.475
Wt	36.969
Wt	185.94
Wt	259.87
Wt	95.699
Wt	78.108
Wt	156.216
Wt	75.745
Wt	95.685
Wt	129.791
Wt	102.743
Wt	120.14
Wt	191.553
Wt	154.52
Wt	202
Wt	166.223
Wt	151.128
Wt	195.03
Wt	114.162
Wt	249.378
Wt	178.233
Wt	230.933
Wt	290.547
Wt	202
Wt	157.16
Wt	323.271
Wt	275.677
Wt	331.687
Wt	326.286
Wt	404.325
Wt	321.488
Wt	226.348
Wt	160.961
Wt	172.912
Wt	253.258
Wt	314.2
Wt	263.558
Wt	428.093
Wt	406.254
Wt	365.771
Wt	349.105
Wt	326.48
Wt	310.882
Wt	266.994
Wt	270.288
Wt	212.934
Wt	173.692
Wt	204.53
Wt	226.963
Wt	206.757
Wt	177.536
Wt	207.077
Wt	77.674
Wt	148.333
Wt	52.066
Wt	185.94
Wt	100.735
Wt	170.871
Wt	179.179
Wt	162.633
Wt	169.555
Wt	47.003
Wt	139.694
Wt	278.661
Wt	181.678
Wt	205.355
Wt	199.254
Wt	434.625
Wt	485.556
Wt	348.377
Wt	340.445
Wt	270.476
Wt	370.543
Wt	310.501
Wt	485.924
Wt	446.73
Wt	418.533
Wt	344.362
Wt	334.769
Wt	394.493
Wt	382.713
Wt	476.606
Wt	435.723
Wt	493.968
Wt	457.344
Wt	452.263
Wt	478.235
Wt	345.665
Wt	302.689
Wt	381.636
Wt	383.86
Wt	263.253
Wt	275.554
Wt	334.158
Wt	389.178
Wt	337.548
Wt	413.228
Wt	356.228
Wt	388.849
Wt	405.921
Wt	341.098
Wt	308.521
Wt	291.085
Wt	299.624
Wt	389.366
Wt	214.484
Wt	239.086
Wt	342.516
Wt	240.004
Wt	357.952
Wt	334.242
Wt	431.587
Wt	316.706
Wt	479.177
Wt	224.648
Wt	252.255
Wt	361.232
Wt	105.45
Wt	121.168
Wt	76.449
Wt	68.826
Wt	105.37
Wt	62.292
Wt	79.023
Wt	194.857
Wt	82.58
Wt	43.581
Wt	50.36
Wt	125.441
Wt	78.108
Wt	59.988
Wt	59.041
Wt	94.604
Wt	72.67
Wt	47.272
Wt	121.051
Wt	75.838
Wt	45.2
Wt	45.2
Wt	63.012
Wt	383.746
Wt	330.405
Wt	240.965
Wt	269.578
Wt	279.009
Wt	179.524
Wt	383.276
Wt	417.731
Wt	329.509
Wt	349.975
Wt	462.932
Wt	393.148
Wt	357.921
Wt	201.504
Wt	414.637
Wt	379.385
Wt	343.042
Wt	374.36
Wt	319.941
Wt	232.265
Wt	264.279
Wt	328.584
Wt	372.504
Wt	356.548
Wt	333.922
Wt	378.359
Wt	315.663
Wt	409.05
Wt	181.305
Wt	251.891
Wt	254.728
Wt	247.336
Wt	286.656
Wt	328.905
Wt	220.904
Wt	310.015
Wt	241.945
Wt	134.964
Wt	175.741
Wt	141.259
Wt	96.14
Wt	99.737
Wt	80.454
Wt	216.087
Wt	232.52
Wt	217.335
Wt	271.64
Wt	229.341
Wt	172.275
Wt	150.764
Wt	203.584
Wt	182.729
Wt	218.834
Wt	166.248
Wt	57.174
Wt	65.812
Wt	154.666
Wt	478.423
Wt	487.051
Wt	460.154
Wt	527.372
Wt	409.824
Wt	437.62
Wt	425.902
Wt	361.478
Wt	297.259
Wt	431.42
Wt	392.843
Wt	396.182
Wt	323.619
Wt	273.954
Wt	299.276
Wt	316.269
Wt	257.145
Wt	381.341
Wt	320.421
Wt	296.917
Wt	210.799
Wt	172.708
Wt	185.173
Wt	368.163
Wt	280.666
Wt	195.766
Wt	311.715
Wt	250.641
Wt	406.954
Wt	331.074
Wt	477.27
Wt	185.02
Wt	201.951
Wt	147.59
Wt	68.353
Wt	60.432
Wt	87.581
Wt	94.066
Wt	112.559
Wt	181.188
Wt	155.021
Wt	70.684
Wt	53.349
Wt	38.937
Wt	22.832
Wt	35.292
Wt	117.615
Wt	185.142
Wt	35.61
Wt	200.797
Wt	203.231
Wt	190.291
Wt	219.317
Wt	178.446
Wt	175.388
Wt	130.937
Wt	86.056
Wt	64.58
Wt	48.797
Wt	60.804
Wt	38.646
Wt	145.513
Wt	47.003
Wt	89.538
Wt	189.958
Wt	54.136
Wt	81.013
Wt	146.084
Wt	199.261
Wt	128.394
Wt	209.196
Wt	144.142
Wt	304.54
Wt	256.355
Wt	113.27
Wt	359.292
Wt	269.139
Wt	83.479
Wt	311.063
Wt	259.827
Wt	196.283
Wt	129.878
Wt	221.541
Wt	193.165
Wt	246.377
Wt	348.523
Wt	231.451
Wt	248.223
Wt	213.357
Wt	266.424
Wt	290.649
Wt	315.886
Wt	307.18
Wt	132.743
Wt	127.844
Wt	204.806
Wt	129.596
Wt	220.547
Wt	211.287
Wt	227.174
Wt	216.758
Wt	260.168
Wt	342.812
Wt	298.352
Wt	294.707
Wt	246.817
Wt	372.504
Wt	298.456
Wt	399.881
Wt	344.62
Wt	283.632
Wt	160.952
Wt	285.38
Wt	320.983
Wt	253.569
Wt	260.195
Wt	344.145
Wt	253.753
Wt	336.21
Wt	132.817
Wt	146.546
Wt	190.543
Wt	206.156
Wt	89.585
Wt	180.776
Wt	101.223
Wt	166.874
Wt	168.605
Wt	248.11
Wt	154.739
Wt	91.607
Wt	102.11
Wt	94.544
Wt	117.519
Wt	110.844
Wt	164.647
Wt	345.661
Wt	244.292
Wt	199.939
Wt	173.197
Wt	206.696
Wt	183.276
Wt	218.39
Wt	243.24
Wt	102.564
Wt	155.783
Wt	57.371
Wt	292.789
Wt	72.882
Wt	96.403
Wt	75.41
Wt	240.684
Wt	213.852
Wt	319.024
Wt	274.586
Wt	389.685
Wt	113.27
Wt	159.536
Wt	156.198
Wt	200.129
Wt	178.327
Wt	224.328
Wt	126.303
Wt	188.199
Wt	220.694
Wt	183.721
Wt	283.776
Wt	221.897
Wt	256.86
Wt	229.74
Wt	64.34
Wt	178.011
Wt	216.133
Wt	164.647
Wt	218.834
Wt	229.611
Wt	60.642
Wt	189.958
Wt	254.03
Wt	324.207
Wt	114.261
Wt	117.375
Wt	119.08
Wt	168.17
Wt	57.1
Wt	191.141
Wt	99.17
Wt	177.948
Wt	92.465
Wt	224.598
Wt	251.964
Wt	268.274
Wt	236.36
Wt	143.24
Wt	184.723
Wt	118.475
Wt	137.652
Wt	260.85
Wt	170.739
Wt	315.609
Wt	191.369
Wt	297.619
Wt	171.529
Wt	96.33
Wt	69.214
Wt	73.881
Wt	149.402
Wt	244.817
Wt	68.497
Wt	189.185
Wt	62.676
Wt	230.713
Wt	207.24
Wt	415.068
Wt	248.223
Wt	211.407
Wt	246.057
Wt	239.669
Wt	335.269
Wt	296.751
Wt	464.105
Wt	263.985
Wt	245.139
Wt	373.863
Wt	377.195
Wt	231.244
Wt	286.853
Wt	64.58
Wt	268.777
Wt	232.617
Wt	116.605
Wt	157.876
Wt	167.035
Wt	129.269
Wt	240.497
Wt	154.448
Wt	366.817
Wt	158.117
Wt	139.976
Wt	373.633
Wt	422.003
Wt	278.484
Wt	250.703
Wt	125.946
Wt	305.247
Wt	373.818
Wt	380.738
Wt	119.835
Wt	229.801
Wt	415.614
Wt	312.69
Wt	304.216
Wt	148.873
Wt	399.317
Wt	229.046
Wt	236.557
Wt	103.766
Wt	306.96
Wt	160.188
Wt	109.976
Wt	63.812
Wt	48.941
Wt	126.258
Wt	260.173
Wt	281.027
Wt	46.763
Wt	44.063
Wt	77.62
Wt	340.109
Wt	72.824
Wt	357.858
Wt	104.051
Wt	227.236
Wt	340.59
Wt	40.567
Wt	32.981
Wt	41.29
Wt	196.291
Wt	117.039
Wt	350.687
Wt	199.106
Wt	149.402
Wt	89.743
Wt	84.686
Wt	67.189
Wt	270.601
Wt	149.015
Wt	99.099
Wt	234.324
Wt	201.448
Wt	241.549
Wt	275.815
Wt	325.027
Wt	92.343
Wt	91.206
Wt	188.506
Wt	471.721
Wt	465.366
Wt	409.381
Wt	263.814
Wt	339.28
Wt	122.727
Wt	317.927
Wt	204.365
Wt	342.467
Wt	144.376
Wt	159.076
Wt	230.132
Wt	206.539
Wt	81.134
Wt	101
Wt	146.199
Wt	292.577
Wt	314.935
Wt	123.38
Wt	353.672
Wt	374.01
Wt	397.067
Wt	423.327
Wt	404.648
Wt	313.805
Wt	121.168
Wt	150.82
Wt	241.456
Wt	141.169
Wt	216.68
Wt	370.604
Wt	211.04
Wt	107.763
Wt	120.876
Wt	173.879
Wt	224.874
Wt	207.301
Wt	204.199
Wt	123.927
Wt	241.088
Wt	377.079
Wt	213.667
Wt	394.664
Wt	205.958
Wt	384.153
Wt	132.616
Wt	199.826
Wt	385.515
Wt	77.511
Wt	163.867
Wt	168.546
Wt	160.987
Wt	248.818
Wt	107.488
Wt	205.239
Wt	184.204
Wt	507.353
Wt	291.109
Wt	350.148
Wt	467.918
Wt	476.916
Wt	344.33
Wt	386.03
Wt	378.373
Wt	345.93
Wt	371.295
Wt	336.896
Wt	219.471
Wt	66.895
Wt	87.581
Wt	224.924
Wt	230.034
Wt	82.272
Wt	193.798
Wt	260.585
Wt	174.655
Wt	379.143
Wt	190.986
Wt	255.358
Wt	134.399
Wt	92.86
Wt	243.408
Wt	172.52
Wt	220.681
Wt	60.642
Wt	134.389
Wt	350.88
Wt	164.588
Wt	95.271
Wt	366.629
Wt	420.438
Wt	395.474
Wt	432.712
Wt	387.662
Wt	419.203
Wt	223.573
Wt	160.188
Wt	315.752
Wt	313.607
Wt	298.338
Wt	298.153
Wt	138.722
Wt	152.252
Wt	338.498
Wt	468.76
Wt	104.362
Wt	409.766
Wt	52.039
Wt	384.754
Wt	311.059
Wt	73.747
Wt	247.376
Wt	197.057
Wt	298.974
Wt	213.351
Wt	311.443
Wt	70.584
Wt	49.4
Wt	292.789
Wt	201.951
Wt	169.372
Wt	209.371
Wt	250.905
Wt	243.518
Wt	49.713
Wt	228.51
Wt	212.344
Wt	249.892
Wt	327.618
Wt	244.54
Wt	415.397
Wt	316.821
Wt	273.011
Wt	301.05
Wt	342.59
Wt	361.614
Wt	358.33
Wt	356.892
Wt	416.316
Wt	242.067
Wt	409.611
Wt	291.651
Wt	318.303
Wt	154.766
Wt	257.583
Wt	109.436
Wt	144.347
Wt	217.426
Wt	18.768
Wt	249.378
Wt	310.574
Wt	392.398
Wt	500.193
Wt	407.85
Wt	442.041
Wt	228.016
Wt	238.851
Wt	468.002
Wt	286.661
Wt	316.465
Wt	166.689
Wt	73.633
Wt	67.67
Wt	140.217
Wt	100.398
Wt	158.704
Wt	97.768
Wt	174.978
Wt	268.893
Wt	248.444
Wt	363.743
Wt	298.073
Wt	384.56
Wt	204.123
Wt	314.612
Wt	191.141
Wt	160.039
Wt	176.461
Wt	384.538
Wt	371.079
Wt	172.904
Wt	434.35
Wt	212.934
Wt	268.384
Wt	336.172
Wt	225.5
Wt	87.436
Wt	174.591
Wt	224.83
Wt	157.367
Wt	300.009
Wt	163.695
Wt	289.21
Wt	181.398
Wt	164.724
Wt	188.027
Wt	269.474
Wt	334.264
Wt	342.948
Wt	272.132
Wt	216.868
Wt	356.592
Wt	237.175
Wt	245.093
Wt	161.86
Wt	222.714
Wt	302.558
Wt	286.779
Wt	320.838
Wt	248.382
Wt	294.018
Wt	146.286
Wt	151.09
Wt	235.668
Wt	140.338
Wt	264.279
Wt	156.153
Wt	196.57
Wt	246.36
Wt	190.587
Wt	238.939
Wt	268.762
Wt	191.671
Wt	268.683
Wt	404.648
Wt	406.504
Wt	37.724
Wt	305.547
Wt	279.861
Wt	368.461
Wt	387.193
Wt	280.415
Wt	334.264
Wt	164.073
Wt	242.626
Wt	411.413
Wt	303.103
Wt	352.778
Wt	296.081
Wt	193.922
Wt	223.775
Wt	136.635
Wt	107.488
Wt	200.164
Wt	212.716
Wt	305.178
Wt	348.559
Wt	87.87
Wt	210.257
Wt	201.196
Wt	43.935
Wt	209.189
Wt	267.411
Wt	199.092
Wt	235.015
Wt	81.273
Wt	177.631
Wt	223.068
Wt	283.359
Wt	224.924
Wt	351.63
Wt	300.877
Wt	79.023
Wt	173.107
Wt	237.698
Wt	161.45
Wt	411.482
Wt	260.752
Wt	324.05
Wt	239.557
Wt	390.162
Wt	339.782
Wt	411.444
Wt	244.102
Wt	395.559
Wt	500.316
Wt	414.365
Wt	237.644
Wt	165.952
Wt	122.819
Wt	287.564
Wt	299.262
Wt	181.056
Wt	218.209
Wt	163.531
Wt	126.693
Wt	174.784
Wt	273.3
Wt	86.023
Wt	138.152
Wt	96.199
Wt	120.608
Wt	129.52
Wt	189.572
Wt	204.51
Wt	252.299
Wt	178.99
Wt	183.161
Wt	100.86
Wt	164.039
Wt	117.519
Wt	154.557
Wt	234.517
Wt	195.6
Wt	52.147
Wt	206.914
Wt	185.94
Wt	184.081
Wt	192.785
Wt	298.191
Wt	205.239
Wt	198.148
Wt	363.995
Wt	287.132
Wt	197.806
Wt	219.599
Wt	133.674
Wt	42.798
Wt	57.469
Wt	33.741
Wt	109.976
Wt	121.284
Wt	155.139
Wt	189.475
Wt	219.291
Wt	179.626
Wt	245.277
Wt	175.179
Wt	145.852
Wt	123.38
Wt	191.965
Wt	169.555
Wt	191.965
Wt	170.739
Wt	137.457
Wt	172.912
Wt	233.939
Wt	282.995
Wt	86.023
Wt	147.007
Wt	108.337
Wt	79.112
Wt	98.07
Wt	65.554
Wt	46.187
Wt	86.935
Wt	89.538
Wt	167.843
Wt	88.222
Wt	202.035
Wt	69.559
Wt	96.403
Wt	88.637
Wt	245.139
Wt	198.063
Wt	170.243
Wt	172.259
Wt	214.431
Wt	186.364
Wt	197.657
Wt	189.304
Wt	238.78
Wt	280.575
Wt	255.694
Wt	231.791
Wt	284.297
Wt	160.54
Wt	191.399
Wt	136.48
Wt	149.854
Wt	256.931
Wt	201.441
Wt	62.676
Wt	146.006
Wt	230.077
Wt	224.372
Wt	211.547
Wt	182.073
Wt	306.077
Wt	239.086
Wt	269.474
Wt	302.558
Wt	185.72
Wt	168.153
Wt	276.956
Wt	363.099
Wt	269.228
Wt	332.234
Wt	243.038
Wt	263.376
Wt	247.541
Wt	100.735
Wt	137.498
Wt	202
Wt	213.99
Wt	191.642
Wt	178.327
Wt	152.353
Wt	131.087
Wt	203.148
Wt	178.138
Wt	156.261
Wt	325.772
Wt	144.892
Wt	179.626
Wt	286.971
Wt	276.61
Wt	162.268
Wt	416.88
Wt	305.856
Wt	382.079
Wt	385.574
Wt	311.642
Wt	393.545
Wt	381.991
Wt	199.084
Wt	207.267
Wt	315.672
Wt	312.69
Wt	276.717
Wt	348.729
Wt	305.801
Wt	319.108
Wt	221.439
Wt	321.242
Wt	230.859
Wt	152.103
Wt	272.132
Wt	277.165
Wt	239.822
Wt	261.384
Wt	194.792
Wt	198.539
Wt	189.921
Wt	385.033
Wt	268.809
Wt	219.862
Wt	253.619
Wt	387.226
Wt	324.901
Wt	343.408
Wt	251.852
Wt	278.58
Wt	289.785
Wt	172.251
Wt	318.139
Wt	209.835
Wt	177.305
Wt	235.309
Wt	192.434
Wt	190.054
Wt	197.15
Wt	323.954
Wt	83.479
Wt	318.139
Wt	235.506
Wt	294.745
Wt	225.231
Wt	284.668
Wt	231.268
Wt	169.347
Wt	258.609
Wt	229.985
Wt	182.976
Wt	357.243
Wt	330.87
Wt	321.483
Wt	249.582
Wt	360.005
Wt	209.189
Wt	231.743
Wt	354.646
Wt	354.356
Wt	373.003
Wt	70.824
Wt	337.644
Wt	76.449
Wt	216.608
Wt	266.27
Wt	256.64
Wt	293.149
Wt	353.93
Wt	357.069
Wt	332.721
Wt	302.689
Wt	281.748
Wt	53.349
Wt	239.304
Wt	357.964
Wt	427.559
Wt	308.681
Wt	208.115
Wt	338.744
Wt	298.64
Wt	458.488
Wt	367.339
Wt	320.522
Wt	391.906
Wt	367.906
Wt	220.904
Wt	363.743
Wt	219.964
Wt	414.756
Wt	183.353
Wt	309.92
Wt	238.78
Wt	268.384
Wt	221.242
Wt	231.298
Wt	171.759
Wt	200.839
Wt	267.421
Wt	300.46
Wt	362.486
Wt	229.611
Wt	365.154
Wt	209.519
Wt	180.776
Wt	251.891
Wt	267.142
Wt	326.998
Wt	69.214
Wt	73.938
Wt	385.855
Wt	107.985
Wt	409.422
Wt	456.221
Wt	396.698
Wt	268.615
Wt	370.543
Wt	383.871
Wt	311.294
Wt	300.563
Wt	388.649
Wt	279.07
Wt	213.516
Wt	349.955
Wt	227.954
Wt	263.103
Wt	260.541
Wt	299.657
Wt	376.331
Wt	387.527
Wt	392.312
Wt	367.922
Wt	458.586
Wt	252.193
Wt	529.915
Wt	289.639
Wt	343.764
Wt	174.816
Wt	423.23
Wt	47.272
Wt	44.063
Wt	125.845
Wt	80.454
Wt	200.164
Wt	208.487
Wt	219.317
Wt	141.587
Wt	160.329
Wt	110.958
Wt	146.199
Wt	138.122
Wt	118.807
Wt	170.466
Wt	95.802
Wt	131.249
Wt	72.728
Wt	43.935
Wt	53.953
Wt	61.013
Wt	176.269
Wt	154.073
Wt	94.782
Wt	133.895
Wt	127.977
Wt	99.042
Wt	103.181
Wt	87.097
Wt	144.366
Wt	233.022
Wt	219.952
Wt	178.895
Wt	156.909
Wt	48.797
Wt	141.029
Wt	98.285
Wt	124.188
Wt	38.61
Wt	53.005
Wt	99.099
Wt	100.075
Wt	101.07
Wt	148.2
Wt	122.819
Wt	159.298
Wt	107.763
Wt	125.587
Wt	133.029
Wt	130.041
Wt	108.337
Wt	79.768
Wt	95.212
Wt	143.721
Wt	177.536
Wt	169.546
Wt	128.734
Wt	32.594
Wt	99.099
Wt	213.984
Wt	121.284
Wt	36.931
Wt	127.855
Wt	114.753
Wt	118.522
Wt	124.63
Wt	108.92
Wt	36.16
Wt	36.043
Wt	35.292
Wt	33.783
Wt	30.263
Wt	48.682
Wt	89.223
Wt	50.612
Wt	112.057
Wt	124.777
Wt	133.979
Wt	97.363
Wt	134.399
Wt	209.68
Wt	213.43
Wt	347.324
Wt	230.15
Wt	144.571
Wt	148.712
Wt	38.28
Wt	18.465
Wt	86.659
Wt	20.422
Wt	52.12
Wt	61.907
Wt	87.694
Wt	60.269
Wt	60.175
Wt	119.552
Wt	92.586
Wt	224.623
Wt	232.417
Wt	305.953
Wt	110.907
Wt	86.203
Wt	130.052
Wt	84.302
Wt	17.119
Wt	33.616
Wt	18.768
Wt	23.74
Wt	35.412
Wt	66.409
Wt	9.788
Wt	12.221
Wt	31.36
Wt	28.587
Wt	48.333
Wt	56.28
Wt	79.609
Wt	125.104
Wt	192.895
Wt	134.901
Wt	276.636
Wt	124.188
Wt	50.304
Wt	36.816
Wt	27.685
Wt	70.824
Wt	85.761
Wt	132.477
Wt	85.761
Wt	135.308
Wt	147.389
Wt	161.45
Wt	42.798
Wt	111.616
Wt	130.646
Wt	75.391
Wt	16.533
Wt	18.542
Wt	17.283
Wt	35.61
Wt	14.343
Wt	35.412
Wt	104.578
Wt	113.171
Wt	169.28
Wt	129.476
Wt	177.972
Wt	242.875
Wt	206.532
Wt	202.981
Wt	61.724
Wt	51.849
Wt	67.67
Wt	48.884
Wt	39.902
Wt	28.734
Wt	24.785
Wt	46.672
Wt	52.712
Wt	251.746
Wt	67.981
Wt	120.596
Wt	114.937
Wt	138.152
Wt	40.323
Wt	67.231
Wt	43.646
Wt	33.741
Wt	16.871
Wt	61.907
Wt	20.422
Wt	41.967
Wt	61.907
Wt	70.604
Wt	135.9
Wt	20.422
Wt	64.252
Wt	112.321
Wt	284.252
Wt	251.88
Wt	215.401
Wt	172.022
Wt	199.092
Wt	152.122
Wt	80.244
Wt	13.534
Wt	53.349
Wt	52.712
Wt	58.2
Wt	46.187
Wt	62.721
Wt	99.397
Wt	196.864
Wt	52.47
Wt	233.481
Wt	217.646
Wt	205.239
Wt	99.425
Wt	300.164
Wt	229.243
Wt	103.058
Wt	111.477
Wt	97.681
Wt	21.823
Wt	49.911
Wt	20.214
Wt	32.981
Wt	10.072
Wt	31.939
Wt	88.843
Wt	8.56
Wt	101.972
Wt	103.071
Wt	91.638
Wt	73.881
Wt	23.501
Wt	116.266
Wt	223.119
Wt	225.625
Wt	93.961
Wt	81.981
Wt	49.143
Wt	104.092
Wt	62.111
Wt	25.18
Wt	17.526
Wt	15.477
Wt	62.676
Wt	76.89
Wt	130.084
Wt	104.739
Wt	131.923
Wt	154.557
Wt	131.667
Wt	140.699
Wt	167.094
Wt	121.817
Wt	110.666
Wt	74.318
Wt	70.584
Wt	47.003
Wt	37.273
Wt	101.612
Wt	109.127
Wt	87.694
Wt	148.2
Wt	75.073
Wt	110.436
Wt	57.001
Wt	35.61
Wt	45.665
Wt	130.344
Wt	40.428
Wt	119.233
Wt	49.371
Wt	118.082
Wt	129.095
Wt	120.911
Wt	188.042
Wt	259.191
Wt	316.95
Wt	53.718
Wt	48.941
Wt	44.35
Wt	78.594
Wt	50.36
Wt	184.265
Wt	95.493
Wt	110.844
Wt	206.777
Wt	215.107
Wt	99.737
Wt	105.062
Wt	138.844
Wt	101
Wt	127.502
Wt	116.46
Wt	87.581
Wt	103.644
Wt	61.907
Wt	91.407
Wt	109.436
Wt	44.318
Wt	53.005
Wt	37.724
Wt	16.871
Wt	50.08
Wt	64.863
Wt	31.895
Wt	60.642
Wt	138.377
Wt	116.458
Wt	34.635
Wt	10.219
Wt	37.567
Wt	16.8
Wt	42.135
Wt	90.863
Wt	61.062
Wt	104.38
Wt	120.238
Wt	138.142
Wt	95.998
Wt	147.615
Wt	349.583
Wt	232.709
Wt	149.335
Wt	155.883
Wt	43.063
Wt	25.201
Wt	80.922
Wt	26.081
Wt	52.163
Wt	67.537
Wt	84.421
Wt	58.004
Wt	69.127
Wt	113.363
Wt	84.555
Wt	211.159
Wt	302.278
Wt	112.653
Wt	84.852
Wt	142.121
Wt	93.657
Wt	17.759
Wt	24.596
Wt	14.56
Wt	30.209
Wt	31.219
Wt	41.338
Wt	27.381
Wt	69.659
Wt	57.39
Wt	79.178
Wt	122.081
Wt	188.641
Wt	131.028
Wt	37.754
Wt	32.447
Wt	74.606
Wt	87.379
Wt	5.313
Wt	11.76
Wt	119.614
Wt	76.788
Wt	60.225
Wt	140.05
Wt	153.244
Wt	167.542
Wt	50.121
Wt	119.319
Wt	218.548
Wt	130.871
Wt	66.886
Wt	21.251
Wt	21.251
Wt	19.664
Wt	34.635
Wt	33.977
Wt	26.933
Wt	41.187
Wt	101.083
Wt	108.944
Wt	106.799
Wt	173.46
Wt	141.164
Wt	168.038
Wt	210.998
Wt	213.604
Wt	62.434
Wt	46.801
Wt	64.04
Wt	52.755
Wt	42.833
Wt	30.288
Wt	21.905
Wt	48.837
Wt	56.675
Wt	78.1
Wt	124.392
Wt	113.81
Wt	135.074
Wt	47.071
Wt	68.902
Wt	37.904
Wt	30.979
Wt	20.439
Wt	61.155
Wt	30.658
Wt	38.968
Wt	64.916
Wt	80.239
Wt	23.581
Wt	137.61
Wt	263.933
Wt	203.924
Wt	170.581
Wt	188.862
Wt	158.184
Wt	87.12
Wt	22.098
Wt	58.004
Wt	52.325
Wt	75.021
Wt	34.018
Wt	65.887
Wt	106.176
Wt	198.956
Wt	50.513
Wt	212.989
Wt	214.481
Wt	190.447
Wt	103.633
Wt	103.905
Wt	104.771
Wt	93.601
Wt	18.784
Wt	53.683
Wt	20.161
Wt	35.6
Wt	28.758
Wt	15.938
Wt	88.916
Wt	99.903
Wt	109.629
Wt	91.482
Wt	74.398
Wt	38.678
Wt	112.764
Wt	98.322
Wt	71.318
Wt	55.847
Wt	104.285
Wt	58.826
Wt	26.933
Wt	15.12
Wt	22.415
Wt	61.615
Wt	69.555
Wt	129.102
Wt	89.438
Wt	135.762
Wt	159.428
Wt	129.233
Wt	145.04
Wt	165.039
Wt	125.925
Wt	109.526
Wt	64.851
Wt	58.826
Wt	40.321
Wt	30.427
Wt	108.828
Wt	116.118
Wt	76.067
Wt	154.893
Wt	69.392
Wt	118.25
Wt	70.901
Wt	53.866
Wt	44.482
Wt	129.756
Wt	44.482
Wt	120.975
Wt	60.691
Wt	117.363
Wt	115.923
Wt	188.165
Wt	45.237
Wt	45.856
Wt	54.102
Wt	82.065
Wt	57.516
Wt	183.31
Wt	96.701
Wt	228.789
Wt	94.233
Wt	138.713
Wt	97.862
Wt	117.387
Wt	119.567
Wt	93.722
Wt	94.696
Wt	57.047
Wt	94.233
Wt	113.263
Wt	49.412
Wt	17.54
Wt	53.788
Wt	35.915
Wt	53.788
Wt	178.947
Wt	202.618
Wt	132.372
Wt	147.844
Wt	114.502
Wt	116.009
Wt	89.296
Wt	307.967
Wt	211.566
Wt	275.456
Wt	91.913
Wt	274.239
Wt	178.069
Wt	134.152
Wt	121.255
Wt	174.87
Wt	217.604
Wt	264.457
Wt	197.433
Wt	57.736
Wt	299.218
Wt	80.66
Wt	111.404
Wt	163.509
Wt	185.088
Wt	252.522
Wt	37.303
Wt	153.023
Wt	258.777
Wt	195.24
Wt	348.844
Wt	356.364
Wt	297.601
Wt	324.358
Wt	291.041
Wt	308.416
Wt	310.154
Wt	180.149
Wt	183.503
Wt	156.181
Wt	215.105
Wt	309.681
Wt	191.098
Wt	157.181
Wt	228.493
Wt	293.028
Wt	268.23
Wt	438.084
Wt	418.733
Wt	460.177
Wt	336.333
Wt	292.589
Wt	371.386
Wt	249.446
Wt	312.62
Wt	291.54
Wt	43.81
Wt	139.606
Wt	196.573
Wt	208.434
Wt	52.082
Wt	118.035
Wt	161.713
Wt	141.703
Wt	111.34
Wt	52.109
Wt	207.164
Wt	174.927
Wt	172.252
Wt	157.862
Wt	109.822
Wt	202.165
Wt	175.86
Wt	190.795
Wt	73.386
Wt	278.098
Wt	54.284
Wt	190.387
Wt	126.015
Wt	124.017
Wt	220.131
Wt	138.102
Wt	183.748
Wt	172.023
Wt	109.009
Wt	181.733
Wt	180.713
Wt	140.744
Wt	44.195
Wt	18.784
Wt	29.771
Wt	77.355
Wt	15.12
Wt	157.54
Wt	164.679
Wt	122.655
Wt	137.774
Wt	206.509
Wt	142.636
Wt	182.384
Wt	147.242
Wt	60.691
Wt	130.45
Wt	230.093
Wt	50.541
Wt	214.158
Wt	218.723
Wt	190.031
Wt	92.784
Wt	203.293
Wt	132.34
Wt	95.763
Wt	98.881
Wt	47.519
Wt	20.161
Wt	22.098
Wt	86.126
Wt	105.896
Wt	110.934
Wt	139.808
Wt	182.144
Wt	215.466
Wt	235.926
Wt	139.808
Wt	133.265
Wt	46.861
Wt	168.223
Wt	205.653
Wt	106.494
Wt	148.796
Wt	149.76
Wt	58.441
Wt	73.347
Wt	66.949
Wt	69.189
Wt	40.912
Wt	48.981
Wt	38.311
Wt	81.824
Wt	129.93
Wt	243.659
Wt	163.854
Wt	91.913
Wt	130.763
Wt	112.413
Wt	88.661
Wt	63.864
Wt	15.12
Wt	61.316
Wt	100.831
Wt	157.181
Wt	104.177
Wt	212.491
Wt	110.998
Wt	53.997
Wt	67.391
Wt	213.426
Wt	156.1
Wt	212.989
Wt	219.669
Wt	62.524
Wt	66.463
Wt	39.934
Wt	130.483
Wt	166.825
Wt	314.977
Wt	241.191
Wt	274.388
Wt	186.485
Wt	299.506
Wt	148.045
Wt	226.027
Wt	133.403
Wt	150.268
Wt	194.436
Wt	150.662
Wt	444.156
Wt	521.587
Wt	327.885
Wt	272.422
Wt	161.992
Wt	208.353
Wt	250.468
Wt	314.6
Wt	101.306
Wt	229.005
Wt	118.035
Wt	96.233
Wt	279.758
Wt	109.346
Wt	276.145
Wt	140.336
Wt	276.252
Wt	231.694
Wt	270.527
Wt	222.71
[truncated: 2,944 more rows]

## Sheet: Fig3Sup1C
Line	Treat	Length
Wt	Control	143.998
Wt	Control	122.497
Wt	Control	136.386
Wt	Control	117.821
Wt	Control	114.899
Wt	Control	118.828
Wt	Control	115.863
Wt	Control	210.249
Wt	Control	143.31
Wt	Control	165.878
Wt	Control	150.054
Wt	Control	137.959
Wt	Control	162.691
Wt	Control	159.692
Wt	Control	130.442
Wt	Control	185.147
Wt	Control	182.94
Wt	Control	195.04
Wt	Control	242.296
Wt	Control	272.03
Wt	Control	242.278
Wt	Control	259.308
Wt	Control	360.457
Wt	Control	163.946
Wt	Control	130.064
Wt	Control	144.523
Wt	Control	120.818
Wt	Control	112.239
Wt	Control	159.823
Wt	Control	216.769
Wt	Control	208.114
Wt	Control	112.624
Wt	Control	93.994
Wt	Control	104.033
Wt	Control	153.28
Wt	Control	87.459
Wt	Control	120.45
Wt	Control	173.155
Wt	Control	193.377
Wt	Control	323.004
Wt	Control	86.311
Wt	Control	96.062
Wt	Control	112.56
Wt	Control	68.788
Wt	Control	255.02
Wt	Control	111.564
Wt	Control	129.839
Wt	Control	143.665
Wt	Control	170.391
Wt	Control	140.661
Wt	Control	145.946
Wt	Control	153.739
Wt	Control	135.212
Wt	Control	123.755
Wt	Control	124.764
Wt	Control	193.7
Wt	Control	157.739
Wt	Control	186.63
Wt	Control	148.462
Wt	Control	190.673
Wt	Control	147.004
Wt	Control	131.146
Wt	Control	141.125
Wt	Control	96.013
Wt	Control	94.923
Wt	Control	138.21
Wt	Control	172.942
Wt	Control	84.14
Wt	Control	135.522
Wt	Control	126.373
Wt	Control	120.435
Wt	Control	121.394
Wt	Control	92.6
Wt	Control	122.47
Wt	Control	184.985
Wt	Control	180.649
Wt	Control	190.73
Wt	Control	164.698
Wt	Control	153.989
Wt	Control	170.151
Wt	Control	75.115
Wt	Control	76.081
Wt	Control	85.693
Wt	Control	157.519
Wt	Control	133.145
Wt	Control	155.845
Wt	Control	233.569
Wt	Control	180.829
Wt	GFPCCC	107.203
Wt	GFPCCC	91.006
Wt	GFPCCC	120.423
Wt	GFPCCC	194.378
Wt	GFPCCC	167.622
Wt	GFPCCC	66.805
Wt	GFPCCC	166.255
Wt	GFPCCC	150.476
Wt	GFPCCC	143.018
Wt	GFPCCC	186.756
Wt	GFPCCC	172.232
Wt	GFPCCC	159.599
Wt	GFPCCC	201.281
Wt	GFPCCC	208.982
Wt	GFPCCC	184.938
Wt	GFPCCC	213.493
Wt	GFPCCC	118.866
Wt	GFPCCC	86.176
Wt	GFPCCC	147.583
Wt	GFPCCC	141.836
Wt	GFPCCC	149.747
Wt	GFPCCC	158.28
Wt	GFPCCC	222.508
Wt	GFPCCC	197.927
Wt	GFPCCC	245.564
Wt	GFPCCC	158.184
Wt	GFPCCC	105.339
Wt	GFPCCC	69.204
Wt	GFPCCC	101.815
Wt	GFPCCC	106.278
Wt	GFPCCC	175.278
Wt	GFPCCC	160.362
Wt	GFPCCC	146.698
Wt	GFPCCC	137.96
Wt	GFPCCC	122.572
Wt	GFPCCC	128.863
Wt	GFPCCC	130.125
Wt	GFPCCC	136.583
Wt	GFPCCC	153.134
Wt	GFPCCC	143.045
Wt	GFPCCC	114.84
Wt	GFPCCC	132.349
Wt	GFPCCC	205.593
Wt	GFPCCC	175.184
Wt	GFPCCC	176.745
Wt	GFPCCC	161.524
Wt	GFPCCC	167.542
Wt	GFPCCC	140.432
Wt	GFPCCC	199.824
Wt	GFPCCC	245.869
Wt	GFPCCC	134.405
Wt	GFPCCC	260.744
Wt	GFPCCC	316.368
Wt	GFPCCC	201.009
Wt	GFPCCC	182.807
Wt	GFPCCC	176.855
Wt	GFPCCC	140.809
Wt	GFPCCC	130.514
Wt	GFPCCC	119.724
Wt	GFPCCC	125.675
Wt	GFPCCC	153.239
Wt	GFPCCC	171.517
Wt	GFPCCC	174.866
Wt	GFPCCC	149.894
Wt	GFPCCC	125.542
Wt	GFPCCC	156.291
Wt	GFPCCC	155.207
Wt	GFPCCC	230.321
Wt	GFPCCC	141.802
Wt	GFPCCC	155.721
Wt	GFPCCC	175.999
Wt	GFPCCC	129.223
Wt	GFPCCC	121.385
Wt	GFPCCC	122.225
Wt	GFPCCC	89.815
Wt	GFPCCC	144.704
Wt	GFPCCC	145.339
Wt	GFPCCC	108.473
Wt	GFPCCC	194.976
Wt	GFPCCC	231.232
Wt	GFPCCC	148.301
Wt	GFPCCC	125.653
Wt	GFPCCC	140.341
Wt	GFPCCC	133.99
Wt	GFPCCC	104.818
Wt	GFPCCC	118.849
Wt	GFPCCC	91.089
Wt	GFPCCC	156.671
Wt	GFPCCC	158.771
Wt	GFPCCC	171.208
Wt	GFPCCC	95.02
Wt	GFPCCC	83.79
Wt	GFPCCC	87.673
Wt	GFPCCC	121.031
Wt	GFPCCC	106.635
Wt	GFPCCC	154.889
Wt	GFPCCC	149.685
Wt	GFPCCC	189.517
Wt	GFPCCC	169.569
Wt	GFPCCC	160.268
Wt	GFPCCC	192.406
Wt	GFPCCC	195.451
Wt	GFPCCC	171.697
Wt	GFPCCC	180.15
Wt	GFPCCC	159.446
Wt	GFPCCC	122.35
Wt	GFPCCC	136.418
Wt	GFPCCC	180.707
Wt	GFPCCC	165.222
Wt	GFPCCC	206.179
Wt	GFPCCC	132.652
Wt	GFPCCC	126.907
Wt	GFPCCC	128.392
Wt	GFPCCC	143.113
Wt	GFPCCC	149.962
Wt	GFPCCC	186.365
Wt	GFPCCC	148.283
Wt	GFPCCC	192.639
Wt	GFPCCC	120.517
Wt	GFPCCC	117.719
Wt	GFPCCC	116.071
Wt	GFPCCC	166.619
Wt	GFPCCC	153.28
Wt	GFPCCC	195.35
Wt	GFPCCC	176.75
Wt	GFPCCC	163.288
Wt	GFPCCC	162.408
Wt	GFPCCC	182.79
Wt	GFPCCC	157.197
Wt	GFPCCC	118.215
ccc	Control	125.599
ccc	Control	119.059
ccc	Control	103.713
ccc	Control	108.813
ccc	Control	138.079
ccc	Control	110.592
ccc	Control	116.488
ccc	Control	95.269
ccc	Control	117.913
ccc	Control	111.7
ccc	Control	115.922
ccc	Control	120.711
ccc	Control	131.773
ccc	Control	135.165
ccc	Control	179.521
ccc	Control	207.492
ccc	Control	138.69
ccc	Control	184.059
ccc	Control	180.092
ccc	Control	117.213
ccc	Control	144.325
ccc	Control	126.227
ccc	Control	109.541
ccc	Control	103.294
ccc	Control	119.377
ccc	Control	155.917
ccc	Control	165.414
ccc	Control	155.917
ccc	Control	123.542
ccc	Control	135.549
ccc	Control	136.125
ccc	Control	132.957
ccc	Control	108.672
ccc	Control	132.273
ccc	Control	182.237
ccc	Control	184.666
ccc	Control	203.047
ccc	Control	126.989
ccc	Control	86.937
ccc	Control	139.717
ccc	Control	278.142
ccc	Control	204.722
ccc	Control	122.162
ccc	Control	100.858
ccc	Control	124.307
ccc	Control	136.871
ccc	Control	118.232
ccc	Control	194.117
ccc	Control	148.875
ccc	Control	216.429
ccc	Control	253.043
ccc	Control	146.142
ccc	Control	146.951
ccc	Control	161.639
ccc	Control	166.661
ccc	Control	83.676
ccc	Control	71.357
ccc	Control	86.6
ccc	Control	124.616
ccc	Control	122.119
ccc	Control	102.327
ccc	Control	125.653
ccc	Control	154.032
ccc	Control	151.76
ccc	Control	117.989
ccc	Control	103.302
ccc	Control	130.173
ccc	Control	123.372
ccc	Control	88.987
ccc	Control	86.278
ccc	Control	162.508
ccc	Control	218.025
ccc	Control	131.137
ccc	Control	120.35
ccc	Control	128.181
ccc	Control	108.364
ccc	Control	109.164
ccc	Control	182.743
ccc	Control	78.515
ccc	Control	103.293
ccc	Control	120.217
ccc	Control	119.77
ccc	Control	126.139
ccc	Control	119.24
ccc	Control	99.492
ccc	Control	44.466
ccc	Control	76.488
ccc	Control	37.62
ccc	Control	65.621
ccc	Control	96.751
ccc	Control	96.759
ccc	Control	93.115
ccc	Control	115.603
ccc	Control	114.067
ccc	Control	116.612
ccc	Control	84.408
ccc	Control	91.443
ccc	Control	68.174
ccc	Control	96.203
ccc	Control	157.569
ccc	Control	163.796
ccc	Control	202.82
ccc	Control	131.506
ccc	Control	139.273
ccc	Control	148.008
ccc	Control	143.098
ccc	Control	188.475
ccc	GFPCCC	107.777
ccc	GFPCCC	135.107
ccc	GFPCCC	116.477
ccc	GFPCCC	132.833
ccc	GFPCCC	95.126
ccc	GFPCCC	104.818
ccc	GFPCCC	78.017
ccc	GFPCCC	104.348
ccc	GFPCCC	103.302
ccc	GFPCCC	79.072
ccc	GFPCCC	89.361
ccc	GFPCCC	150.544
ccc	GFPCCC	166.468
ccc	GFPCCC	243.597
ccc	GFPCCC	250.081
ccc	GFPCCC	152.958
ccc	GFPCCC	138.946
ccc	GFPCCC	99.317
ccc	GFPCCC	110.949
ccc	GFPCCC	130.415
ccc	GFPCCC	276.446
ccc	GFPCCC	258.935
ccc	GFPCCC	310.082
ccc	GFPCCC	277.474
ccc	GFPCCC	171.825
ccc	GFPCCC	205.722
ccc	GFPCCC	121.332
ccc	GFPCCC	102.779
ccc	GFPCCC	139.266
ccc	GFPCCC	147.14
ccc	GFPCCC	131.499
ccc	GFPCCC	167.509
ccc	GFPCCC	169.152
ccc	GFPCCC	161.58
ccc	GFPCCC	126.624
ccc	GFPCCC	126.174
ccc	GFPCCC	103.273
ccc	GFPCCC	113.359
ccc	GFPCCC	136.52
ccc	GFPCCC	125.246
ccc	GFPCCC	106.95
ccc	GFPCCC	157.674
ccc	GFPCCC	242.37
ccc	GFPCCC	309.388
ccc	GFPCCC	243.518
ccc	GFPCCC	157.244
ccc	GFPCCC	136.159
ccc	GFPCCC	146.483
ccc	GFPCCC	107.707
ccc	GFPCCC	101.69
ccc	GFPCCC	169.444
ccc	GFPCCC	112.486
ccc	GFPCCC	108.141
ccc	GFPCCC	127.972
ccc	GFPCCC	253.479
ccc	GFPCCC	144.761
ccc	GFPCCC	184.685
ccc	GFPCCC	245.537
ccc	GFPCCC	139.884
ccc	GFPCCC	102.179
ccc	GFPCCC	142.736
ccc	GFPCCC	110.406
ccc	GFPCCC	205.858
ccc	GFPCCC	237.753
ccc	GFPCCC	256.834
ccc	GFPCCC	221.624
ccc	GFPCCC	162.125
ccc	GFPCCC	200.532
ccc	GFPCCC	111.054
ccc	GFPCCC	141.194
ccc	GFPCCC	94.806
ccc	GFPCCC	86.273
ccc	GFPCCC	117.445
ccc	GFPCCC	81.857
ccc	GFPCCC	94.999
ccc	GFPCCC	90.576
ccc	GFPCCC	93.684
ccc	GFPCCC	109.427
ccc	GFPCCC	109.03
ccc	GFPCCC	108.295
ccc	GFPCCC	133.882
ccc	GFPCCC	201.896
ccc	GFPCCC	174.08
ccc	GFPCCC	167.115
ccc	GFPCCC	178.45
ccc	GFPCCC	170.471
ccc	GFPCCC	223.426
ccc	GFPCCC	96.195
ccc	GFPCCC	109.537
ccc	GFPCCC	188.449
ccc	GFPCCC	200.994
ccc	GFPCCC	80.658
ccc	GFPCCC	159.454
ccc	GFPCCC	136.52
ccc	GFPCCC	138.016
ccc	GFPCCC	133.822
ccc	GFPCCC	158.882
ccc	GFPCCC	106.635
ccc	GFPCCC	216.621
ccc	GFPCCC	158.982
ccc	GFPCCC	138.531
ccc	GFPCCC	154.31
ccc	GFPCCC	138.971
ccc	GFPCCC	164.204
ccc	GFPCCC	145.816
ccc	GFPCCC	192.876
ccc	GFPCCC	185.497
ccc	GFPCCC	190.293
ccc	GFPCCC	147.859
ccc	GFPCCC	145.096
ccc	GFPCCC	209.819
ccc	GFPCCC	190.746
ccc	GFPCCC	119.739
ccc	GFPCCC	125.077
ccc	GFPCCC	179.918
ccc	GFPCCC	203.015
ccc	GFPCCC	220.026
ccc	GFPCCC	156.712
ccc	GFPCCC	216.841
ccc	GFPCCC	114.199
ccc	GFPCCC	159.704
ccc	GFPCCC	139.099
ccc	GFPCCC	179.092
ccc	GFPCCC	194.085
ccc	GFPCCC	132.546
ccc	GFPCCC	152.165
