# Supplementary material for: Plant Trans-Golgi Network/Early Endosome pH regulation requires Cation Chloride Cotransporter (CCC1)
Source: eLife. 2022 Jan 6;11:e70701. doi: 10.7554/eLife.70701 (PMC8791640; doi:10.7554/eLife.70701)
Supplement: Figure 4—source data 1. [file elife-70701-fig4-data1.xlsx]

## Sheet: Fig4A
Experiment	0									150									300									450									600
	Wt			ccc1			ccc2			Wt			ccc1			ccc2			Wt			ccc1			ccc2			Wt			ccc1			ccc2			Wt			ccc1			ccc2
	Germinated	Seeds	%	Germinated	Seeds	%	Germinated	Seeds	%	Germinated	Seeds	%	Germinated	Seeds	%	Germinated	Seeds	%	Germinated	Seeds	%	Germinated	Seeds	%	Germinated	Seeds	%	Germinated	Seeds	%	Germinated	Seeds	%	Germinated	Seeds	%	Germinated	Seeds	%	Germinated	Seeds	%	Germinated	Seeds	%
1	31	33	0.939394	26	32	0.8125	22	22	1	34	35	0.971429	28	35	0.8	35	35	1	29	35	0.828571	28	35	0.8	34	35	0.971429	19	36	0.527778	25	35	0.714286	29	36	0.805556	4	36	0.111111	14	33	0.424242	8	33	0.242424
2	31	35	0.885714	33	33	1	22	22	1	34	35	0.971429	33	35	0.942857	36	36	1	31	33	0.939394	32	33	0.969697	29	33	0.878788	12	32	0.375	28	33	0.848485	16	31	0.516129	2	35	0.0571429	10	35	0.285714	2	35	0.0571429
3	32	33	0.969697	33	33	1	32	32	1	34	36	0.944444	34	36	0.944444	35	36	0.972222	21	32	0.65625	29	33	0.878788	32	33	0.969697	9	36	0.25	22	36	0.611111	25	36	0.694444	0	33	0	2	36	0.0555556	12	35	0.342857
4	33	33	1	32	33	0.969697	33	33	1	33	33	1	33	33	1	32	33	0.969697	17	33	0.515152	33	33	1	30	33	0.909091	4	33	0.121212	28	33	0.848485	23	31	0.741935	0	31	0	11	33	0.333333	2	32	0.0625
5	30	30	1	29	30	0.966667	30	30	1	30	30	1	30	30	1	28	29	0.965517	24	30	0.8	28	29	0.965517	30	30	1	6	29	0.206897	28	30	0.933333	13	28	0.464286	1	32	0.03125	7	30	0.233333	9	32	0.28125
6	30	30	1	29	30	0.966667	30	30	1	30	30	1	29	30	0.966667	29	29	1	30	30	1	29	30	0.966667	27	30	0.9	16	28	0.571429	28	30	0.933333	20	30	0.666667	0	30	0	4	30	0.133333	8	30	0.266667

## Sheet: Fig4C
Experiment 1			Number						%
			No Collet	1-2 Collet	Incomplete Ring	Complete Ring	Total		No Collet	1-2 Collet	Incomplete Ring	Complete Ring
	0	Wt				24	24		0	0	0	1
		ccc1	22	8			30		0.733333	0.266667	0	0
		ccc2	20	1			21		0.952381	0.047619	0	0
	150	Wt				30	30		0	0	0	1
		ccc1		1	10	15	26		0	0.0384615	0.384615	0.576923
		ccc2	1	7	20	7	35		0.0285714	0.2	0.571429	0.2
	300	Wt				16	16		0	0	0	1
		ccc1			1	27	28		0	0	0.0357143	0.964286
		ccc2			8	13	21		0	0	0.380952	0.619048
	450	Wt			1	2	3		0	0	0.333333	0.666667
		ccc1		1	4	13	18		0	0.0555556	0.222222	0.722222
		ccc2			5	11	16		0	0	0.3125	0.6875
	600	Wt					0		#DIV/0!	#DIV/0!	#DIV/0!	#DIV/0!
		ccc1					0		#DIV/0!	#DIV/0!	#DIV/0!	#DIV/0!
		ccc2					0		#DIV/0!	#DIV/0!	#DIV/0!	#DIV/0!
Experiment 2			Number						%
			No Collet	1-2 Collet	Incomplete Ring	Complete Ring	Total		No Collet	1-2 Collet	Incomplete Ring	Complete Ring
	0	Wt			3	17	20		0	0	0.15	0.85
		ccc1	14	4			18		0.777778	0.222222	0	0
		ccc2	21	1			22		0.954545	0.0454545	0	0
	150	Wt				26	26		0	0	0	1
		ccc1		6	9	9	24		0	0.25	0.375	0.375
		ccc2		3	6	2	11		0	0.272727	0.545455	0.181818
	300	Wt				23	23		0	0	0	1
		ccc1			3	22	25		0	0	0.12	0.88
		ccc2		1	10	11	22		0	0.0454545	0.454545	0.5
	450	Wt				6	6		0	0	0	1
		ccc1			1	22	23		0	0	0.0434783	0.956522
		ccc2			1	8	9		0	0	0.111111	0.888889
	600	Wt					0		#DIV/0!	#DIV/0!	#DIV/0!	#DIV/0!
		ccc1					0		#DIV/0!	#DIV/0!	#DIV/0!	#DIV/0!
		ccc2					0		#DIV/0!	#DIV/0!	#DIV/0!	#DIV/0!
Experiment 3			Number						%
			No Collet	1-2 Collet	Incomplete Ring	Complete Ring	Total		No Collet	1-2 Collet	Incomplete Ring	Complete Ring
	0	Wt			3	22	25		0	0	0.12	0.88
		ccc1	9	14			23		0.391304	0.608696	0	0
		ccc2	18	7			25		0.72	0.28	0	0
	150	Wt			2	27	29		0	0	0.0689655	0.931034
		ccc1			9	16	25		0	0	0.36	0.64
		ccc2		5	16	3	24		0	0.208333	0.666667	0.125
	300	Wt				24	24		0	0	0	1
		ccc1				18	18		0	0	0	1
		ccc2			8	13	21		0	0	0.380952	0.619048
	450	Wt			3	12	15		0	0	0.2	0.8
		ccc1			2	16	18		0	0	0.111111	0.888889
		ccc2			1	12	13		0	0	0.0769231	0.923077
	600	Wt					0		#DIV/0!	#DIV/0!	#DIV/0!	#DIV/0!
		ccc1					0		#DIV/0!	#DIV/0!	#DIV/0!	#DIV/0!
		ccc2					0		#DIV/0!	#DIV/0!	#DIV/0!	#DIV/0!

## Sheet: Fig4D
Experiment	0									75									150									225									300
	Wt			ccc1			ccc2			Wt			ccc1			ccc2			Wt			ccc1			ccc2			Wt			ccc1			ccc2			Wt			ccc1			ccc2
	Germinated	Seeds	%	Germinated	Seeds	%	Germinated	Seeds	%	Germinated	Seeds	%	Germinated	Seeds	%	Germinated	Seeds	%	Germinated	Seeds	%	Germinated	Seeds	%	Germinated	Seeds	%	Germinated	Seeds	%	Germinated	Seeds	%	Germinated	Seeds	%	Germinated	Seeds	%	Germinated	Seeds	%	Germinated	Seeds	%
1	31	33	0.939394	26	32	0.8125	22	22	1	30	36	0.833333	23	33	0.69697	32	33	0.969697	25	36	0.694444	25	36	0.694444	32	34	0.941176	0	41	0	7	38	0.184211	8	35	0.228571	0	39	0	0	32	0	0	33	0
2	31	35	0.885714	33	33	1	22	22	1	32	34	0.941176	32	36	0.888889	36	36	1	23	37	0.621622	37	39	0.948718	35	39	0.897436	2	32	0.0625	1	32	0.03125	0	32	0	0	34	0	0	36	0	0	24	0
3	32	33	0.969697	33	33	1	32	32	1	32	35	0.914286	32	36	0.888889	33	35	0.942857	16	32	0.5	26	33	0.787879	33	33	1	0	38	0	3	50	0.06	19	39	0.487179	0	35	0	0	30	0	0	34	0
4	33	33	1	32	33	0.969697	33	33	1	28	30	0.933333	28	30	0.933333	28	29	0.965517	20	32	0.625	29	33	0.878788	29	32	0.90625	0	32	0	1	33	0.030303	3	33	0.0909091
5	30	30	1	29	30	0.966667	30	30	1	33	33	1	28	31	0.903226	32	33	0.969697	28	30	0.933333	28	30	0.933333	30	30	1	0	30	0	1	30	0.0333333	7	29	0.241379
6	30	30	1	29	30	0.966667	30	30	1	27	27	1	26	27	0.962963	25	26	0.961538	29	33	0.878788	27	33	0.818182	29	32	0.90625	0	29	0	0	29	0	6	28	0.214286

## Sheet: Fig4F
Experiment 1			Number						%
			No Collet	1-2 Collet	Incomplete Ring	Complete Ring	Total		No Collet	1-2 Collet	Incomplete Ring	Complete Ring
	0	Wt				24	24		0	0	0	1
		ccc1	22	8			30		0.733333	0.266667	0	0
		ccc2	20	1			21		0.952381	0.047619	0	0
	75	Wt			3	22	25		0	0	0.12	0.88
		ccc1		6	7	5	18		0	0.333333	0.388889	0.277778
		ccc2	4	8	3		15		0.266667	0.533333	0.2	0
	150	Wt			4	10	14		0	0	0.285714	0.714286
		ccc1		1	10	11	22		0	0.0454545	0.454545	0.5
		ccc2		6	4		10		0	0.6	0.4	0
	225	Wt					0		#DIV/0!	#DIV/0!	#DIV/0!	#DIV/0!
		ccc1					0		#DIV/0!	#DIV/0!	#DIV/0!	#DIV/0!
		ccc2					0		#DIV/0!	#DIV/0!	#DIV/0!	#DIV/0!
	300	Wt					0		#DIV/0!	#DIV/0!	#DIV/0!	#DIV/0!
		ccc1					0		#DIV/0!	#DIV/0!	#DIV/0!	#DIV/0!
		ccc2					0		#DIV/0!	#DIV/0!	#DIV/0!	#DIV/0!
Experiment 2			Number						%
			No Collet	1-2 Collet	Incomplete Ring	Complete Ring	Total		No Collet	1-2 Collet	Incomplete Ring	Complete Ring
	0	Wt			3	17	20		0	0	0.15	0.85
		ccc1	14	4			18		0.777778	0.222222	0	0
		ccc2	21	1			22		0.954545	0.0454545	0	0
	75	Wt			2	21	23		0	0	0.0869565	0.913043
		ccc1		4	4	3	11		0	0.363636	0.363636	0.272727
		ccc2	1	4	5	3	13		0.0769231	0.307692	0.384615	0.230769
	150	Wt		1	3	20	24		0	0.0416667	0.125	0.833333
		ccc1			5	12	17		0	0	0.294118	0.705882
		ccc2	1	2	9	8	20		0.05	0.1	0.45	0.4
	225	Wt					0		#DIV/0!	#DIV/0!	#DIV/0!	#DIV/0!
		ccc1					0		#DIV/0!	#DIV/0!	#DIV/0!	#DIV/0!
		ccc2					0		#DIV/0!	#DIV/0!	#DIV/0!	#DIV/0!
	300	Wt					0		#DIV/0!	#DIV/0!	#DIV/0!	#DIV/0!
		ccc1					0		#DIV/0!	#DIV/0!	#DIV/0!	#DIV/0!
		ccc2					0		#DIV/0!	#DIV/0!	#DIV/0!	#DIV/0!
Experiment 3			Number						%
			No Collet	1-2 Collet	Incomplete Ring	Complete Ring	Total		No Collet	1-2 Collet	Incomplete Ring	Complete Ring
	0	Wt			3	22	25		0	0	0.12	0.88
		ccc1	9	14			23		0.391304	0.608696	0	0
		ccc2	18	7			25		0.72	0.28	0	0
	75	Wt		1	4	16	21		0	0.047619	0.190476	0.761905
		ccc1		1	12	6	19		0	0.0526316	0.631579	0.315789
		ccc2	2	7	5	1	15		0.133333	0.466667	0.333333	0.0666667
	150	Wt			2	15	17		0	0	0.117647	0.882353
		ccc1			8	10	18		0	0	0.444444	0.555556
		ccc2			10	10	20		0	0	0.5	0.5
	225	Wt					0		#DIV/0!	#DIV/0!	#DIV/0!	#DIV/0!
		ccc1					0		#DIV/0!	#DIV/0!	#DIV/0!	#DIV/0!
		ccc2					0		#DIV/0!	#DIV/0!	#DIV/0!	#DIV/0!
	300	Wt					0		#DIV/0!	#DIV/0!	#DIV/0!	#DIV/0!
		ccc1					0		#DIV/0!	#DIV/0!	#DIV/0!	#DIV/0!
		ccc2					0		#DIV/0!	#DIV/0!	#DIV/0!	#DIV/0!

## Sheet: Fig4G
Time (mins)	2	Wt	RootHair1	25.271	RootHair2	10.062	RootHair3	0.936	RootHair4	6.084	RootHair5	7.02	RootHair6	6.786	RootHair7	25.505		ccc	RootHair1	12.87	RootHair2	7.254	RootHair3	6.318	RootHair4	7.02	RootHair5	15.444	RootHair6	9.126	RootHair7	12.402
	4			26.909		10.296		2.106		6.786		7.488		7.722		25.973				13.338		7.488		6.786		7.02		16.614		9.594		12.636
	6			28.547		10.998		3.276		7.254		7.956		8.658		28.079				13.806		7.956		7.254		7.254		18.252		10.062		13.104
	8			30.185		10.764		4.914		7.488		8.19		9.36		29.951				13.806		8.424		7.488		7.488		18.954		10.296		13.572
	10			32.291		11.232		6.786		8.19		9.126		9.594		31.121				14.04		9.36		7.956		7.488		19.89		10.53		14.508
	12			33.461		11.466		8.658		8.424		9.594		10.062		31.823				14.742		9.828		8.424		7.956		20.826		10.764		15.21
	14			35.567		12.636		10.53		8.424		10.296		10.296		34.163				15.444		10.764		9.126		8.19		21.761		10.998		15.912
	16			37.205		13.806		12.636		9.126		10.998		11.232		35.567				16.146		11.466		9.828		8.424		23.399		11.466		16.38
	18			39.545		14.508		14.742		9.126		12.168		12.402		36.971				16.614		12.168		10.296		8.892		24.335		12.168		16.614
	20			40.949		15.912		16.848		9.594		12.87		13.338		38.843				17.316		13.104		10.998		9.126		25.505		12.636		17.316
	22			42.587		17.316		18.954		9.828		13.806		14.04		40.013				17.55		13.806		11.466		9.36		26.207		13.338		18.486
	24			44.693		18.72		21.059		10.296		14.742		14.508		40.949				18.018		14.508		12.168		9.594		26.675		14.04		19.188
	26			46.565		20.592		23.399		11.232		15.912		15.444		43.055				18.954		15.21		12.87		9.828		27.845		14.508		20.358
	28			48.671		21.761		25.739		12.402		16.848		16.848		45.161				19.89		15.912		13.806		10.296		29.249		15.21		21.059
	30			50.309		22.931		28.313		12.636		18.018		18.018		46.097				20.592		16.614		14.742		10.764		30.419		15.678		21.995
	32			53.117		24.803		30.653		12.87		19.422		19.188		47.969				21.527		16.848		15.444		11.232		31.589		16.614		22.697
	34			55.223		26.675		32.993		12.87		20.358		19.89		49.139				21.527		17.784		16.38		11.934		32.525		17.55		23.633
	36			57.797		28.313		34.631		13.104		21.527		21.059		50.309				22.697		19.188		17.316		12.402		33.461		18.252		24.803
	38			60.137		30.185		36.503		13.104		22.463		22.463		52.649				23.399		19.656		18.252		12.87		34.631		18.954		26.207
	40			62.945		32.057		37.907		13.806		23.867		24.101		54.755				24.101		20.826		19.188		13.338		36.035		19.656		27.143
	42			64.348		34.163		40.715		14.742		25.271		25.271		55.925				25.739		21.527		19.89		13.806		36.971		20.826		28.079
	44			66.922		36.269		43.523		15.678		26.441		25.973		57.797				25.973		22.229		20.826		14.274		38.141		21.527		29.015
	46			69.964		38.141		45.161		16.848		27.845		26.909		60.137				26.675		23.399		21.761		14.742		39.545		22.463		30.185
	48			72.304		40.247		47.969		17.316		29.249		28.313		61.775				27.143		24.569		22.931		15.444		40.481		22.931		31.355
	50			73.24		42.587		49.607		17.784		30.419		29.951		63.88				27.611		25.271		23.867		16.146		41.417		23.867		32.525
	52			75.814		43.991		52.649		18.018		32.057		31.355		65.05				29.015		26.441		24.803		16.614		42.821		24.569		33.695
	54			78.388		46.097		56.861		18.018		32.993		32.291		66.454				29.249		26.675		25.973		17.082		43.289		25.037		34.865
	56			80.494		48.203		58.265		18.018		34.163		33.695		68.092				29.483		27.845		26.909		17.784		44.459		25.505		36.035
	58			82.6		50.309		60.371		19.422		35.567		35.099		70.198				31.121		29.015		27.845		18.72		45.395		25.973		37.205
	60			84.94		52.649		62.009		20.826		36.971		36.971		72.304				31.823		29.483		28.781		19.188		47.033		26.441		38.609
	62			90.322		55.223		64.582		21.995		38.141		38.375		73.24				33.929		30.653		29.951		19.89		48.203		26.909		39.545
	64			89.62		57.095		69.496		22.931		39.545		39.779		75.112				34.865		31.823		30.887		20.826		49.373		27.845		40.949
	66			91.726		59.669		70.9		23.165		40.715		40.949		77.218				35.567		32.759		31.823		21.527		50.543		28.313		42.119
	68			94.066		61.775		73.006		23.399		42.119		42.353		78.856				36.503		33.461		32.993		22.463		51.713		28.781		43.523
	70			96.172		63.88		76.048		23.867		43.523		43.991		81.664				37.673		34.397		34.163		23.165		52.415		29.249		44.693
	72			100.15		66.22		77.218		24.101		45.161		45.395		83.302				38.843		36.035		35.099		24.101		54.053		29.717		45.863
	74			101.788		68.794		79.792		25.973		46.565		47.033		84.004				38.609		37.205		36.035		25.271		55.223		30.653		47.033
	76			103.66		71.602		83.302		27.143		47.969		48.671		86.344				40.013		38.141		37.205		25.973		55.925		31.589		48.203
	78			106.233		73.474		85.174		28.547		49.373		50.075		88.918				41.651		38.609		38.375		26.909		57.563		32.057		49.607
	80			108.105		76.282		87.514		29.015		51.011		51.713		90.556				42.119		39.545		39.077		28.079		58.733		32.759		51.011
	82			109.977		78.856		89.62		29.717		52.415		52.883		91.726				42.821		41.183		40.247		28.781		59.669		33.695		51.947
	84			112.551		80.494		91.96		30.419		53.819		54.287		94.066				43.289		41.885		41.417		29.717		61.073		34.397		53.351
	86			114.423		83.302		94.534		32.057		55.223		55.691		95.47				43.757		42.821		41.885		30.653		62.243		35.567		54.989
	88			116.529		85.642		97.342		33.227		56.627		57.095		97.81				45.161		43.523		43.289		31.589		62.945		36.269		55.925
	90			119.103		88.216		99.682		34.397		58.031		58.499		99.916				45.629		43.991		44.225		32.759		63.88		36.971		57.095
	92			121.911		90.79		102.022		35.801		59.435		59.669		101.554				46.331		45.161		44.927		33.461		65.05		37.907		58.031
	94			124.251		93.364		104.596		36.269		61.073		60.839		102.49				47.033		46.097		46.097		34.397		65.986		39.077		58.967
	96			126.357		95.47		106.701		37.439		62.711		62.243		104.128				47.501		47.267		47.033		35.099		66.922		40.013		60.371
	98			129.165		97.81		109.041		39.077		64.114		63.412		105.765				47.735		48.437		47.969		35.801		67.624		40.949		62.009
	100			132.207		100.384		111.147		40.481		65.284		64.582		107.403				48.203		48.905		48.905		36.971		69.496		41.885		62.945
	102			133.845		102.958		113.955		41.885		66.688		65.752		109.041				50.309		49.607		49.607		37.907		69.496		43.055		63.88
	104			135.717		105.297		116.295		43.289		68.092		67.156		111.381				50.777		50.543		50.777		38.609		70.198		44.459		65.05
	106			138.057		107.871		118.167		44.225		69.73		68.326		112.785				51.479		51.479		51.479		39.779		70.9		45.161		66.454
	108			140.865		110.445		120.273		44.927		70.9		69.496		114.891				51.713		52.415		52.415		40.715		72.07		45.863		67.858
	110			143.673		112.551		122.613		46.097		72.538		70.9		116.529				51.713		53.351		53.351		41.651		73.24		47.033		69.028
	112			145.311		115.593		124.953		47.267		73.708		71.836		117.699				52.181		54.053		54.287		42.821		74.176		47.969		69.73
	114			148.118		118.167		127.059		48.671		74.878		73.24		119.337				53.585		54.755		54.989		43.523		75.112		48.671		70.666
	116			150.692		120.507		128.931		50.309		76.048		74.644		121.443				54.053		56.861		56.159		44.693		76.048		49.373		72.07
	118			152.798		123.315		130.569		51.479		77.218		75.58		122.379				54.287		57.329		57.095		45.863		77.218		50.543		73.474
	120			154.67		125.655		132.207		52.415		78.154		76.048		123.783				54.755		58.499		58.031		46.799		77.92		51.713		74.644
	122			156.542		127.995		134.313		53.819		79.324		76.984		125.421				55.223		59.435		59.201		47.969		78.856		52.649		75.814
	124			159.116		131.037		136.419		54.989		80.026		77.92		126.825				56.159		59.903		59.903		48.905		80.26		53.819		77.218
	126			161.222		133.143		138.993		56.159		80.962		78.856		128.697				56.627		60.137		60.839		50.075		81.196		54.989		77.92
	128			164.264		135.249		140.865		57.563		81.664		79.792		130.569				56.393		61.073		61.541		51.245		81.664		56.393		78.622
	130			165.434		137.589		142.737		58.967		82.366		80.494		131.739				57.797		62.243		62.009		52.181		82.834		56.861		79.324
	132			168.008		139.929		144.843		59.903		83.302		81.43		132.675				58.265		62.477		63.178		53.117		84.238		57.797		80.026
	134			169.646		142.269		146.481		61.073		84.004		82.366		133.845				58.733		62.945		64.348		54.053		84.706		58.499		81.664
	136			171.284		145.077		148.352		62.477		84.706		83.068		135.951				58.967		64.114		64.816		54.989		85.174		59.669		82.132
	138			173.39		146.949		150.926		63.646		85.642		83.77		137.589				59.201		64.816		65.284		56.159		85.876		60.371		82.132
	140			175.496		149.288		152.798		65.284		86.578		84.472		139.227				59.903		65.518		66.22		56.861		87.748		61.541		82.366
	142			176.9		152.096		153.968		66.688		87.28		85.174		140.631				60.137		65.986		67.624		57.797		87.982		62.477		82.366
	144			178.07		154.436		155.84		67.858		87.982		85.876		141.567				61.073		66.454		68.326		58.967		89.152		63.646		82.366
	146			180.878		156.776		157.01		68.56		88.45		86.578		142.971				61.307		67.624		69.028		59.669		89.62		64.816		82.366
	148			181.346		158.882		158.414		69.496		88.684		87.28		144.375				61.541		68.794		69.73		60.605		90.79		65.752		82.6
	150			182.984		161.456		160.286		70.666		89.152		87.748		145.545				61.775		69.496		70.198		61.541		91.492		66.454
	152			185.324		163.328		161.924		72.07		89.854		88.216		146.481				61.775		68.794		70.9		62.477		92.662		67.156
	154			186.26		165.434		164.03		73.24		90.322		89.152		147.416				62.243		70.666		71.836		63.412		93.13		68.326
	156			188.132		167.774		165.668		74.176		90.79		89.854		148.118				62.945		70.666		72.304		64.348		93.598		69.262
	158			189.769		169.646		167.072		75.346		91.258		90.322		150.224				63.412		71.134		72.772		65.284		94.534		70.432
	160			190.471		171.518		168.944		76.282		91.726		90.79		151.628				63.646		72.07		73.24		66.22		95.236		71.602
	162			191.641		174.092		170.114		77.452		91.96		91.258		152.564				63.88		72.772		73.708		67.156		95.938		72.538
	164			193.045		176.198		171.986		78.622		92.194		92.194		153.5				63.88		73.474		74.644		68.326		96.64		73.24
	166			193.747		178.07		173.39		79.558		92.662		93.13		154.67				64.348		73.942		75.112		69.028		97.342		74.176
	168			195.385		179.942		175.028		80.728		92.896		93.598		155.606				64.348		74.41		75.346		70.198		98.044		75.112
	170			196.321		182.048		176.432		81.898		93.13		94.066		156.542				64.348		75.112		76.048		70.9		98.746		76.516
	172			197.023		183.686		178.538		83.068		93.364		94.534		157.946				64.348		75.58		76.282		72.07		99.448		77.218
	174			197.959		185.324		179.708		84.004		93.598		95.002		159.584				64.582		76.048		76.516		73.24		99.916		77.92
	176			199.129		187.664		181.112		84.94		93.832		95.704		160.286				64.816		76.516		76.984		74.176		99.916		78.856
	178			200.299		189.769		182.984		85.876		94.066		96.406		160.988				65.05		76.984		77.452		75.112		100.852		79.558
	180			202.171		190.705		183.92		86.812		94.3		96.874		161.69				65.284		76.75		77.686		76.282		101.32		80.494
	182			203.341		192.811		185.09		87.982		94.3		97.108		162.158				65.752		77.452		78.388		77.218		102.022		81.664
	184			203.107		194.917		186.728		88.918		94.534		97.576		163.328				65.986		78.388		78.622		78.154		102.49		82.366
	186			204.043		195.853		188.6		89.854				98.278		164.264				66.22		79.09		78.856		79.09		103.192		83.536
	188			204.511		197.491		189.301		90.556				98.746		164.732				66.22		79.09		79.09		78.856		103.66		84.472
	190			205.681		199.597		190.705		91.258				99.214		165.668				66.454		79.792		79.09		81.43		103.426		84.94
	192			205.915		199.831		191.875		91.726				99.682		166.136				66.454		80.026		79.324		82.366		104.596		85.408
	194			205.681		201.703		193.279		92.428				99.916		166.838				66.454		80.494		79.324		83.302		104.83		86.578
	196			207.553		204.277		194.449		93.364				100.15		167.072				66.22		80.728		79.558		84.238		105.765		87.514
	198			208.255		205.681		195.619		94.3				100.384		167.774				66.454		81.43		79.558		84.94		105.531		88.216
	200			208.489		207.085		196.555		95.002				100.852		168.008				66.454		81.664		80.026		86.11		106.233		89.152
	202			208.723		208.489		197.725		95.47				101.086		168.476						81.898		80.26		87.046		106.935		89.854
	204			209.191		209.893		198.427		95.938				101.554		169.178						82.132		80.728		88.216		107.169		90.79
	206			209.191		210.829		199.363		96.64				101.554		169.646						82.366		81.196		88.918		107.403		91.96
	208			209.659		212.701		200.299		97.342				101.788		170.816						82.366		81.43		89.854		108.807		92.896
	210			209.191		212.935		201.703		98.512				102.022		170.816						82.834		81.43		90.556		109.041		93.832
	212			210.361		214.573		202.639		98.98				102.022		171.518						83.302		81.43		91.258		109.041		95.002
	214			210.361		215.743		203.341						102.256		171.752						83.77		81.664		92.194		109.509		95.704
	216			210.829		217.381		204.043						102.49		172.22						84.004		81.664		93.13		109.977		96.64
	218			211.531		219.019		204.745						102.724		172.688						84.004		81.664		94.066		110.445		97.342
	220			211.531		219.487		205.447						103.192		172.922						84.472		81.898		94.768		110.211		98.278
	222			211.765		220.189		206.149						103.426		173.156						84.706		81.898		95.47		110.679		99.214
	224			211.765		220.657		207.085						103.66		173.39						84.94				96.172		111.849		99.916
	226			211.999		221.359		207.787						103.66		173.39						85.174				96.874		111.849		100.618
	228			211.999		221.827		208.255						103.894		174.326						85.174				97.576		112.551		101.32
	230			212.467		223.699		208.489						103.894		174.092						85.174				98.512		112.551		102.022
	232			212.701		224.635		208.489						104.128		174.56						85.408				99.214		112.317		102.958
	234			212.701		225.337		209.659								174.56						86.11				100.15		112.785		103.894
	236			212.935		227.209		210.361								175.028						85.642				100.618		112.785		105.064
	238			212.701		227.677		211.063								175.028						85.642				101.554		113.019		105.531
	240			213.637		228.379		211.531								175.496						86.578				102.256		113.253		106.233
	242					229.081		211.531								175.496						86.344				102.724		113.253		107.169
	244					229.081		211.999								175.73						86.578				103.192		113.955		107.871
	246					230.251		212.233								175.964						86.578				103.66		114.423		108.105
	248					230.485		212.935								176.432						86.344				104.362		114.657		109.041
	250					231.186		213.169														86.578				104.83		115.125		110.211
	252					232.122		213.637														86.812				105.531		115.125		111.381
	254					232.122		213.871														86.812				106.233		115.359		112.083
	256					232.356		214.339														87.514				106.701		115.359		112.785
	258					232.824		214.573														87.28				107.169		115.125		113.253
	260					233.292		215.275														87.514				107.637		114.891		113.955
	262							215.509														87.514				108.105		114.891		114.657
	264							215.509														87.28				108.573		115.593		115.593
	266							215.977														87.748				109.041				116.295
	268							216.445														87.748				109.509				116.997
	270							216.211														87.748				109.743				117.699
	272							216.445														87.514				109.977				118.167
	274							217.147														87.748				110.211				118.869
	276							217.381														87.982				110.679				119.337
	278							217.615														87.982				110.913				120.507
	280							217.849														87.982				111.381				121.209
	282							217.615																		111.615				121.677
	284							217.849																		111.849				122.145
	286							218.083																		112.317				122.613
	288							218.083																		112.551				123.315
	290							218.317																		112.785				124.017
	292							218.551																		113.019				124.485
	294							218.317																		113.253				124.953
	296							218.551																		113.253				125.187
	298							218.551																		113.487				125.421
	300							218.551																		113.487				125.655
	302							219.019																		113.721				126.591
	304							219.019																		113.955				127.293
	306							218.785																		114.189				128.229
	308							219.253																		114.189				128.463
	310							219.253																		114.423				128.697
	312							219.487																		114.657				128.697
	314							219.253																		114.891				129.165
	316							219.955																		114.891				129.399
	318							219.721																		115.125				130.335
	320							219.721																		115.359				131.271
	322							219.721																		115.359				131.973
	324							220.189																						132.675
																														132.909
																														133.143
																														133.143
																														133.143
																														133.143
																														133.377
																														133.377
																														133.611
																														133.845
																														134.313
																														135.015
																														135.483
																														135.717
																														135.951
																														135.951
																														135.951
																														135.951
																														136.185
																														136.185
																														136.185
																														136.185
																														136.419

## Sheet: Fig4H
Time (mins)	2	Wt	RootHair1	14.742	RootHair2	19.89	RootHair3	30.653	RootHair4	7.722	RootHair5	2.34	RootHair6	23.399				ccc	RootHair1	35.567	RootHair2	27.143	RootHair3	10.764	RootHair4	17.784	RootHair5	16.146	RootHair6	5.616	RootHair7	18.252	RootHair8	5.382	RootHair9	3.276	RootHair10	17.316	RootHair11	9.828
	4			14.508		19.656		32.525		7.956		2.808		24.569						37.205		27.611		12.168		19.422		17.55		5.85		19.656		5.85		4.212		18.252		10.062
	6			14.976		19.422		34.163		7.956		3.042		25.739						38.609		27.845		13.572		20.358		19.188		6.786		20.826		6.084		4.914		18.954		10.53
	8			14.742		19.656		35.801		8.892		3.51		26.909						40.013		29.249		14.508		21.527		20.358		7.488		21.995		6.552		5.85		19.422		11.232
	10			14.976		19.422		38.141		8.892		4.212		28.547						40.949		29.951		15.444		22.463		21.527		8.19		23.399		7.722		7.02		19.89		11.934
	12			15.21		19.89		40.013		9.594		4.68		30.419						42.119		30.653		16.614		23.399		22.931		8.892		25.037		8.424		8.658		20.826		12.87
	14			15.444		19.656		42.119		10.062		5.148		30.887						43.289		30.653		17.784		25.037		24.569		9.828		26.207		9.36		10.53		21.761		14.04
	16			15.678		19.656		44.225		10.764		5.85		31.823						44.927		31.121		19.188		26.675		25.973		10.764		27.611		10.062		11.466		22.229		15.21
	18			16.38		19.422		46.097		10.998		6.552		32.993						46.331		31.355		20.826		27.611		27.611		11.7		29.015		10.53		13.104		22.931		16.38
	20			17.082		19.422		48.437		11.7		7.254		34.397						47.969		31.355		22.229		29.249		29.249		12.636		30.653		11.232		14.742		23.867		17.316
	22			17.784		18.954		50.309		12.402		7.956		36.035						49.373		31.589		24.101		30.887		30.887		13.806		32.057		11.7		16.146		25.037		17.55
	24			18.018		19.188		52.883		13.338		8.892		37.439						50.543		32.759		25.505		32.525		32.525		14.976		33.695		12.402		17.55		26.441		18.72
	26			18.486		19.656		54.989		14.04		9.594		36.971						52.181		33.461		27.143		33.461		33.929		16.146		35.099		13.104		18.72		27.611		19.422
	28			18.954		19.188		57.563		14.976		10.53		37.439						53.351		34.163		28.781		34.631		35.567		17.784		36.503		13.806		19.89		29.249		20.358
	30			19.656		19.422		59.669		15.678		11.232		39.311						54.755		35.099		30.419		36.035		37.205		19.188		37.439		14.742		21.527		30.653		19.422
	32			20.358		19.656		62.243		16.848		11.934		40.481						56.627		35.099		32.057		36.971		38.843		20.358		37.673		15.678		24.101		32.057		20.592
	34			21.059		19.89		64.816		18.486		12.87		42.353						58.499		35.801		33.695		38.141		40.247		21.761		37.907		17.316		26.207		32.993		21.995
	36			21.761		19.89		67.156		19.656		13.806		43.991						59.669		36.503		35.333		39.545		42.119		23.165		38.843		18.252		28.547		33.695		22.697
	38			22.229		19.89		69.73		21.293		14.742		46.097						61.307		37.673		36.971		41.417		43.523		25.271		40.013		19.89		30.419		35.567		24.101
	40			22.463		20.124		72.07		22.697		15.912		48.203						62.711		37.673		38.609		42.587		45.161		26.909		42.119		21.293		32.291		36.737		25.271
	42			22.931		20.358		74.878		24.569		17.082		50.777						64.348		38.375		40.715		44.927		46.799		28.547		43.991		23.165		34.163		38.609		25.973
	44			23.399		20.592		77.686		26.441		18.018		52.883						66.22		39.077		42.353		46.565		48.437		30.653		45.629		24.101		36.503		40.481		27.611
	46			24.335		20.592		80.026		28.313		19.422		55.223						67.858		39.311		44.225		47.735		50.075		32.291		47.501		25.271		38.375		42.119		27.377
	48			25.505		20.826		83.77		30.185		20.826		57.329						69.496		40.949		46.097		49.373		51.713		33.461		49.139		26.675		40.481		43.289		27.377
	50			26.207		21.059		86.344		32.291		21.995		59.435						71.368		41.651		47.735		50.543		53.351		34.631		51.011		28.547		42.587		45.629		28.547
	52			26.909		21.059		89.152		34.163		23.399		61.775						72.772		42.587		49.373		52.649		54.755		38.609		53.585		30.185		44.927		47.033		29.951
	54			27.611		21.293		91.96		36.269		24.803		64.582						74.41		43.523		51.011		53.819		56.393		40.013		55.223		32.057		47.033		47.969		31.823
	56			27.845		21.527		94.3		38.141		26.207		67.156						75.58		43.289		52.883		55.925		58.265		41.651		57.329		33.929		49.139		50.777		32.993
	58			28.313		21.995		97.576		39.779		27.845		69.964						77.218		44.225		54.755		57.095		59.669		43.757		59.201		35.801		51.011		52.415		34.397
	60			29.483		21.995		100.384		42.119		29.249		72.538						78.856		45.629		56.159		58.967		61.307		45.161		61.541		38.141		53.351		54.521		35.801
	62			30.185		22.229		103.426		44.225		30.887		75.112						80.494		45.395		58.031		60.137		63.178		46.799		63.412		40.013		55.223		55.925		36.737
	64			31.355		22.229		105.765		46.799		32.525		77.686						81.898		46.799		60.137		61.307		64.582		48.203		65.518		42.821		57.329		58.265		38.375
	66			31.823		22.697		108.339		48.437		33.929		80.26						83.536		47.735		61.775		63.412		66.22		50.543		67.39		44.225		59.435		59.669		40.013
	68			32.525		22.931		110.913		50.777		35.801		82.834						84.94		48.905		63.646		64.348		67.624		53.585		69.964		46.799		61.775		61.307		41.417
	70			33.227		23.165		113.721		51.947		37.907		85.642						86.812		49.607		65.284		65.986		69.262		55.223		71.836		48.905		63.88		62.945		43.055
	72			34.163		23.399		116.295		52.181		39.779		88.216						88.45		50.543		66.922		67.858		70.9		56.393		73.708		50.777		66.22		65.284		44.693
	74			35.333		23.399		119.337		52.649		41.885		90.556						90.088		50.777		68.56		69.028		72.538		60.137		75.814		53.819		68.326		67.39		45.863
	76			36.269		23.399		123.081		52.883		43.757		93.832						91.726		51.479		70.432		71.134		74.176		61.307		77.92		55.691		70.9		69.496		47.267
	78			37.205		23.633		125.187		53.585		45.629		96.172						93.13		51.947		72.07		72.772		75.814		64.348		80.494		58.265		72.538		70.666		48.437
	80			37.907		23.867		127.995		54.989		47.735		98.512						94.768		52.415		74.176		74.41		77.452		66.688		82.6		60.605		74.41		72.07		50.309
	82			38.843		23.867		131.037		56.861		49.841		100.852						96.406		53.117		75.814		76.048		78.856		69.028		84.94		62.477		76.516		74.644		51.947
	84			39.779		24.101		133.845		58.733		51.713		102.958						98.278		54.053		77.218		77.686		80.26		70.9		87.748		64.582		78.622		75.814		53.351
	86			41.183		24.335		136.653		61.307		53.819		105.297						99.916		54.755		78.856		78.154		81.898		73.708		89.854		66.922		81.43		78.154		54.755
	88			42.353		24.569		139.461		63.646		55.691		108.105						101.32		55.691		80.728		80.026		83.302		75.58		92.428		69.73		83.302		80.026		56.159
	90			44.225		24.569		142.737		66.22		57.563		108.105						102.724		56.159		82.366		81.664		84.706		77.452		94.3		71.602		85.642		81.196		58.031
	92			45.161		24.803		145.077		69.028		59.903		108.339						104.128		56.861		84.004		84.004		86.11		79.558		96.874		73.474		87.982		83.302		59.201
	94			46.097		25.037		147.884		70.9		62.009		108.105						105.765		58.031		85.642		84.472		87.748		81.43		99.214		73.942		90.322		85.174		60.839
	96			47.501		25.271		150.692		73.24		63.88		109.041						107.637		58.733		87.046		85.876		89.386		82.6		101.32		76.048		92.662		86.812		62.477
	98			48.905		25.505		153.266		75.814		65.752		108.573						109.275		59.435		88.684		89.152		91.024		86.11		103.426		78.856		94.768		88.684		63.88
	100			50.543		25.271		155.84		77.92		67.858		108.573						111.381		59.435		89.62		89.152		92.428		87.982		105.297		80.962		97.108		91.024		64.816
	102			51.245		25.973		158.882		79.792		69.964		109.041						113.019		60.371		91.726		92.428		94.066		90.322		108.105		84.004		99.214		93.364		65.986
	104			53.117		25.505		160.988		82.6		72.538		109.509						114.423		61.073		93.13		93.13		95.704		91.492		110.445		86.11		101.554		95.236		67.858
	106			54.521		26.207		163.562		84.238		74.878		109.977						115.827		61.541		94.066		95.236		97.342		93.832		112.551		88.45		103.66		97.342		69.262
	108			55.691		25.505		165.668		87.046		77.218		110.445						117.231		62.243		96.172		96.64		99.214		96.874		115.359		91.024		105.999		98.98		70.198
	110			57.095		25.271		168.71		89.62		79.09		110.913						118.869		62.477		97.81		98.278		100.618		99.214		117.465		93.364		107.871		101.086		71.836
	112			58.031		26.909		168.944		91.726		81.43		112.551						120.507		63.646		98.044		99.448		102.49		101.554		119.571		95.47		110.211		102.49		73.24
	114			59.435		26.909		169.412		93.832		83.77		114.657						122.379		64.114		99.682		101.086		103.894		103.894		122.379		98.278		112.083		104.128		74.878
	116			60.605		26.675		169.412		95.704		86.11		116.763						123.783		63.88		101.32		102.49		105.531		105.999		121.209		100.852		114.189		106.467		76.282
	118			61.541		26.909		169.646		98.512		88.684		118.869						125.187		64.348		103.192		102.49		106.701		107.169		122.379		102.958		116.529		109.041		77.686
	120			63.412		27.377		169.412		101.086		91.258		121.443						126.357		64.816		104.83		104.362		108.339		108.807		121.911		105.765		119.337		110.679		79.09
	122			65.05		27.611		169.646		103.426		93.598		123.783						127.995		65.518		105.765		107.169		109.977		113.721		122.613		107.871		121.209		111.849		80.728
	124			66.454		27.611		169.646		105.297		95.938		126.357						129.633		65.986		107.403		109.977		111.615		114.423		122.613		110.445		124.017		113.955		82.366
	126			67.858		27.377		169.412		108.105		98.278		128.931						131.505		67.156		108.573		110.913		113.487		116.763		122.847		113.019		125.889		115.827		84.004
	128			70.198		27.377		169.412		110.211		100.852		131.271						133.377		68.092		109.977		112.551		115.125		118.635		123.081		115.593		128.229		117.465		84.94
	130			71.134		27.845		169.646		112.551		103.192		134.547						134.781		68.326		111.147		113.487		116.529		121.677		123.081		118.635		130.569		119.103		87.046
	132			72.538		27.611		169.88		114.657		105.531		137.121						135.951		68.794		112.785		114.891		118.401		124.485		123.549		121.209		132.675		120.741		88.216
	134			74.176		28.313		170.114		116.763		108.105		139.929						137.355		69.028		114.189		116.763		120.507		126.357		123.315		123.549		134.547		122.379		89.854
	136			75.112		28.313		170.114		118.635		110.211		142.269						138.993		69.262		115.125		119.571		122.145		127.995		123.783		126.123		137.121		124.485		90.79
	138			77.218		29.015		170.114		120.507		112.317		145.311						140.631		69.964		116.763		120.741		124.017		129.867		123.549		128.931		139.227		126.591		92.662
	140			78.622		29.249		170.816		123.783		114.657		147.182						142.971		70.666		117.699		122.379		125.889		131.973		123.549		131.505		141.333		128.463		94.066
	142			79.792		29.249		171.284		125.421		116.997		149.522						144.375		71.134		119.337		123.549		127.761		133.143		123.315		133.845		143.673		129.867		95.938
	144			80.728		28.781		171.986		127.995		119.571		151.628						145.545		71.368		120.273		125.655		129.633		135.015		123.783		136.185		145.311		131.271		96.874
	146			82.6		29.015		173.156		130.335		122.145		153.968						146.481		71.836		121.911		127.059		131.505		138.525				138.759		147.884		133.611		98.044
	148			83.77		29.015		175.028		133.377		124.719		156.308						147.65		71.836		123.315		128.697		133.143		140.397				142.035		149.522		135.483		99.448
	150			84.94		29.249		176.432		135.015		127.059		158.648						149.054		72.304		124.719		129.399		134.547		142.269				144.375		151.16		137.589		100.618
	152			86.578		28.781		178.538		137.355		129.165		161.222						150.692		73.006		126.123		131.505		136.653		144.609				146.715		153.032		139.227		102.022
	154			87.982		29.717		180.41		139.929		131.037		163.796						152.33		73.24		127.527		132.909		138.759		146.481				149.522		154.904		141.099		103.192
	156			88.918		30.185		181.814		142.035		131.037		166.604						154.67		73.474		128.931		134.313		140.163		148.352				151.394		157.01		142.503		104.362
	158			90.088		30.185		183.686		144.141		131.271		168.944						156.542		73.24		129.867		134.781		142.035		150.458				153.266		159.116		143.907		105.531
	160			91.258		30.419		185.558		146.247		131.271		171.05						158.18		73.708		130.803		136.419		143.439		151.628				155.138		160.052		146.013		106.935
	162			93.364		30.185		186.962		148.586		131.505		172.688						159.35		73.708		131.973		138.291		145.077		152.564				157.712		162.158		147.65		108.339
	164			94.3		30.185		188.6		151.16		131.739		174.092						161.456		73.708		132.441		139.227		147.416		155.372				159.818		163.562		149.288		109.977
	166			95.938		30.419		190.003		152.798		131.973		176.432						162.392		73.942		133.845		140.397		149.522		159.116				162.158		165.2		151.16		111.615
	168			96.172		30.653		191.173		154.904		132.207		178.304						164.03		73.942		134.781		141.099		151.16		160.754				164.498		166.604		153.266		112.317
	170			97.81		30.887		192.577		157.712		132.675		180.878						165.2		73.942		136.185		142.971		153.266		163.094				166.838		167.774		154.67		113.253
	172			99.682		30.653		194.215		159.818		133.143		182.984						166.37		73.708		137.589		143.673		155.138		166.136				168.71		168.944		156.542		115.593
	174			100.618		30.887		195.151		161.456		133.611		184.856						167.306		73.942		138.291		145.545		156.776		166.838				171.518		170.582		157.946		117.231
	176			101.788		30.887		196.087		163.562		134.547		186.962						168.944		74.176		139.929		147.182		158.882		168.476				173.39		172.922		159.35		118.167
	178			103.192		31.121		197.491		166.37		135.951		189.301						169.88		74.176		141.333		148.118		160.754		169.178				175.73		174.56		160.754		120.507
	180			104.83		30.887		198.661		168.476		137.823		191.173						171.284		74.41		142.971		148.586		163.094		169.646				177.602		175.964		162.626		121.911
	182			106.701		30.653		199.597		170.348		139.695		193.279						173.39		74.41		143.673		149.756		165.2		168.71				180.176		177.602		164.264		123.081
	184			108.105		31.355		200.767		173.156		141.801		196.087						175.262		74.176		144.843		151.862		166.37		169.88				181.814		179.006		165.2		124.251
	186			108.573		31.355		201.937		175.262		143.673		197.725						178.772		73.708		145.545		152.564		168.008		169.646				183.92		180.878		166.838		125.421
	188			110.679		31.355		203.341		176.666		145.545		199.363						179.708		74.644		146.481		153.968		169.88		170.348				186.026		182.516		168.476		125.655
	190			112.083		31.355		204.277		179.708		147.65		201.469						181.58		75.346		147.182		153.968		171.05		170.816				187.664		183.452		170.348		127.059
	192			113.721		31.589		205.213		181.346		149.054		203.809						182.282				148.82		156.308		172.454		170.816				188.6		185.09		171.752		128.697
	194			114.657		31.589		206.149		183.92		150.926		205.447						184.388				149.756		156.308		174.092		170.816				191.173		186.494		174.092		129.633
	196			116.061		31.589		207.319		185.324		152.798		207.319						186.026				150.926		157.712		176.432		170.582				193.747		187.664		176.198		130.101
	198			116.529		31.589		208.489		186.962		154.904		208.489						187.43				152.096		157.946		178.304		170.816				195.385		189.068		178.07		131.973
	200			118.635		31.589		209.191		190.003		156.776		210.127						187.898				153.5		158.882		180.644		170.816				196.555		189.769		180.176		133.377
	202			119.103		31.355		210.361		192.109		158.648		212.233						187.898				154.436		160.754		182.516		171.284				198.661		190.705		181.814		134.313
	204			119.805		31.589		210.829		194.215		160.286		213.871						188.132				155.606		161.456		184.856		171.284				199.597		192.109		183.218		135.483
	206			120.741		31.589		211.531		194.917		161.924		215.743						188.132				157.01		162.392		186.26		171.752				201.235		193.279		185.09		137.589
	208			122.379		31.589		212.233		197.725		163.328		217.615						188.366				158.18		163.328		187.898		172.688				203.575		194.449		186.026		138.057
	210			123.783		31.589		213.169		199.597		164.732		219.019										158.882		163.562		189.769		173.858				204.979		195.385		187.43		139.929
	212			124.719		31.589		213.871		201.001		166.136		220.657										159.584		164.264		191.875		174.56				206.617		196.321		189.301		140.397
	214			125.889		31.823		214.105		202.873		167.54		222.295										160.52		166.37		193.045		175.262				207.553		197.257		191.173		142.269
	216			125.889		31.823		214.807		205.915		169.178		223.465										161.924		164.264		194.917		175.496				209.659		198.193		193.045		144.843
	218			127.527		31.823		215.509		206.149		170.582		225.337										162.86		167.072		196.789		176.666				211.765		199.597		194.449		144.843
	220			127.761		31.589		215.977		209.191		171.986		226.975										164.03		167.072		197.959		176.666				213.169		200.533		195.385		146.715
	222			129.165				216.913		211.063		173.39		229.315										165.434		167.774		199.597		179.474				214.807		201.235		196.321		146.715
	224			130.335				217.381		213.403		174.56		230.251										166.604		170.582		201.235		180.644				216.211		201.937		198.427		149.054
	226			130.569				217.381		215.041		175.964		232.122										167.54		171.284		203.107		181.58				219.019		202.873		199.597		150.458
	228			131.739				218.083		216.913		177.368		233.76										168.008		172.454		204.277		182.75				219.253		203.809		201.235		151.394
	230			132.675				218.551		218.083		178.538		235.398										169.412		171.518		206.383		183.686				220.423		204.511		202.405		152.564
	232			131.973				219.019		220.189		179.708		236.802										170.582		174.326		208.255		184.154				222.061		205.447		203.575		153.734
	234			133.143				219.487		221.359		180.878		238.908										171.518		174.092		209.893		185.324				223.933		206.149		204.511		154.202
	236			134.547				219.955		225.103		182.048		239.844										173.39		173.624		211.297		185.792				224.869		206.617		205.915		155.606
	238			134.781				220.657		224.401		183.218		241.248										173.624		176.432		213.403		186.962				226.507		207.085		207.553		155.84
	240			135.249				220.891		226.507		183.92		243.12										174.56		177.602		215.041		187.664				229.081		208.021		208.723		157.946
	242			135.483				221.125		227.443		184.856		244.524										175.73		176.198		217.381		188.366				230.251		208.489		210.361		157.946
	244			136.653				221.359		228.613		185.558		246.162										176.666		176.9		219.487		188.834				230.719		208.957		211.999		159.116
	246			136.419				221.359		230.485		186.26		247.332										177.368		177.368		221.359		189.301				231.654		209.425		212.701		159.584
	248			137.823				222.295		232.122		186.962		248.268										177.836		179.24		222.997		189.769				232.824		209.893		213.871		162.158
	250			137.823				222.529		234.696		187.664		249.672										179.24		179.24		224.635		190.939				233.76		210.595		215.509		162.392
	252			139.227				222.763		235.398		188.6		251.544										180.644		179.708		226.273		191.641				235.164		211.063		215.275		163.094
	254			139.461				222.997		235.632		189.301		252.948										180.644		180.878		227.677		192.343				236.568		211.531		216.913		164.498
	256			139.227				222.997		237.738		189.769		254.586										181.58		184.154		229.081		192.577				238.206		211.999		217.381		165.902
	258			139.695				223.465		238.674		190.471		255.756										182.282		182.048		230.719		192.811				238.674		212.467		218.551		165.668
	260			141.099				223.699		241.716		191.173		256.458										182.984		182.75		232.122		193.513				239.844		212.935		219.487		168.008
	262			140.865				224.401		243.12		191.641		258.096										183.686		185.792		233.526		194.449				240.546		213.403		221.125		168.71
	264							224.167		244.29		192.343		258.564										184.856		185.792		234.696		194.917				241.248		213.871		221.125		169.412
	266							224.167		244.29		192.811		259.968										185.792		184.856		236.334		195.385				243.354		214.105		221.827		170.348
	268							224.401		247.098		193.513		260.904										186.26		185.792		237.504		195.853				243.354		214.339		223.465		169.88
	270							224.401		246.396		193.747		261.84										187.664		186.026		238.908		196.087				244.29		214.573		224.401		173.858
	272							224.635		248.268		194.449		262.308										187.43		186.728		239.844		196.321				244.524		215.041		225.337		173.156
	274							224.869		249.204		194.917		263.478										187.664		188.132		241.95		197.023				245.46		215.509		226.273		174.326
	276							225.103		251.544		195.151		264.414										189.068		190.003		243.588		197.023				246.162		215.743		226.741		173.858
	278							225.103		253.65		195.619		264.882										189.769		188.132		245.226		197.959				247.332		215.743		227.677		176.432
	280							225.337		253.65		196.087		266.052										190.471		192.577		246.864		198.427				247.332		215.977		228.379		176.666
	282									253.65		196.555		266.988										191.641		191.173		248.268		198.661				248.034		215.977		229.081		179.006
	284									255.522		196.789		267.456										192.343		192.811		249.438		198.895				249.438		216.445		230.485		178.772
	286									256.692		197.257		267.69										193.279		190.471		250.608		199.129				250.14		216.679		231.42		180.878
	288									257.16		197.491		268.86										193.513		193.045		251.544		199.597				250.374		216.679		231.42		180.41
	290									257.16		197.725		269.328										193.981		191.641		252.48		199.831				252.948		217.147		232.59		181.112
	292									259.032		197.959		270.03										194.683		192.577		252.948		200.065				252.714		217.381		233.76		184.622
	294									259.5		198.193		270.966										194.917		192.343		253.884		200.299				252.714		217.381		235.164		184.622
	296									261.84		198.193		270.966										195.619		195.385		255.522		200.767				253.65		217.615		235.398		185.324
	298									261.372		198.661		272.136										196.087		195.151		256.926		201.001				254.118		217.381		236.568		186.494
	300									262.074		198.895		274.241										197.023		194.917		257.862		201.001				255.054		217.849		237.504		187.43
	302									264.882		198.895		273.773										197.725		194.683		258.564		201.001				256.458		217.615		238.206		188.366
	304									264.648		199.129		274.007										197.725		193.513		259.734		201.235				255.522		217.849		239.376		189.301
	306									263.712		199.129		274.709										198.661		197.491		260.67		201.235				257.16		217.849		240.078		190.471
	308									265.35		199.363		274.709										199.597		198.193		261.606		201.235				256.458		217.849		240.78		190.939
	310									266.754		199.363		275.177										200.065		197.023		262.074		201.469				257.394		217.849		241.248		194.215
	312									268.158		199.597		275.645										200.767		196.321		263.244						257.394		218.083		242.652		191.173
	314									268.86		199.597		276.113										202.639		197.023		263.244						259.266				243.588		192.109
	316									268.158		199.831												201.937		197.959		264.18						258.564				244.29		194.215
	318									267.924		199.831												202.873		197.959		264.414						259.5				245.46		192.577
	320									270.264		200.065												203.341		198.895		264.882						258.798				245.46		193.279
	322									270.732														203.809		200.767		265.818						259.5				246.864		195.151
	324									270.498														203.809		199.597		266.052										247.098		194.215
										271.434														204.277		198.661		266.754										248.268		196.087
										272.37														204.979		199.363		266.988										249.672		196.789
										273.539														204.511		199.129		267.456										249.438		195.853
										272.37														205.447		201.001		267.69										250.14		197.023
										272.37														205.213		201.235		268.392										250.374		198.895
										274.943														206.851		202.405		269.094										251.31		199.129
										273.539														206.851		203.575		269.328										252.012		198.661
										273.072														206.617		201.235		269.796										252.246		199.597
										275.177														207.319		202.873												252.948		201.937
										274.475														207.085		202.639												254.82		200.767
										275.177														207.319		200.533												255.054		201.469
										276.581														208.723		204.277												254.82		202.405
																								208.957		204.979												255.288		201.937
																										204.043												256.224		201.703
																										204.277												257.394		202.405
																																						257.394		203.575
																																						259.032		204.277
																																						257.862		203.575
																																						259.5		203.107
																																						259.5		202.873
																																						260.436		206.149
																																						260.436		205.213
																																						262.308		206.617
																																						261.372		205.213
																																						261.84		206.851
																																						262.074		205.915
																																						262.308		206.149
																																						262.776		208.021
																																						263.478
																																						263.244
																																						263.946
																																						264.18
																																						264.882
																																						264.882
																																						265.818
																																						265.584
																																						266.754
																																						266.988
																																						266.052
																																						266.988
																																						267.924
																																						267.456
																																						267.456
																																						267.69
																																						268.626
																																						269.094
																																						269.094
																																						269.094
																																						268.392
																																						268.86
																																						269.562
																																						269.328
																																						269.796
																																						269.796
																																						269.796
																																						270.264
																																						270.732

## Sheet: Fig4Sup1A
Experiment	0									150									300									450									600
	Wt			ccc1			ccc2			Wt			ccc1			ccc2			Wt			ccc1			ccc2			Wt			ccc1			ccc2			Wt			ccc1			ccc2
	Germinated	Seeds	%	Germinated	Seeds	%	Germinated	Seeds	%	Germinated	Seeds	%	Germinated	Seeds	%	Germinated	Seeds	%	Germinated	Seeds	%	Germinated	Seeds	%	Germinated	Seeds	%	Germinated	Seeds	%	Germinated	Seeds	%	Germinated	Seeds	%	Germinated	Seeds	%	Germinated	Seeds	%	Germinated	Seeds	%
1	31	33	0.939394	26	32	0.8125	22	22	1	29	35	0.828571	16	21	0.761905				26	36	0.722222	20	34	0.588235	9	9	1	17	36	0.472222	24	36	0.666667	23	33	0.69697	1	36	0.0277778	12	34	0.352941	5	35	0.142857
2	31	35	0.885714	33	33	1	22	22	1	32	35	0.914286	35	36	0.972222	35	36	0.972222	28	32	0.875	25	32	0.78125	18	21	0.857143	17	34	0.5	33	36	0.916667	23	35	0.657143	0	32	0	3	32	0.09375	1	32	0.03125
3	32	33	0.969697	33	33	1	32	32	1	37	39	0.948718	37	39	0.948718	37	39	0.948718	23	36	0.638889	34	36	0.944444	33	34	0.970588	2	33	0.0606061	21	33	0.636364	22	33	0.666667	0	36	0	3	36	0.0833333	5	36	0.138889
4	33	33	1	32	33	0.969697	33	33	1	32	33	0.969697	32	33	0.969697	30	32	0.9375	15	32	0.46875	31	33	0.939394	32	33	0.969697	7	32	0.21875	26	32	0.8125	14	31	0.451613	0	31	0	5	33	0.151515	0	32	0
5	30	30	1	29	30	0.966667	30	30	1	30	30	1	29	30	0.966667	30	30	1	25	30	0.833333	30	30	1	29	30	0.966667	9	30	0.3	23	30	0.766667	23	30	0.766667	1	29	0.0344828	12	30	0.4	8	28	0.285714
6	30	30	1	29	30	0.966667	30	30	1	28	29	0.965517	30	30	1	29	30	0.966667	27	29	0.931034	29	30	0.966667	29	29	1	15	30	0.5	26	30	0.866667	24	29	0.827586	0	30	0	5	28	0.178571	9	30	0.3

## Sheet: Fig4Sup1C
Experiment 1			Number						%
			No Collet	1-2 Collet	Incomplete Ring	Complete Ring	Total		No Collet	1-2 Collet	Incomplete Ring	Complete Ring
	0	Wt				24	24		0	0	0	1
		ccc1	22	8			30		0.733333	0.266667	0	0
		ccc2	20	1			21		0.952381	0.047619	0	0
	150	Wt				31	31		0	0	0	1
		ccc1	1	5	11	14	31		0.0322581	0.16129	0.354839	0.451613
		ccc2	1	12	8		21		0.047619	0.571429	0.380952	0
	300	Wt			1	13	14		0	0	0.0714286	0.928571
		ccc1			2	25	27		0	0	0.0740741	0.925926
		ccc2		1	12	9	22		0	0.0454545	0.545455	0.409091
	450	Wt		1	1	5	7		0	0.142857	0.142857	0.714286
		ccc1			4	17	21		0	0	0.190476	0.809524
		ccc2			4	5	9		0	0	0.444444	0.555556
	600	Wt					0
		ccc1					0
		ccc2					0
Experiment 2			Number						%
			No Collet	1-2 Collet	Incomplete Ring	Complete Ring	Total		No Collet	1-2 Collet	Incomplete Ring	Complete Ring
	0	Wt			3	17	20		0	0	0.15	0.85
		ccc1	14	4			18		0.777778	0.222222	0	0
		ccc2	21	1			22		0.954545	0.0454545	0	0
	150	Wt			1	24	25		0	0	0.04	0.96
		ccc1		7	11	6	24		0	0.291667	0.458333	0.25
		ccc2		10	14	3	27		0	0.37037	0.518519	0.111111
	300	Wt			2	22	24		0	0	0.0833333	0.916667
		ccc1			4	22	26		0	0	0.153846	0.846154
		ccc2		3	12	5	20		0	0.15	0.6	0.25
	450	Wt		1		6	7		0	0.142857	0	0.857143
		ccc1			4	14	18		0	0	0.222222	0.777778
		ccc2			7	13	20		0	0	0.35	0.65
	600	Wt					0
		ccc1					0
		ccc2					0
Experiment 3			Number						%
			No Collet	1-2 Collet	Incomplete Ring	Complete Ring	Total		No Collet	1-2 Collet	Incomplete Ring	Complete Ring
	0	Wt			3	22	25		0	0	0.12	0.88
		ccc1	9	14			23		0.391304	0.608696	0	0
		ccc2	18	7			25		0.72	0.28	0	0
	150	Wt			1	24	25		0	0	0.04	0.96
		ccc1		4	11	10	25		0	0.16	0.44	0.4
		ccc2	2	7	12	4	25		0.08	0.28	0.48	0.16
	300	Wt				24	24		0	0	0	1
		ccc1			4	23	27		0	0	0.148148	0.851852
		ccc2		3	9	12	24		0	0.125	0.375	0.5
	450	Wt				14	14		0	0	0	1
		ccc1			5	18	23		0	0	0.217391	0.782609
		ccc2			7	15	22		0	0	0.318182	0.681818
	600	Wt					0
		ccc1					0
		ccc2					0
