# Supplementary material for: Plant Trans-Golgi Network/Early Endosome pH regulation requires Cation Chloride Cotransporter (CCC1)
Source: eLife. 2022 Jan 6;11:e70701. doi: 10.7554/eLife.70701 (PMC8791640; doi:10.7554/eLife.70701)
Supplement: Figure 5—source data 1. [file elife-70701-fig5-data1.xlsx]

## Sheet: Fig5A
Osmolality cell sap
Wt	292.034		ccc1	251.719		ccc2	270.142
	259.381			253.189			246.794
	260.911			248.954			252.515
	258.42			252.237			260.285
	289.203			254.059			256.011
	296.404			296.769			284.437
	290.935			290.468			289.837
	291.183			273.012			299.912
	279.623			279.135			306.187
	286.459			281.273			291.542
	261.763			263.116			261.824
	278.254			257.253			277.609
	273.182			258.082			261.711
	294.7			288.75
	294.976			263.443

## Sheet: Fig5C
40 cells per root				Wt	100 mM	0	0		200 mM	8	0.2		250 mM	23	0.575		300 mM	37	0.925		400 mM	40	1			ccc	100 mM	0	0		200 mM	9	0.225		250 mM	0	0		300 mM	20	0.5		400 mM	38	0.95
						0	0			13	0.325			32	0.8			39	0.975			40	1					0	0			5	0.125			5	0.125			29	0.725			40	1
						1	0.025			21	0.525			16	0.4			39	0.975			37	0.925					0	0			0	0			30	0.75			40	1			40	1
						0	0			1	0.025			0	0			38	0.95			40	1					2	0.05			35	0.875			0	0			28	0.7			40	1
						0	0			0	0			37	0.925			40	1			39	0.975					0	0			0	0			0	0			39	0.975			36	0.9
						0	0			0	0			32	0.8			38	0.95			37	0.925					0	0			0	0			0	0			36	0.9			39	0.975
						0	0			0	0			40	1			36	0.9			39	0.975					0	0			0	0			5	0.125			1	0.025			40	1
						0	0			2	0.05			40	1			37	0.925			36	0.9					0	0			0	0			2	0.05			36	0.9			36	0.9
						0	0			0	0			22	0.55			39	0.975			39	0.975					0	0			3	0.075			31	0.775			16	0.4			38	0.95
						0	0			0	0			36	0.9			12	0.3			39	0.975					0	0			0	0			23	0.575			36	0.9			37	0.925
						1	0.025			0	0			27	0.675			38	0.95			40	1					0	0			0	0			6	0.15			30	0.75			38	0.95
						0	0			31	0.775			37	0.925			9	0.225									0	0			0	0			10	0.25			38	0.95
						0	0			1	0.025							35	0.875									0	0			0	0							37	0.925
						0	0			0	0							33	0.825									0	0			0	0							40	1
						1	0.025			0	0							40	1									0	0			0	0							6	0.15
						0	0			0	0							35	0.875									0	0			0	0							23	0.575
						0	0			1	0.025							39	0.975									0	0			0	0
						0	0																									0	0
						1	0.025																									3	0.075
																																0	0
																																0	0
																																0	0
																																0	0

## Sheet: Fig5E
Line	Treat	Ratio
Wt	Untreated	0.954101
Wt	Untreated	1.21898
Wt	Untreated	0.912639
Wt	Untreated	0.924953
Wt	Untreated	0.967727
Wt	Untreated	1.12315
Wt	Untreated	0.930343
Wt	Untreated	0.874483
Wt	Untreated	0.71174
Wt	Untreated	0.911248
Wt	Untreated	1.13296
Wt	Untreated	1.29033
Wt	Untreated	0.7302
Wt	Untreated	0.871972
Wt	Untreated	0.798711
Wt	Untreated	0.864782
Wt	Untreated	1.11709
Wt	Untreated	1.21396
Wt	Untreated	0.959834
Wt	Untreated	1.17962
Wt	Untreated	1.25677
Wt	Untreated	0.897206
Wt	Untreated	0.828291
Wt	Untreated	1.3289
Wt	Untreated	1.04133
Wt	Untreated	1.25787
Wt	Untreated	1.01336
Wt	Untreated	0.906494
Wt	Untreated	0.756631
Wt	Untreated	0.8947
Wt	Untreated	0.926039
Wt	Untreated	1.03587
Wt	Untreated	1.07526
Wt	Untreated	0.7134
Wt	Untreated	0.705016
Wt	Untreated	0.970597
Wt	Untreated	1.2673
Wt	Untreated	1.20228
Wt	Untreated	1.23383
Wt	NaCl	0.955172
Wt	NaCl	1.01804
Wt	NaCl	0.949645
Wt	NaCl	1.7476
Wt	NaCl	2.19514
Wt	NaCl	1.78949
Wt	NaCl	1.72462
Wt	NaCl	1.66452
Wt	NaCl	1.63127
Wt	NaCl	1.03901
Wt	NaCl	0.743508
Wt	NaCl	0.95993
Wt	NaCl	1.89285
Wt	NaCl	1.97433
Wt	NaCl	1.76531
Wt	NaCl	1.62321
Wt	NaCl	1.69454
Wt	NaCl	1.78073
Wt	NaCl	1.50304
Wt	NaCl	1.92482
Wt	NaCl	1.46204
Wt	NaCl	2.15447
Wt	NaCl	2.34218
Wt	NaCl	2.16784
Wt	NaCl	0.865793
Wt	NaCl	0.9817
Wt	NaCl	1.01854
Wt	NaCl	1.67379
Wt	NaCl	1.80722
Wt	NaCl	1.6937
Wt	NaCl	1.78529
Wt	NaCl	2.41539
Wt	NaCl	1.19333
Wt	Mannitol	1.86718
Wt	Mannitol	1.63646
Wt	Mannitol	1.55035
Wt	Mannitol	1.77698
Wt	Mannitol	1.55719
Wt	Mannitol	1.64859
Wt	Mannitol	2.1945
Wt	Mannitol	1.84383
Wt	Mannitol	2.06003
Wt	Mannitol	2.02922
Wt	Mannitol	2.11056
Wt	Mannitol	1.86504
Wt	Mannitol	1.47624
Wt	Mannitol	1.308
Wt	Mannitol	1.50907
Wt	Mannitol	2.19909
Wt	Mannitol	2.33824
Wt	Mannitol	2.36793
Wt	Mannitol	2.67522
Wt	Mannitol	2.49388
Wt	Mannitol	2.42072
Wt	Mannitol	1.25941
Wt	Mannitol	0.908871
Wt	Mannitol	0.946475
Wt	Mannitol	2.24388
Wt	Mannitol	2.80139
Wt	Mannitol	2.48546
Wt	Mannitol	1.39841
Wt	Mannitol	1.34351
Wt	Mannitol	1.51399
ccc	Untreated	0.77096
ccc	Untreated	0.773705
ccc	Untreated	0.738107
ccc	Untreated	0.761991
ccc	Untreated	0.873939
ccc	Untreated	0.731223
ccc	Untreated	1.02262
ccc	Untreated	0.997654
ccc	Untreated	1.17625
ccc	Untreated	1.00427
ccc	Untreated	0.977691
ccc	Untreated	0.997622
ccc	Untreated	1.00745
ccc	Untreated	0.818502
ccc	Untreated	1.11605
ccc	Untreated	1.17602
ccc	Untreated	1.30926
ccc	Untreated	1.51922
ccc	Untreated	1.26223
ccc	Untreated	1.01907
ccc	Untreated	0.664832
ccc	Untreated	1.05058
ccc	Untreated	0.919422
ccc	Untreated	1.19501
ccc	Untreated	0.955006
ccc	Untreated	1.08454
ccc	Untreated	1.08965
ccc	Untreated	0.792933
ccc	Untreated	0.732214
ccc	Untreated	1.1306
ccc	Untreated	0.410225
ccc	Untreated	0.487194
ccc	Untreated	0.445211
ccc	Untreated	0.985064
ccc	Untreated	0.889382
ccc	Untreated	0.947962
ccc	NaCl	0.709964
ccc	NaCl	0.837644
ccc	NaCl	0.804838
ccc	NaCl	1.55188
ccc	NaCl	1.24812
ccc	NaCl	1.21583
ccc	NaCl	1.57367
ccc	NaCl	1.49778
ccc	NaCl	1.38282
ccc	NaCl	0.620657
ccc	NaCl	0.749358
ccc	NaCl	0.880675
ccc	NaCl	1.75331
ccc	NaCl	2.08396
ccc	NaCl	1.75539
ccc	NaCl	1.77195
ccc	NaCl	1.79458
ccc	NaCl	1.90677
ccc	NaCl	0.902439
ccc	NaCl	0.935911
ccc	NaCl	0.869112
ccc	NaCl	1.23789
ccc	NaCl	1.20247
ccc	NaCl	1.33068
ccc	NaCl	1.20279
ccc	NaCl	1.54159
ccc	NaCl	1.40975
ccc	NaCl	1.61521
ccc	NaCl	1.58917
ccc	NaCl	1.9102
ccc	NaCl	1.02479
ccc	NaCl	0.964394
ccc	NaCl	1.04084
ccc	NaCl	1.14482
ccc	NaCl	1.03559
ccc	NaCl	0.930252
ccc	Mannitol	1.08977
ccc	Mannitol	1.31845
ccc	Mannitol	1.4846
ccc	Mannitol	1.2022
ccc	Mannitol	1.24072
ccc	Mannitol	0.901507
ccc	Mannitol	0.727426
ccc	Mannitol	0.714587
ccc	Mannitol	0.941921
ccc	Mannitol	1.46555
ccc	Mannitol	1.14198
ccc	Mannitol	1.35698
ccc	Mannitol	1.3442
ccc	Mannitol	1.44624
ccc	Mannitol	1.31741
ccc	Mannitol	1.21703
ccc	Mannitol	1.18898
ccc	Mannitol	1.67948
ccc	Mannitol	1.44304
ccc	Mannitol	1.20002
ccc	Mannitol	0.853957
ccc	Mannitol	1.03669
ccc	Mannitol	1.10287
ccc	Mannitol	1.0381
ccc	Mannitol	1.10742
ccc	Mannitol	0.959315
ccc	Mannitol	1.11587
ccc	Mannitol	1.54954
ccc	Mannitol	1.29885
ccc	Mannitol	0.824624
ccc	Mannitol	1.36639
ccc	Mannitol	1.10345
ccc	Mannitol	1.48507
ccc	Mannitol	0.955351
ccc	Mannitol	1.08424
ccc	Mannitol	1.05363
