# Supplementary material for: Plant Trans-Golgi Network/Early Endosome pH regulation requires Cation Chloride Cotransporter (CCC1)
Source: eLife. 2022 Jan 6;11:e70701. doi: 10.7554/eLife.70701 (PMC8791640; doi:10.7554/eLife.70701)
Supplement: Figure 6—source data 1. [file elife-70701-fig6-data1.xlsx]

## Sheet: Fig6B
Line	Treat	Ratio
Wt	Untreated	1.36059
Wt	Untreated	1.49687
Wt	Untreated	1.08943
Wt	Untreated	0.911376
Wt	Untreated	1.10077
Wt	Untreated	0.589117
Wt	Untreated	0.904249
Wt	Untreated	0.862838
Wt	Untreated	0.722549
Wt	Untreated	0.827892
Wt	Untreated	0.880941
Wt	Untreated	0.782295
Wt	Untreated	1.03923
Wt	Untreated	1.01858
Wt	Untreated	0.910425
Wt	Untreated	0.961825
Wt	Untreated	0.958734
Wt	Untreated	1.24979
Wt	Untreated	1.01612
Wt	Untreated	0.90196
Wt	Untreated	0.909998
Wt	Untreated	1.21294
Wt	Untreated	1.25353
Wt	Untreated	1.15982
Wt	Untreated	0.822051
Wt	Untreated	0.945889
Wt	Untreated	1.1102
Wt	Untreated	2.16354
Wt	Untreated	1.89674
Wt	Untreated	1.42519
Wt	Untreated	0.706355
Wt	Untreated	0.539256
Wt	Untreated	0.587242
Wt	Untreated	0.828806
Wt	Untreated	0.762344
Wt	Untreated	1.05789
Wt	Untreated	1.13454
Wt	Untreated	0.687682
Wt	Untreated	0.659193
Wt	Untreated	0.823102
Wt	Untreated	0.73885
Wt	Untreated	0.958896
Wt	Untreated	1.14224
Wt	Untreated	0.879568
Wt	Untreated	1.00855
ccc	Untreated	0.931249
ccc	Untreated	0.792646
ccc	Untreated	0.971959
ccc	Untreated	1.19985
ccc	Untreated	0.967179
ccc	Untreated	1.01621
ccc	Untreated	1.00164
ccc	Untreated	0.84972
ccc	Untreated	1.23263
ccc	Untreated	1.09316
ccc	Untreated	1.71911
ccc	Untreated	1.19703
ccc	Untreated	1.2785
ccc	Untreated	1.07362
ccc	Untreated	1.20233
ccc	Untreated	0.73763
ccc	Untreated	0.984319
ccc	Untreated	0.986129
ccc	Untreated	0.842166
ccc	Untreated	0.670387
ccc	Untreated	0.957561
ccc	Untreated	1.16336
ccc	Untreated	0.864675
ccc	Untreated	0.965473
ccc	Untreated	0.855135
ccc	Untreated	0.816626
ccc	Untreated	0.802558
ccc	Untreated	1.30732
ccc	Untreated	0.853536
ccc	Untreated	0.926652
ccc	Untreated	0.84599
ccc	Untreated	0.862356
ccc	Untreated	1.05324
ccc	Untreated	1.08219
ccc	Untreated	1.55405
ccc	Untreated	1.26922
ccc	Untreated	1.2387
ccc	Untreated	1.04702
ccc	Untreated	1.35962
Wt	BFA	1.01335
Wt	BFA	0.979603
Wt	BFA	1.05627
Wt	BFA	1.04753
Wt	BFA	1.45282
Wt	BFA	1.699
Wt	BFA	2.16921
Wt	BFA	2.24183
Wt	BFA	1.2283
Wt	BFA	1.75692
Wt	BFA	1.95745
Wt	BFA	1.37899
Wt	BFA	1.41031
Wt	BFA	1.11057
Wt	BFA	1.47533
Wt	BFA	1.72673
Wt	BFA	1.7229
Wt	BFA	2.25855
Wt	BFA	1.5433
Wt	BFA	1.43798
Wt	BFA	1.92481
Wt	BFA	2.27706
Wt	BFA	2.31206
Wt	BFA	1.80766
Wt	BFA	1.17461
Wt	BFA	1.38451
Wt	BFA	1.02286
Wt	BFA	0.76701
Wt	BFA	0.824441
Wt	BFA	1.25966
Wt	BFA	1.20667
Wt	BFA	1.52907
Wt	BFA	1.13705
Wt	BFA	1.0789
Wt	BFA	1.21882
Wt	BFA	1.04405
Wt	BFA	0.888123
Wt	BFA	1.90999
Wt	BFA	0.798139
Wt	BFA	2.3796
Wt	BFA	1.84605
Wt	BFA	2.50287
Wt	BFA	0.907717
Wt	BFA	1.00519
Wt	BFA	1.072
ccc	BFA	3.06581
ccc	BFA	2.03471
ccc	BFA	1.47827
ccc	BFA	1.6636
ccc	BFA	1.56778
ccc	BFA	1.21529
ccc	BFA	1.98159
ccc	BFA	1.30786
ccc	BFA	1.67882
ccc	BFA	1.5512
ccc	BFA	1.1505
ccc	BFA	1.97021
ccc	BFA	2.36088
ccc	BFA	2.03696
ccc	BFA	1.7394
ccc	BFA	1.49609
ccc	BFA	1.91001
ccc	BFA	1.71098
ccc	BFA	1.9399
ccc	BFA	2.17558
ccc	BFA	2.6607
ccc	BFA	1.42526
ccc	BFA	2.42161
ccc	BFA	1.68386
Wt	Washout	1.16565
Wt	Washout	1.7096
Wt	Washout	1.15314
Wt	Washout	1.01429
Wt	Washout	0.726665
Wt	Washout	0.869642
Wt	Washout	1.0887
Wt	Washout	1.30398
Wt	Washout	0.956375
Wt	Washout	1.22577
Wt	Washout	1.28594
Wt	Washout	0.875225
Wt	Washout	1.13016
Wt	Washout	1.40503
Wt	Washout	0.684771
Wt	Washout	1.04191
Wt	Washout	0.868576
Wt	Washout	0.969471
Wt	Washout	0.985928
Wt	Washout	0.997776
Wt	Washout	0.676289
Wt	Washout	0.840177
Wt	Washout	0.680383
Wt	Washout	0.621224
Wt	Washout	1.29543
Wt	Washout	1.47727
Wt	Washout	1.25501
Wt	Washout	0.647875
Wt	Washout	0.654702
Wt	Washout	0.654044
Wt	Washout	0.993572
Wt	Washout	1.42343
Wt	Washout	0.999825
Wt	Washout	0.767668
Wt	Washout	0.915413
Wt	Washout	0.707596
Wt	Washout	0.828209
Wt	Washout	0.986501
Wt	Washout	0.759052
Wt	Washout	1.11943
Wt	Washout	1.25225
Wt	Washout	1.22157
ccc	Washout	1.58781
ccc	Washout	1.33719
ccc	Washout	1.25233
ccc	Washout	1.63968
ccc	Washout	1.54841
ccc	Washout	1.43167
ccc	Washout	1.78149
ccc	Washout	1.76537
ccc	Washout	1.83225
ccc	Washout	1.27919
ccc	Washout	1.14258
ccc	Washout	1.68261
ccc	Washout	1.56663
ccc	Washout	2.04217
ccc	Washout	1.33324
ccc	Washout	0.993161
ccc	Washout	1.00297
ccc	Washout	0.794961
ccc	Washout	1.15806
ccc	Washout	1.04693
ccc	Washout	1.17829
ccc	Washout	0.866765
ccc	Washout	1.35047
ccc	Washout	1.04333
ccc	Washout	1.94917
ccc	Washout	1.62852
ccc	Washout	1.6575
ccc	Washout	2.26646
ccc	Washout	1.87241
ccc	Washout	2.24605

## Sheet: Fig6D
Line	Time	Ratio
Wt	10	1.23997
Wt	10	1.15931
Wt	10	1.3826
Wt	10	1.02739
Wt	10	1.16334
Wt	10	1.01679
Wt	10	1.02402
Wt	10	1.34557
Wt	10	1.11256
Wt	10	0.925942
Wt	10	1.08296
Wt	10	0.708603
Wt	10	0.801703
Wt	10	0.696394
Wt	10	0.885489
Wt	10	0.787666
Wt	10	0.834194
Wt	10	0.7511
Wt	10	1.09176
Wt	10	1.1908
Wt	10	0.955722
Wt	10	1.11555
Wt	10	0.903245
Wt	10	1.11879
Wt	10	0.920305
Wt	10	0.928637
Wt	10	0.80962
Wt	10	0.856879
Wt	10	0.755466
Wt	10	0.864668
Wt	10	0.952478
Wt	10	0.892871
Wt	10	0.87792
Wt	10	0.975455
Wt	10	0.941634
Wt	10	1.02574
Wt	10	0.825522
Wt	10	0.918
Wt	10	0.954885
Wt	10	0.92509
Wt	10	0.89949
Wt	10	0.81789
Wt	10	0.826388
Wt	10	1.16762
Wt	10	1.00339
Wt	10	1.06582
Wt	10	1.01634
Wt	10	1.23479
Wt	10	0.999546
Wt	10	1.35963
Wt	10	1.28973
Wt	10	1.24837
Wt	10	1.15196
Wt	10	1.17239
ccc1	10	0.990279
ccc1	10	0.855829
ccc1	10	0.605238
ccc1	10	0.658526
ccc1	10	0.693088
ccc1	10	0.687761
ccc1	10	0.797274
ccc1	10	1.08127
ccc1	10	1.08165
ccc1	10	1.02798
ccc1	10	0.991897
ccc1	10	1.20785
ccc1	10	0.905087
ccc1	10	0.858047
ccc1	10	0.822072
ccc1	10	0.72451
ccc2	10	0.909884
ccc2	10	0.885723
ccc2	10	1.05197
ccc2	10	0.970998
ccc2	10	1.0664
ccc2	10	1.02004
ccc2	10	1.17864
ccc2	10	0.857436
ccc2	10	0.93655
ccc2	10	0.819908
ccc2	10	1.1164
ccc2	10	0.921316
ccc2	10	0.842132
ccc2	10	0.871577
ccc2	10	0.920714
ccc2	10	1.10289
ccc2	10	1.0324
ccc2	10	1.02252
ccc2	10	0.797655
ccc2	10	0.857233
ccc2	10	0.696297
ccc2	10	0.730464
ccc2	10	0.786376
ccc2	10	0.785391
ccc2	10	0.787369
ccc2	10	0.67943
ccc2	10	0.768816
ccc2	10	0.930034
ccc2	10	0.953767
ccc2	10	0.953496
ccc2	10	1.02076
ccc2	10	0.975357
ccc2	10	1.11324
Wt	60	1.89805
Wt	60	1.70384
Wt	60	2.39069
Wt	60	2.76939
Wt	60	3.11823
Wt	60	2.73782
Wt	60	7.21253
Wt	60	5.50484
Wt	60	5.47197
Wt	60	4.17806
Wt	60	3.86785
Wt	60	3.85868
Wt	60	3.94392
Wt	60	3.92622
Wt	60	4.32049
Wt	60	3.63283
Wt	60	5.05931
Wt	60	3.67733
Wt	60	4.02433
Wt	60	4.05613
Wt	60	5.15937
Wt	60	4.09635
Wt	60	3.54468
Wt	60	4.31462
Wt	60	9.79646
Wt	60	6.05929
Wt	60	5.9042
Wt	60	6.95584
Wt	60	6.12095
Wt	60	2.84521
Wt	60	2.27272
Wt	60	1.96611
Wt	60	1.4956
Wt	60	2.87346
Wt	60	3.33437
Wt	60	3.22598
Wt	60	3.35983
Wt	60	3.38512
Wt	60	3.96641
Wt	60	3.9496
Wt	60	3.88318
Wt	60	3.16884
Wt	60	3.37986
Wt	60	2.25344
Wt	60	3.92397
Wt	60	4.03515
Wt	60	5.59821
Wt	60	5.30276
Wt	60	3.80982
Wt	60	7.3821
Wt	60	7.44509
Wt	60	7.53162
Wt	60	6.19859
Wt	60	7.23497
Wt	60	8.33816
Wt	60	8.93976
Wt	60	9.3079
Wt	60	7.08526
Wt	60	8.57103
Wt	60	7.36249
Wt	60	5.44505
Wt	60	10.118
Wt	60	9.45968
Wt	60	13.0693
Wt	60	14.2844
Wt	60	10.6378
Wt	60	6.75471
Wt	60	7.58095
Wt	60	6.70644
Wt	60	7.94023
Wt	60	8.34024
Wt	60	9.38074
Wt	60	10.3488
Wt	60	10.4491
Wt	60	8.43404
Wt	60	9.48338
ccc1	60	2.47327
ccc1	60	2.91668
ccc1	60	2.75681
ccc1	60	2.63299
ccc1	60	2.97354
ccc1	60	3.45563
ccc1	60	3.09889
ccc1	60	2.69991
ccc1	60	2.88328
ccc1	60	3.16992
ccc1	60	1.86027
ccc1	60	2.05007
ccc1	60	2.36095
ccc1	60	2.61244
ccc1	60	2.0218
ccc1	60	2.1836
ccc1	60	1.98144
ccc1	60	2.22124
ccc1	60	4.29544
ccc1	60	2.69667
ccc1	60	3.07848
ccc1	60	3.85974
ccc1	60	4.65668
ccc1	60	2.27675
ccc1	60	2.27704
ccc1	60	2.40159
ccc1	60	2.4875
ccc1	60	2.03675
ccc1	60	2.31967
ccc1	60	1.85174
ccc1	60	2.17732
ccc1	60	2.70604
ccc1	60	2.42429
ccc1	60	2.7961
ccc1	60	2.78582
ccc1	60	2.74559
ccc1	60	3.30919
ccc1	60	2.9073
ccc1	60	4.50367
ccc1	60	3.31526
ccc1	60	3.27469
ccc1	60	3.61859
ccc1	60	4.19383
ccc1	60	4.13998
ccc1	60	4.56996
ccc1	60	4.1832
ccc1	60	3.97023
ccc1	60	4.77195
ccc1	60	3.9685
ccc1	60	5.34162
ccc1	60	5.55384
ccc1	60	5.15341
ccc1	60	5.30495
ccc1	60	4.82074
ccc1	60	4.78703
ccc1	60	4.74822
ccc2	60	2.93488
ccc2	60	2.64131
ccc2	60	2.83184
ccc2	60	2.25365
ccc2	60	3.47843
ccc2	60	3.01265
ccc2	60	2.56151
ccc2	60	2.99715
ccc2	60	3.04939
ccc2	60	4.17164
ccc2	60	2.80637
ccc2	60	3.75768
ccc2	60	3.5453
ccc2	60	4.30361
ccc2	60	2.42755
ccc2	60	2.31043
ccc2	60	2.94351
ccc2	60	4.41432
ccc2	60	3.51241
ccc2	60	3.75606
ccc2	60	3.24634
ccc2	60	3.23087
ccc2	60	3.39541
ccc2	60	3.02319
ccc2	60	2.96977
ccc2	60	2.95772
ccc2	60	4.32313
ccc2	60	4.72527
ccc2	60	5.83816
ccc2	60	3.99068
ccc2	60	5.36548
ccc2	60	4.60384
ccc2	60	4.85827
ccc2	60	4.6849
ccc2	60	4.30746
ccc2	60	2.24881
ccc2	60	2.41857
ccc2	60	2.73494
ccc2	60	3.31704
ccc2	60	3.36791
ccc2	60	1.99559
ccc2	60	2.4401
ccc2	60	2.20128
ccc2	60	2.90141
ccc2	60	2.6929
ccc2	60	2.56534
ccc2	60	2.95944
ccc2	60	2.50153
ccc2	60	3.13431
ccc2	60	3.00558
ccc2	60	3.08997
ccc2	60	2.66877
ccc2	60	2.83695
ccc2	60	2.47239
ccc2	60	2.95002
ccc2	60	3.08022
ccc2	60	2.77465
ccc2	60	2.65378
ccc2	60	2.79264
ccc2	60	3.43666
ccc2	60	3.44232
ccc2	60	2.75468
ccc2	60	2.67876
ccc2	60	2.85513
ccc2	60	2.67704
ccc2	60	2.84669
ccc2	60	2.88469
ccc2	60	2.71118
ccc2	60	2.67381
ccc2	60	4.51548
ccc2	60	4.71356
ccc2	60	4.37748
ccc2	60	3.17873
ccc2	60	2.9306
ccc2	60	2.74663
ccc2	60	3.3637
ccc2	60	3.0344
ccc2	60	3.33524
ccc2	60	3.19427
ccc2	60	3.05742
ccc2	60	3.41975
ccc2	60	4.17028
ccc2	60	4.32291
ccc2	60	3.94058
ccc2	60	4.21139
ccc2	60	3.92103
ccc2	60	4.3098
ccc2	60	4.41558
ccc2	60	4.50148
Wt	0	0.832089
Wt	0	0.909016
Wt	0	0.865975
Wt	0	0.856032
Wt	0	0.830673
Wt	0	0.927172
Wt	0	0.947217
Wt	0	1.03409
Wt	0	1.00442
Wt	0	1.0263
Wt	0	0.914869
Wt	0	1.00444
Wt	0	0.955496
Wt	0	0.910465
Wt	0	0.847799
Wt	0	0.773742
Wt	0	0.829208
Wt	0	0.915106
Wt	0	0.866311
Wt	0	0.882912
Wt	0	0.912899
Wt	0	0.8098
Wt	0	0.789074
Wt	0	0.616987
Wt	0	0.69753
Wt	0	0.696885
Wt	0	0.722184
Wt	0	0.700761
Wt	0	0.83506
Wt	0	0.936572
Wt	0	0.824628
Wt	0	0.83765
Wt	0	0.786702
Wt	0	0.725929
Wt	0	0.704071
Wt	0	0.7831
Wt	0	0.727283
Wt	0	0.875937
Wt	0	0.747069
Wt	0	0.750741
Wt	0	0.655714
Wt	0	0.73328
Wt	0	0.765442
Wt	0	0.842128
Wt	0	0.802957
Wt	0	0.908588
Wt	0	0.980657
Wt	0	0.919304
Wt	0	0.839466
Wt	0	0.872523
Wt	0	0.888176
Wt	0	0.824571
Wt	0	1.08212
Wt	0	1.18359
Wt	0	0.893104
Wt	0	0.764612
Wt	0	0.708528
Wt	0	0.705276
Wt	0	0.643523
Wt	0	0.924363
Wt	0	0.891633
Wt	0	0.832842
Wt	0	0.860452
Wt	0	1.18455
Wt	0	1.10402
Wt	0	1.03299
Wt	0	1.03337
Wt	0	1.02521
Wt	0	1.07217
Wt	0	0.911735
Wt	0	1.48579
Wt	0	1.19653
Wt	0	1.05974
Wt	0	0.885461
Wt	0	0.944518
Wt	0	1.04041
Wt	0	0.806988
Wt	0	0.839812
Wt	0	0.832053
Wt	0	0.855111
Wt	0	0.846998
Wt	0	0.915375
Wt	0	0.892717
Wt	0	0.896331
Wt	0	0.88416
Wt	0	0.662838
Wt	0	0.618024
Wt	0	1.05646
Wt	0	1.13153
Wt	0	1.0113
Wt	0	0.851229
Wt	0	0.820056
Wt	0	0.833032
Wt	0	0.835543
Wt	0	0.844042
Wt	0	0.982069
Wt	0	1.12107
Wt	0	1.09184
Wt	0	0.999222
Wt	0	1.12327
Wt	0	0.943359
Wt	0	0.978989
Wt	0	1.05375
Wt	0	0.88154
Wt	0	0.990062
Wt	0	0.887181
Wt	0	0.907622
Wt	0	1.04467
Wt	0	1.09584
Wt	0	0.976801
Wt	0	1.06888
Wt	0	0.972858
Wt	0	0.955322
Wt	0	0.819957
Wt	0	0.677827
Wt	0	0.682609
Wt	0	0.508968
Wt	0	0.582878
Wt	0	0.629125
Wt	0	0.585604
Wt	0	0.677199
Wt	0	0.711484
Wt	0	0.698943
Wt	0	0.663029
Wt	0	0.567868
Wt	0	0.573972
Wt	0	0.751522
Wt	0	0.820421
Wt	0	0.937764
Wt	0	1.02893
Wt	0	1.12887
Wt	0	1.12539
Wt	0	0.916002
Wt	0	0.697113
Wt	0	0.748878
Wt	0	1.01675
Wt	0	1.14859
Wt	0	1.01582
Wt	0	0.975268
Wt	0	0.954111
Wt	0	0.958177
Wt	0	0.984777
Wt	0	1.7566
Wt	0	1.56429
Wt	0	1.59949
Wt	0	1.65219
Wt	0	1.44653
Wt	0	1.56265
Wt	0	1.45691
Wt	0	1.46368
Wt	0	1.47127
Wt	0	1.43042
Wt	0	1.58938
Wt	0	1.44693
Wt	0	1.38537
Wt	0	1.37443
Wt	0	1.34249
Wt	0	1.85958
Wt	0	1.6683
Wt	0	1.79987
Wt	0	1.68512
Wt	0	1.56841
Wt	0	1.25285
Wt	0	1.21075
Wt	0	1.5069
Wt	0	1.38708
Wt	0	1.52122
Wt	0	1.60035
Wt	0	1.23719
Wt	0	1.18336
Wt	0	1.02806
Wt	0	1.00918
Wt	0	0.991695
Wt	0	0.938405
Wt	0	0.938289
Wt	0	1.03612
Wt	0	1.03517
Wt	0	1.063
Wt	0	1.14389
Wt	0	0.868831
Wt	0	1.33505
Wt	0	1.40948
Wt	0	1.50724
Wt	0	1.46987
Wt	0	1.48612
Wt	0	1.3372
Wt	0	1.59078
Wt	0	1.47192
Wt	0	1.45937
Wt	0	1.40124
Wt	0	1.19933
Wt	0	1.34278
Wt	0	1.39347
Wt	0	1.32794
Wt	0	0.87843
Wt	0	0.983756
Wt	0	0.878977
Wt	0	0.840634
Wt	0	0.916153
Wt	0	0.728988
Wt	0	0.765621
Wt	0	0.774121
Wt	0	0.814988
Wt	0	0.853066
Wt	0	0.959654
Wt	0	0.879374
Wt	0	0.901139
Wt	0	0.998644
Wt	0	0.892847
Wt	0	0.870743
Wt	0	0.830102
Wt	0	0.823951
Wt	0	0.824904
Wt	0	0.792256
Wt	0	0.898026
Wt	0	0.876258
ccc1	0	1.0843
ccc1	0	0.933408
ccc1	0	0.918792
ccc1	0	0.934724
ccc1	0	0.911218
ccc1	0	0.99315
ccc1	0	0.885553
ccc1	0	0.776943
ccc1	0	0.775103
ccc1	0	1.09076
ccc1	0	1.10386
ccc1	0	1.00024
ccc1	0	0.868007
ccc1	0	1.00996
ccc1	0	0.933895
ccc1	0	0.889012
ccc1	0	1.59369
ccc1	0	1.24719
ccc1	0	0.89617
ccc1	0	0.683332
ccc1	0	0.59013
ccc1	0	1.09125
ccc1	0	0.959903
ccc1	0	0.892174
ccc1	0	0.719833
ccc1	0	0.545771
ccc1	0	0.833315
ccc1	0	0.825105
ccc1	0	0.857432
ccc1	0	0.735525
ccc1	0	0.940424
ccc1	0	0.863591
ccc1	0	0.980767
ccc1	0	0.862208
ccc1	0	0.654255
ccc1	0	0.743134
ccc1	0	0.69334
ccc1	0	0.838486
ccc1	0	1.0926
ccc1	0	1.00898
ccc1	0	0.953735
ccc1	0	1.06133
ccc1	0	1.22486
ccc1	0	1.20148
ccc1	0	1.19965
ccc1	0	1.31858
ccc1	0	1.30643
ccc1	0	1.30617
ccc1	0	1.25444
ccc1	0	1.08693
ccc1	0	0.992882
ccc1	0	0.868236
ccc1	0	0.981005
ccc1	0	0.979694
ccc1	0	0.839299
ccc1	0	0.938124
ccc1	0	1.03138
ccc1	0	0.880426
ccc1	0	0.927558
ccc1	0	0.850401
ccc1	0	0.829578
ccc1	0	0.85221
ccc1	0	0.816512
ccc1	0	0.740851
ccc1	0	0.838476
ccc1	0	0.89748
ccc1	0	0.737506
ccc1	0	0.953858
ccc1	0	0.976488
ccc1	0	0.859468
ccc1	0	0.908391
ccc1	0	1.00008
ccc1	0	0.982896
ccc1	0	1.00667
ccc1	0	1.09723
ccc1	0	1.09552
ccc1	0	0.932049
ccc1	0	0.930475
ccc1	0	0.983518
ccc1	0	1.08796
ccc1	0	1.09694
ccc1	0	0.873347
ccc1	0	0.801322
ccc1	0	0.814721
ccc1	0	0.793014
ccc1	0	0.663586
ccc1	0	0.683423
ccc1	0	0.792357
ccc1	0	0.860265
ccc1	0	1.03618
ccc1	0	1.10106
ccc1	0	0.95007
ccc1	0	0.957936
ccc1	0	0.968832
ccc1	0	1.0522
ccc1	0	1.10269
ccc1	0	1.09202
ccc1	0	0.994633
ccc1	0	1.08344
ccc1	0	0.992257
ccc1	0	0.885441
ccc1	0	0.89244
ccc1	0	0.844015
ccc2	0	0.52447
ccc2	0	0.578961
ccc2	0	0.620364
ccc2	0	0.676046
ccc2	0	0.930148
ccc2	0	0.935008
ccc2	0	0.854778
ccc2	0	0.882026
ccc2	0	0.579932
ccc2	0	0.375558
ccc2	0	0.478885
ccc2	0	0.433546
ccc2	0	0.388035
ccc2	0	0.765706
ccc2	0	0.775844
ccc2	0	0.794582
ccc2	0	0.953497
ccc2	0	0.720208
ccc2	0	0.740532
ccc2	0	0.711988
ccc2	0	0.826164
ccc2	0	0.820397
ccc2	0	0.724527
ccc2	0	0.71448
ccc2	0	0.780619
ccc2	0	0.77583
ccc2	0	0.770884
ccc2	0	0.836846
ccc2	0	0.626286
ccc2	0	0.505342
ccc2	0	0.648164
ccc2	0	0.571841
ccc2	0	0.504415
ccc2	0	0.613167
ccc2	0	0.670672
ccc2	0	0.638625
ccc2	0	0.625867
ccc2	0	0.73605
ccc2	0	0.655245
ccc2	0	0.617508
ccc2	0	0.578242
ccc2	0	0.559549
ccc2	0	0.749552
ccc2	0	0.852933
ccc2	0	0.91403
ccc2	0	0.853966
ccc2	0	0.992185
ccc2	0	0.947299
ccc2	0	1.06264
ccc2	0	0.853613
ccc2	0	0.948167
ccc2	0	0.846153
ccc2	0	0.937466
ccc2	0	0.772794
ccc2	0	0.908684
ccc2	0	0.748918
ccc2	0	1.03512
ccc2	0	0.986455
ccc2	0	1.13954
ccc2	0	1.13235
ccc2	0	1.2866
ccc2	0	1.20795
ccc2	0	0.909179
ccc2	0	1.01798
ccc2	0	1.02661
ccc2	0	1.06484
ccc2	0	1.25316
ccc2	0	0.817064
ccc2	0	0.755496
ccc2	0	0.76777
ccc2	0	0.941807
ccc2	0	0.961767
ccc2	0	0.894101
ccc2	0	0.963919
ccc2	0	1.03329
ccc2	0	1.02815
ccc2	0	1.02591
ccc2	0	0.976373
ccc2	0	0.71441
ccc2	0	0.639562
ccc2	0	0.928578
ccc2	0	0.880938
ccc2	0	0.797479
ccc2	0	0.809521
ccc2	0	0.742359
ccc2	0	1.03332
ccc2	0	1.16325
ccc2	0	1.24644
ccc2	0	1.14445
ccc2	0	1.15226
ccc2	0	1.08462
ccc2	0	0.983313
ccc2	0	1.08069
ccc2	0	1.05146
ccc2	0	1.00825
ccc2	0	1.07893
ccc2	0	1.25571
ccc2	0	1.06703
ccc2	0	1.05067
ccc2	0	1.50689
ccc2	0	1.258
ccc2	0	1.21337
ccc2	0	1.1055
ccc2	0	1.2682
ccc2	0	1.13168
ccc2	0	1.08597
ccc2	0	1.19605
ccc2	0	1.29359
ccc2	0	1.21895
ccc2	0	0.91705
ccc2	0	0.83755
ccc2	0	0.886613
ccc2	0	0.908368
ccc2	0	0.919216
ccc2	0	0.955156
ccc2	0	0.714691
ccc2	0	0.962256
ccc2	0	0.887074
ccc2	0	0.977439
ccc2	0	1.02964
ccc2	0	0.813484
ccc2	0	0.815621
ccc2	0	1.03603
ccc2	0	0.967843
ccc2	0	1.01589
ccc2	0	0.935037
ccc2	0	0.92523
ccc2	0	0.975419
ccc2	0	1.01236
ccc2	0	1.05766
ccc2	0	1.0836
ccc2	0	1.0237
ccc2	0	1.05778
ccc2	0	1.04115
ccc2	0	0.987299
ccc2	0	1.01855
ccc2	0	1.09186
ccc2	0	1.15827
ccc2	0	0.936493
ccc2	0	1.08909
ccc2	0	0.988037
ccc2	0	1.10724
ccc2	0	1.02043
ccc2	0	1.18142
ccc2	0	1.08081
ccc2	0	1.03143
ccc2	0	0.942457
ccc2	0	0.97235
ccc2	0	1.08042
ccc2	0	1.23251
ccc2	0	1.08883
ccc2	0	1.08126
ccc2	0	1.13085

## Sheet: Fig6F
Line	Ratio
Wt	0.814671
Wt	0.87448
Wt	0.710477
Wt	1.19618
Wt	0.983157
Wt	1.12414
Wt	0.711151
Wt	0.645987
Wt	0.865591
Wt	1.20282
Wt	1.1341
Wt	1.20191
Wt	1.14792
Wt	0.873596
Wt	1.06136
Wt	0.866761
Wt	1.10073
Wt	0.810845
Wt	1.07841
Wt	0.99554
Wt	1.19578
Wt	1.11558
Wt	1.16526
Wt	1.12355
Wt	1.18413
Wt	0.873642
Wt	1.20007
Wt	1.05119
Wt	0.631802
Wt	0.893913
Wt	1.06385
Wt	0.740209
Wt	0.694402
Wt	0.746064
Wt	0.62012
Wt	0.553343
Wt	0.75727
Wt	0.816885
Wt	0.816966
Wt	1.11311
Wt	1.10791
Wt	1.12834
Wt	0.923364
Wt	1.20999
Wt	1.27565
Wt	1.32906
Wt	1.5061
Wt	1.50065
Wt	1.04115
Wt	1.10177
Wt	1.11904
ccc1	0.912645
ccc1	0.818123
ccc1	0.819688
ccc1	0.75721
ccc1	0.857497
ccc1	0.787208
ccc1	1.03818
ccc1	0.985702
ccc1	0.704498
ccc1	0.571639
ccc1	0.558485
ccc1	0.613942
ccc1	0.751353
ccc1	0.778664
ccc1	0.882417
ccc1	0.719467
ccc1	0.684706
ccc1	0.580397
ccc1	0.699176
ccc1	0.903358
ccc1	0.714552
ccc1	1.12111
ccc1	0.498125
ccc1	0.763216
ccc1	0.671295
ccc1	0.874033
ccc1	0.690648
ccc1	0.524637
ccc1	0.587096
ccc1	0.381149
ccc1	0.460589
ccc1	0.492739
ccc1	0.425341
ccc1	0.574454
ccc1	0.521199
ccc1	0.379289
ccc1	0.546116
ccc1	0.671413
ccc1	0.50971
ccc1	0.904694
ccc1	0.831608
ccc1	0.563637
ccc1	0.608344
ccc1	0.809785
ccc1	0.678679
ccc1	0.813486
ccc1	0.746227
ccc1	0.849373
ccc1	0.767246
ccc1	0.715082
ccc1	0.638746
ccc1	1.01376
ccc1	0.925919
ccc1	1.08042
ccc1	1.31503
ccc1	1.12303
ccc1	0.87317
ccc1	0.89829
ccc1	0.91115
ccc1	0.971321
ccc1	1.0062
ccc1	0.816745
ccc1	0.821606
ccc2	0.84622
ccc2	0.810071
ccc2	1.11642
ccc2	0.805888
ccc2	0.611806
ccc2	0.679049
ccc2	1.07113
ccc2	0.960745
ccc2	0.911692
ccc2	0.89595
ccc2	1.06251
ccc2	1.0677
ccc2	0.837099
ccc2	0.883173
ccc2	0.827403
ccc2	0.655426
ccc2	0.767804
ccc2	0.782787
ccc2	0.954152
ccc2	0.635758
ccc2	0.645416
ccc2	0.906664
ccc2	0.975002
ccc2	0.665333
ccc2	0.521316
ccc2	0.517741
ccc2	0.695955
ccc2	0.862225
ccc2	0.6371
ccc2	0.771827
ccc2	0.664024
ccc2	0.5709
ccc2	0.571478
ccc2	0.653816
ccc2	0.812769
ccc2	0.840235
ccc2	0.603335
ccc2	0.630404
ccc2	0.829049
ccc2	0.857551
ccc2	0.869138
ccc2	0.960724
ccc2	0.848285
ccc2	0.938597
ccc2	1.01618
ccc2	0.912692
ccc2	0.872698
ccc2	0.791023
ccc2	1.16944
ccc2	1.14421
ccc2	1.63228

## Sheet: Fig6Sup1A
Line	Treat	Intense
Wt	Untreated	3765.44
Wt	Untreated	3077.59
Wt	Untreated	3199.55
Wt	Untreated	3543.95
Wt	Untreated	2773.11
Wt	Untreated	3515.08
Wt	Untreated	3014.1
Wt	Untreated	3403.64
Wt	Untreated	3560.86
Wt	Untreated	2765.14
Wt	Untreated	2738.79
Wt	Untreated	2630.11
Wt	Untreated	2730.4
Wt	Untreated	2875.38
Wt	Untreated	2354.34
Wt	Untreated	3042.11
Wt	Untreated	3098.26
Wt	Untreated	2833.34
Wt	Untreated	3367.74
Wt	Untreated	3311.81
Wt	Untreated	2509.92
Wt	Untreated	3246.4
Wt	Untreated	2937.3
Wt	Untreated	3287.62
Wt	Untreated	2880.51
Wt	Untreated	2428.13
Wt	Untreated	2066.68
Wt	Untreated	635.662
Wt	Untreated	642.488
Wt	Untreated	772.018
Wt	Untreated	3312.35
Wt	Untreated	3115
Wt	Untreated	3028.66
Wt	Untreated	1666.81
Wt	Untreated	1653.8
Wt	Untreated	1762.51
Wt	Untreated	3232.91
Wt	Untreated	3668.73
Wt	Untreated	2865.23
Wt	Untreated	3360.05
Wt	Untreated	2784.33
Wt	Untreated	3502.8
Wt	Untreated	3057.17
Wt	Untreated	3413.28
Wt	Untreated	3269.02
ccc	Untreated	2464.82
ccc	Untreated	2943.96
ccc	Untreated	2097.42
ccc	Untreated	2517.05
ccc	Untreated	2506.49
ccc	Untreated	2480.74
ccc	Untreated	2503.28
ccc	Untreated	2794.09
ccc	Untreated	1788.51
ccc	Untreated	1099.5
ccc	Untreated	823.927
ccc	Untreated	1269.38
ccc	Untreated	2670.1
ccc	Untreated	2780.62
ccc	Untreated	2651.04
ccc	Untreated	2749.2
ccc	Untreated	1849.59
ccc	Untreated	1950.96
ccc	Untreated	3800.09
ccc	Untreated	3797.85
ccc	Untreated	2764.79
ccc	Untreated	2898.64
ccc	Untreated	2877.44
ccc	Untreated	2664.17
ccc	Untreated	2455.22
ccc	Untreated	2115.29
ccc	Untreated	2770.79
ccc	Untreated	2681.66
ccc	Untreated	2950.43
ccc	Untreated	3480.29
ccc	Untreated	2898.09
ccc	Untreated	2744.08
ccc	Untreated	2265.39
ccc	Untreated	2270.69
ccc	Untreated	1673.2
ccc	Untreated	1823.74
ccc	Untreated	2460.08
ccc	Untreated	2563.24
ccc	Untreated	2152.97
Wt	BFA	2231.2
Wt	BFA	2568.84
Wt	BFA	2203.22
Wt	BFA	3286.48
Wt	BFA	3037.38
Wt	BFA	2684.69
Wt	BFA	1659.93
Wt	BFA	1461.56
Wt	BFA	1939.82
Wt	BFA	2160.09
Wt	BFA	1800.27
Wt	BFA	2673.7
Wt	BFA	2696.07
Wt	BFA	2597.03
Wt	BFA	1917.18
Wt	BFA	1709.21
Wt	BFA	1543.54
Wt	BFA	1728.24
Wt	BFA	2609.97
Wt	BFA	3361.2
Wt	BFA	2548.38
Wt	BFA	1450.6
Wt	BFA	1858.54
Wt	BFA	2392.42
Wt	BFA	1654.08
Wt	BFA	1183.64
Wt	BFA	1688.43
Wt	BFA	2725.7
Wt	BFA	2819.01
Wt	BFA	2479.35
Wt	BFA	2239.04
Wt	BFA	2074.33
Wt	BFA	2666.86
Wt	BFA	1391.04
Wt	BFA	1585.2
Wt	BFA	1779.13
Wt	BFA	2552.66
Wt	BFA	1924.06
Wt	BFA	2589.31
Wt	BFA	2277.98
Wt	BFA	2287.02
Wt	BFA	2304.29
Wt	BFA	1426.69
Wt	BFA	1557.5
Wt	BFA	1551.12
ccc	BFA	1348.94
ccc	BFA	2056.04
ccc	BFA	2388.55
ccc	BFA	2483.72
ccc	BFA	2255.82
ccc	BFA	2438.63
ccc	BFA	1538.87
ccc	BFA	2040.67
ccc	BFA	1695.12
ccc	BFA	1001.14
ccc	BFA	1545.92
ccc	BFA	815.268
ccc	BFA	1160.51
ccc	BFA	999.964
ccc	BFA	1296.56
ccc	BFA	1481.35
ccc	BFA	1524.62
ccc	BFA	1372.12
ccc	BFA	1129.9
ccc	BFA	1260.49
ccc	BFA	1128.93
ccc	BFA	2159.01
ccc	BFA	1857.85
ccc	BFA	2097.14
Wt	Washout	1757.72
Wt	Washout	1033.51
Wt	Washout	1645.75
Wt	Washout	2408.77
Wt	Washout	2519.49
Wt	Washout	2335.74
Wt	Washout	2450.61
Wt	Washout	2009.4
Wt	Washout	2492.5
Wt	Washout	1491.07
Wt	Washout	1502.7
Wt	Washout	2464.21
Wt	Washout	1887.07
Wt	Washout	1390.88
Wt	Washout	1875.24
Wt	Washout	1217.09
Wt	Washout	1444.42
Wt	Washout	1452.76
Wt	Washout	1627.21
Wt	Washout	1250.75
Wt	Washout	1931.57
Wt	Washout	2468.72
Wt	Washout	2361.37
Wt	Washout	3143.73
Wt	Washout	1548.71
Wt	Washout	1326.94
Wt	Washout	1459.86
Wt	Washout	2275.4
Wt	Washout	2222.17
Wt	Washout	2027.09
Wt	Washout	1984.3
Wt	Washout	1664.94
Wt	Washout	1979.82
Wt	Washout	2394.31
Wt	Washout	2296.22
Wt	Washout	2580.21
Wt	Washout	2592.51
Wt	Washout	1850.32
Wt	Washout	2295.16
Wt	Washout	1468.3
Wt	Washout	1620.43
Wt	Washout	1745.94
Wt	Washout	1629.09
Wt	Washout	1863.63
Wt	Washout	1910.61
Wt	Washout	899.41
Wt	Washout	1055.9
Wt	Washout	970.656
Wt	Washout	583.713
Wt	Washout	514.869
Wt	Washout	567.13
Wt	Washout	1326.97
Wt	Washout	1727.53
Wt	Washout	1502.67
Wt	Washout	1585.4
Wt	Washout	1271.62
Wt	Washout	1759.42
Wt	Washout	1882.45
Wt	Washout	2030.54
Wt	Washout	2114.42
Wt	Washout	1729.38
Wt	Washout	1789.52
Wt	Washout	1779.93
Wt	Washout	1650.35
Wt	Washout	1308.32
Wt	Washout	1370.61
Wt	Washout	1663.84
Wt	Washout	1570.88
Wt	Washout	1499.37
Wt	Washout	1044.25
Wt	Washout	937.073
Wt	Washout	762.36

## Sheet: Fig6Sup1B
Total	Ratio
4092.41	0.0868331
3371.59	0.0955304
3422.01	0.0695275
3750.08	0.058164
2967.93	0.0702513
3647.24	0.0375974
3188.04	0.0577092
3591.07	0.0550663
3725.06	0.046113
2911.24	0.0528361
2892.76	0.0562216
2761.42	0.049926
2911.49	0.0663233
3062.29	0.0650057
2491.14	0.0581033
3228.85	0.0613837
3287.83	0.0611863
3059.33	0.0797613
3586.13	0.0648485
3502.45	0.0575631
2655.68	0.058076
3497.7	0.0774095
3172.28	0.08
3530.97	0.0740195
3031.63	0.0524633
2574.71	0.0603666
2213.11	0.0708528
