# Supplementary material for: Plant Trans-Golgi Network/Early Endosome pH regulation requires Cation Chloride Cotransporter (CCC1)
Source: eLife. 2022 Jan 6;11:e70701. doi: 10.7554/eLife.70701 (PMC8791640; doi:10.7554/eLife.70701)
Supplement: Figure 7—source data 1. [file elife-70701-fig7-data1.xlsx]

## Sheet: Fig7A
Line	Size	Conc
Wt	0.517	0
Wt	0.57	0
Wt	0.644	0
Wt	0.58	0
Wt	0.549	0
Wt	0.653	0
Wt	0.513	0
Wt	0.609	0
Wt	0.483	0
Wt	0.612	0
Wt	0.417	0
Wt	0.501	0
Wt	0.518	0
Wt	0.472	0
Wt	0.584	0
Wt	0.53	0
Wt	0.493	0
Wt	0.585	0
Wt	0.507	0
Wt	0.541	0
Wt	0.498	0
Wt	0.405	0
Wt	0.592	0
Wt	0.537	0
Wt	0.462	0
Wt	0.589	0
Wt	0.5	0
Wt	0.476	0
Wt	0.524	0
Wt	0.583	0
Wt	0.526	0
Wt	0.514	0
Wt	0.518	0
Wt	0.598	0
Wt	0.519	0
Wt	0.502	0
Wt	0.429	0
Wt	0.578	0
Wt	0.426	0
Wt	0.517	0
Wt	0.412	0
Wt	0.566	0
Wt	0.587	0
Wt	0.543	0
Wt	0.555	0
Wt	0.52	0
Wt	0.488	0
Wt	0.447	0
Wt	0.523	0
Wt	0.485	0
Wt	0.743	2.5
Wt	0.482	2.5
Wt	0.553	2.5
Wt	0.618	2.5
Wt	0.996	2.5
Wt	0.696	2.5
Wt	0.618	2.5
Wt	0.734	2.5
Wt	0.657	2.5
Wt	0.604	2.5
Wt	0.61	2.5
Wt	0.621	2.5
Wt	0.809	2.5
Wt	0.865	2.5
Wt	0.65	2.5
Wt	0.874	2.5
Wt	0.892	2.5
Wt	0.631	2.5
Wt	0.71	2.5
Wt	0.517	2.5
Wt	0.623	2.5
Wt	0.491	2.5
Wt	0.624	2.5
Wt	0.564	2.5
Wt	0.731	2.5
Wt	0.961	2.5
Wt	0.443	2.5
Wt	0.61	2.5
Wt	0.632	2.5
Wt	0.71	2.5
Wt	0.602	2.5
Wt	0.818	2.5
Wt	0.611	2.5
Wt	0.79	2.5
Wt	0.576	2.5
Wt	0.611	2.5
Wt	0.566	2.5
Wt	0.877	2.5
Wt	0.801	2.5
Wt	0.863	2.5
Wt	0.608	2.5
Wt	0.748	2.5
Wt	0.54	2.5
Wt	0.456	2.5
Wt	0.671	2.5
Wt	0.839	2.5
Wt	0.786	2.5
Wt	0.585	2.5
Wt	0.646	2.5
Wt	0.483	2.5
Wt	0.686	2.5
ccc	0.585	0
ccc	0.436	0
ccc	0.68	0
ccc	0.518	0
ccc	0.466	0
ccc	0.543	0
ccc	0.505	0
ccc	0.52	0
ccc	0.542	0
ccc	0.491	0
ccc	0.508	0
ccc	0.466	0
ccc	0.556	0
ccc	0.431	0
ccc	0.539	0
ccc	0.479	0
ccc	0.468	0
ccc	0.564	0
ccc	0.509	0
ccc	0.504	0
ccc	0.43	0
ccc	0.407	0
ccc	0.463	0
ccc	0.528	0
ccc	0.411	0
ccc	0.394	0
ccc	0.584	0
ccc	0.524	0
ccc	0.984	2.5
ccc	0.811	2.5
ccc	0.691	2.5
ccc	0.789	2.5
ccc	0.947	2.5
ccc	0.956	2.5
ccc	1.108	2.5
ccc	0.801	2.5
ccc	0.884	2.5
ccc	0.874	2.5
ccc	0.696	2.5
ccc	0.952	2.5
ccc	0.746	2.5
ccc	0.538	2.5
ccc	0.716	2.5
ccc	0.684	2.5
ccc	0.693	2.5
ccc	0.654	2.5
ccc	0.735	2.5
ccc	0.805	2.5
ccc	0.498	2.5
ccc	1.006	2.5
ccc	0.608	2.5
ccc	0.614	2.5
ccc	0.534	2.5
ccc	0.902	2.5
ccc	0.443	2.5
ccc	0.728	2.5

## Sheet: Fig7B
Line	pH
Wt	5.57606
Wt	4.98132
Wt	5.23249
Wt	5.44702
Wt	5.48219
Wt	5.30549
Wt	5.18772
Wt	5.7157
Wt	5.30497
Wt	5.25999
Wt	5.14133
Wt	5.88086
Wt	5.70163
Wt	5.65835
Wt	5.43831
Wt	5.81482
Wt	5.37615
Wt	5.87538
Wt	5.60258
Wt	5.69474
Wt	5.31363
Wt	5.54874
Wt	5.94265
Wt	5.44707
Wt	5.56174
Wt	5.16753
ccc	5.67435
ccc	6.51132
ccc	6.25436
ccc	6.02583
ccc	5.56718
ccc	5.79176
ccc	5.50526
ccc	5.75423
ccc	5.79118
ccc	5.96403
ccc	5.44569
ccc	5.78925
ccc	5.74575
ccc	5.80305
ccc	5.74362
ccc	5.47781
ccc	5.37247
ccc	5.50751
ccc	5.31825
ccc	5.44135
ccc	5.58982
ccc	5.74443
ccc	5.74936
ccc	5.98591
ccc	5.43159
ccc	6.11934
ccc	6.16159
ccc	6.04612
ccc	6.25827
ccc	6.24742

## Sheet: Fig7CD
Line	Treat	pH
Wt	Untreated	5.79396
Wt	Untreated	5.55176
Wt	Untreated	5.52395
Wt	Untreated	5.70271
Wt	Untreated	5.55379
Wt	Untreated	5.6811
Wt	Untreated	5.49143
Wt	Untreated	5.50617
Wt	Untreated	5.49708
Wt	Untreated	5.56321
Wt	Untreated	5.77113
Wt	Untreated	5.97245
Wt	Untreated	5.87268
Wt	Untreated	5.92061
Wt	Untreated	5.67166
Wt	Untreated	5.89957
Wt	NaCl	5.95882
Wt	NaCl	6.0735
Wt	NaCl	5.67929
Wt	NaCl	5.938
Wt	NaCl	5.82256
Wt	NaCl	5.86741
Wt	NaCl	5.49294
Wt	NaCl	5.51305
Wt	NaCl	5.50722
Wt	NaCl	5.70953
Wt	NaCl	5.52515
Wt	NaCl	6.4837
Wt	NaCl	6.35788
Wt	NaCl	6.53485
Wt	NaCl	6.30744
Wt	NaCl	6.11354
Wt	NaCl	6.61801
Wt	NaCl	6.51228
Wt	NaCl	6.13757
Wt	Mannitol	6.02309
Wt	Mannitol	6.26733
Wt	Mannitol	6.02271
Wt	Mannitol	6.0968
Wt	Mannitol	6.4544
Wt	Mannitol	5.85393
Wt	Mannitol	6.16222
Wt	Mannitol	5.50726
Wt	Mannitol	5.57488
Wt	Mannitol	5.49713
Wt	Mannitol	5.5209
Wt	Mannitol	5.50529
Wt	Mannitol	6.02054
Wt	Mannitol	5.83993
Wt	Mannitol	6.58196
Wt	Mannitol	6.27403
Wt	Mannitol	6.11311
Wt	Mannitol	6.07368
Wt	Mannitol	5.80412
Wt	Mannitol	5.79158
Wt	Mannitol	6.12299
Wt	Mannitol	6.01328
ccc	Untreated	6.01227
ccc	Untreated	5.76993
ccc	Untreated	6.33618
ccc	Untreated	6.0208
ccc	Untreated	5.99819
ccc	Untreated	6.71737
ccc	Untreated	5.27223
ccc	Untreated	5.77176
ccc	Untreated	5.76119
ccc	Untreated	6.39856
ccc	Untreated	6.01896
ccc	Untreated	5.54087
ccc	Untreated	5.81722
ccc	Untreated	6.21859
ccc	Untreated	5.99553
ccc	Untreated	6.13215
ccc	Untreated	6.43004
ccc	Untreated	5.54085
ccc	Untreated	5.68903
ccc	Untreated	5.72858
ccc	NaCl	6.29283
ccc	NaCl	6.29793
ccc	NaCl	5.71266
ccc	NaCl	6.25732
ccc	NaCl	5.9578
ccc	NaCl	5.42638
ccc	NaCl	5.641
ccc	NaCl	5.65893
ccc	NaCl	6.96308
ccc	NaCl	5.03078
ccc	NaCl	5.56691
ccc	NaCl	5.8977
ccc	NaCl	6.98203
ccc	NaCl	6.51746
ccc	NaCl	6.38509
ccc	NaCl	6.37101
ccc	NaCl	6.51318
ccc	NaCl	6.23882
ccc	NaCl	6.31846
ccc	NaCl	6.34243
ccc	NaCl	5.93556
ccc	Mannitol	5.60042
ccc	Mannitol	5.90881
ccc	Mannitol	5.94467
ccc	Mannitol	5.67136
ccc	Mannitol	5.90014
ccc	Mannitol	6.03816
ccc	Mannitol	6.44782
ccc	Mannitol	5.2361
ccc	Mannitol	5.09542
ccc	Mannitol	6.0933
ccc	Mannitol	5.5779
ccc	Mannitol	5.62239
ccc	Mannitol	5.73331
ccc	Mannitol	6.81325
ccc	Mannitol	5.92525
ccc	Mannitol	6.35135
ccc	Mannitol	5.92914
ccc	Mannitol	6.01051
ccc	Mannitol	5.88217
ccc	Mannitol	6.14163
ccc	Mannitol	6.25759

## Sheet: Fig7EF
Line	Treat	pH
Wt	Untreated	7.45082
Wt	Untreated	7.39799
Wt	Untreated	7.31042
Wt	Untreated	7.54675
Wt	Untreated	7.1407
Wt	Untreated	7.30342
Wt	Untreated	7.4857
Wt	Untreated	7.63989
Wt	Untreated	7.4374
Wt	Untreated	7.65364
Wt	Untreated	7.65462
Wt	Untreated	7.51611
Wt	Untreated	7.80024
Wt	Untreated	7.76134
Wt	Untreated	7.82787
Wt	Untreated	7.66085
Wt	Untreated	7.23045
Wt	NaCl	7.61286
Wt	NaCl	7.3401
Wt	NaCl	7.5248
Wt	NaCl	6.99759
Wt	NaCl	7.05707
Wt	NaCl	7.51938
Wt	NaCl	7.37128
Wt	NaCl	7.13846
Wt	NaCl	7.81013
Wt	NaCl	7.60731
Wt	NaCl	7.65359
Wt	NaCl	7.66834
Wt	NaCl	7.82614
Wt	NaCl	6.9533
Wt	NaCl	7.82492
Wt	NaCl	7.43439
Wt	NaCl	7.34494
Wt	Mannitol	7.42262
Wt	Mannitol	7.61578
Wt	Mannitol	7.27959
Wt	Mannitol	7.36764
Wt	Mannitol	7.43579
Wt	Mannitol	7.45869
Wt	Mannitol	7.73513
Wt	Mannitol	7.40295
Wt	Mannitol	7.39626
Wt	Mannitol	7.76011
Wt	Mannitol	7.63798
Wt	Mannitol	7.63576
Wt	Mannitol	7.74983
Wt	Mannitol	7.7937
Wt	Mannitol	7.76764
Wt	Mannitol	7.36645
ccc	Untreated	7.38514
ccc	Untreated	7.53822
ccc	Untreated	7.2774
ccc	Untreated	7.4527
ccc	Untreated	7.659
ccc	Untreated	6.06962
ccc	Untreated	6.03181
ccc	Untreated	6.50887
ccc	Untreated	6.1938
ccc	Untreated	7.96864
ccc	Untreated	8.16161
ccc	Untreated	7.58757
ccc	Untreated	7.36857
ccc	Untreated	7.31685
ccc	Untreated	7.51204
ccc	NaCl	7.4783
ccc	NaCl	7.33151
ccc	NaCl	7.07035
ccc	NaCl	7.68335
ccc	NaCl	7.46811
ccc	NaCl	7.51478
ccc	NaCl	7.55782
ccc	NaCl	7.84309
ccc	NaCl	8.22848
ccc	NaCl	7.71538
ccc	NaCl	7.65614
ccc	NaCl	7.67046
ccc	NaCl	7.49056
ccc	Mannitol	7.5982
ccc	Mannitol	7.52978
ccc	Mannitol	7.58013
ccc	Mannitol	7.34838
ccc	Mannitol	7.42612
ccc	Mannitol	7.40296
ccc	Mannitol	7.44305
ccc	Mannitol	7.86634
ccc	Mannitol	7.67616
ccc	Mannitol	7.55326
ccc	Mannitol	7.61777
ccc	Mannitol	7.38039

## Sheet: Fig7Sup1B
Line	pH
Wt	6.30194
Wt	6.36211
Wt	6.46778
Wt	6.39443
Wt	6.36057
Wt	6.28504
Wt	6.45871
Wt	6.31317
Wt	6.11335
Wt	6.35865
Wt	6.56298
Wt	6.45071
Wt	5.90515
Wt	6.02629
ccc	6.72232
ccc	6.49029
ccc	6.51913
ccc	6.31038
ccc	6.44947
ccc	6.24266
ccc	6.3334
ccc	6.29636
ccc	6.37941
ccc	6.24325
ccc	6.32305
